# Supplementary material for: Improved modeling of anharmonicity for furan microsolvation
Source: Royal Society of Chemistry journal article supplement (doi:10.1039/d2cp03907a), 2023-01-01
Supplement: d2cp03907a2.pdf [file d2cp03907a2.pdf]

# Supporting Information for Improved modeling of anharmonicity for furan microsolvation

Wassja A. Kopp<sup>†</sup>, Matthias Mödden<sup>†</sup>, Narasimhan Viswanathan<sup>†</sup>, Gabriel Rath<sup>†</sup>, and Kai Leonhard<sup>†,\*</sup>

<sup>†</sup>Chair of Technical Thermodynamics, RWTH Aachen University, 52062 Aachen, Germany  
<sup>\*</sup>to whom correspondence should be addressed, email: kai.leonhard@itt.rwth-aachen.de

March 22, 2023

## Abstract

This is Supplementary material for “The TamkinTools article” in PCCP. It contains all structures, energies, and hindered rotor treatments employed. Furthermore, the code<sup>1</sup> that was used is given in TAMkinTools.zip. All input and output files for the TAMkin / TAMkinTools calculations are given in SI.zip. Therein, the folder final\_data\_original contains the scans as used by TAMkin; the folder final\_data\_improved contains the scans as improved with TAMkinTools. In each of these folders, there are folders for furan (Fu), 2-methylfuran (2mFu), and 2,5-methylfuran (25dmFu). Therein again, two folders OH and PI distinguish the two possible bonding sites.

## Contents

|                                                                                            |            |
|--------------------------------------------------------------------------------------------|------------|
| <b>S1 Geometries employed in this study</b>                                                | <b>S2</b>  |
| S1.1 Methanol – furan system . . . . .                                                     | S3         |
| S1.1.1 Furan OH top Ot . . . . .                                                           | S3         |
| S1.1.2 Furan OH planar Op . . . . .                                                        | S4         |
| S1.1.3 Furan OH-bonded OhiTS . . . . .                                                     | S5         |
| S1.1.4 Furan OH-bonded OloTS . . . . .                                                     | S6         |
| S1.1.5 Furan transition state between OH and pi-bonded conformation TS . . . . .           | S7         |
| S1.1.6 Furan $\pi$ -bonded conformation PI . . . . .                                       | S8         |
| S1.1.7 Furan $\pi$ -bonded low TS PiloTS . . . . .                                         | S9         |
| S1.1.8 Furan $\pi$ -bonded high TS PihITS . . . . .                                        | S10        |
| S1.2 Methanol – 2-methylfuran system . . . . .                                             | S11        |
| S1.2.1 2-methylfuran OH top Ot . . . . .                                                   | S11        |
| S1.2.2 2-methylfuran OH transition state OloTS . . . . .                                   | S12        |
| S1.2.3 2-methylfuran OH planar Op . . . . .                                                | S13        |
| S1.2.4 2-methylfuran OH transition state OmedTS . . . . .                                  | S14        |
| S1.2.5 2-methylfuran OH transition state OhiTS . . . . .                                   | S15        |
| S1.2.6 2-methylfuran transition state between OH- and $\pi$ -bonded conformation . . . . . | S16        |
| S1.2.7 2-methylfuran $\pi$ -bonded conformation of lowest energy PI . . . . .              | S17        |
| S1.2.8 2-methylfuran $\pi$ -bonded low TS PiloTS . . . . .                                 | S18        |
| S1.2.9 2-methylfuran $\pi$ -bonded conformation of high energy PIb . . . . .               | S19        |
| S1.2.10 2-methylfuran $\pi$ -bonded high TS PihITS . . . . .                               | S20        |
| S1.3 Methanol – 2,5-dimethylfuran system . . . . .                                         | S21        |
| S1.3.1 2,5-dimethylfuran OH top Ot . . . . .                                               | S21        |
| S1.3.2 2,5-dimethylfuran OH planar Op . . . . .                                            | S22        |
| S1.3.3 2,5-dimethylfuran OH high-energy TS OhiTS . . . . .                                 | S23        |
| S1.3.4 2,5-dimethylfuran OH low-energy TS OloTS . . . . .                                  | S24        |
| S1.3.5 2,5-dimethylfuran TS for OH- $\pi$ conversion . . . . .                             | S25        |
| S1.3.6 2,5-dimethylfuran $\pi$ -bonded conformation PI . . . . .                           | S26        |
| S1.3.7 2,5-dimethylfuran $\pi$ -bonded low TS PiloTS . . . . .                             | S27        |
| S1.3.8 2,5-dimethylfuran $\pi$ -bonded high TS PihITS . . . . .                            | S28        |
| <b>S2 Method details</b>                                                                   | <b>S29</b> |
| <b>S3 Electronic energies</b>                                                              | <b>S29</b> |
| S3.1 Method details . . . . .                                                              | S29        |
| S3.2 Methanol – furan system . . . . .                                                     | S29        |
| S3.3 Methanol – 2-methylfuran system . . . . .                                             | S31        |
| S3.4 Methanol – 2,5-dimethylfuran system . . . . .                                         | S31        |

<sup>1</sup>also available at [https://git.rwth-aachen.de/Wassja.Kopp/tamkintools/-/releases/1\\_0PCCP](https://git.rwth-aachen.de/Wassja.Kopp/tamkintools/-/releases/1_0PCCP)

|                                                                        |            |
|------------------------------------------------------------------------|------------|
| <b>S4 Hindered rotor results</b>                                       | <b>S31</b> |
| S4.1 Technical hints for working with TAMkin and TAMkinTools . . . . . | S34        |
| S4.2 Original scans used for the Goebench challenge . . . . .          | S34        |
| S4.2.1 Methanol - furan dimer . . . . .                                | S34        |
| S4.2.2 Methanol - 2-methylfuran dimer . . . . .                        | S35        |
| S4.2.3 Methanol - 2,5-dimethylfuran dimer . . . . .                    | S36        |
| S4.3 Improved Scans . . . . .                                          | S37        |
| S4.3.1 Methanol - furan dimer . . . . .                                | S37        |
| S4.3.2 Methanol - 2-methylfuran dimer . . . . .                        | S39        |
| S4.3.3 Methanol - 2,5-dimethylfuran dimer . . . . .                    | S40        |
| S4.4 Zero-Point Energies . . . . .                                     | S41        |
| <b>S5 Selected probability density functions</b>                       | <b>S42</b> |
| S5.1 Original Goebench submission profiles . . . . .                   | S42        |
| S5.1.1 Methanol - furan, OH-bonded . . . . .                           | S42        |
| S5.1.2 Methanol - 2-methylfuran . . . . .                              | S43        |
| S5.1.3 Methanol - 2,5-dimethylfuran, OH-bonded . . . . .               | S45        |
| S5.2 Improved profiles using TAMkinTools . . . . .                     | S46        |
| S5.2.1 Methanol - furan, OH-bonded, aug-cc-pv5z . . . . .              | S46        |
| S5.2.2 Methanol - furan, OH-bonded, aug-cc-pv(t,q)z . . . . .          | S47        |
| S5.2.3 Methanol - 2-methylfuran . . . . .                              | S48        |
| S5.2.4 Methanol - 2,5-dimethylfuran, OH-bonded . . . . .               | S50        |

## S1 Geometries employed in this study

## S1.1 Methanol – furan system

### S1.1.1 Furan OH top Ot

up to table of contents

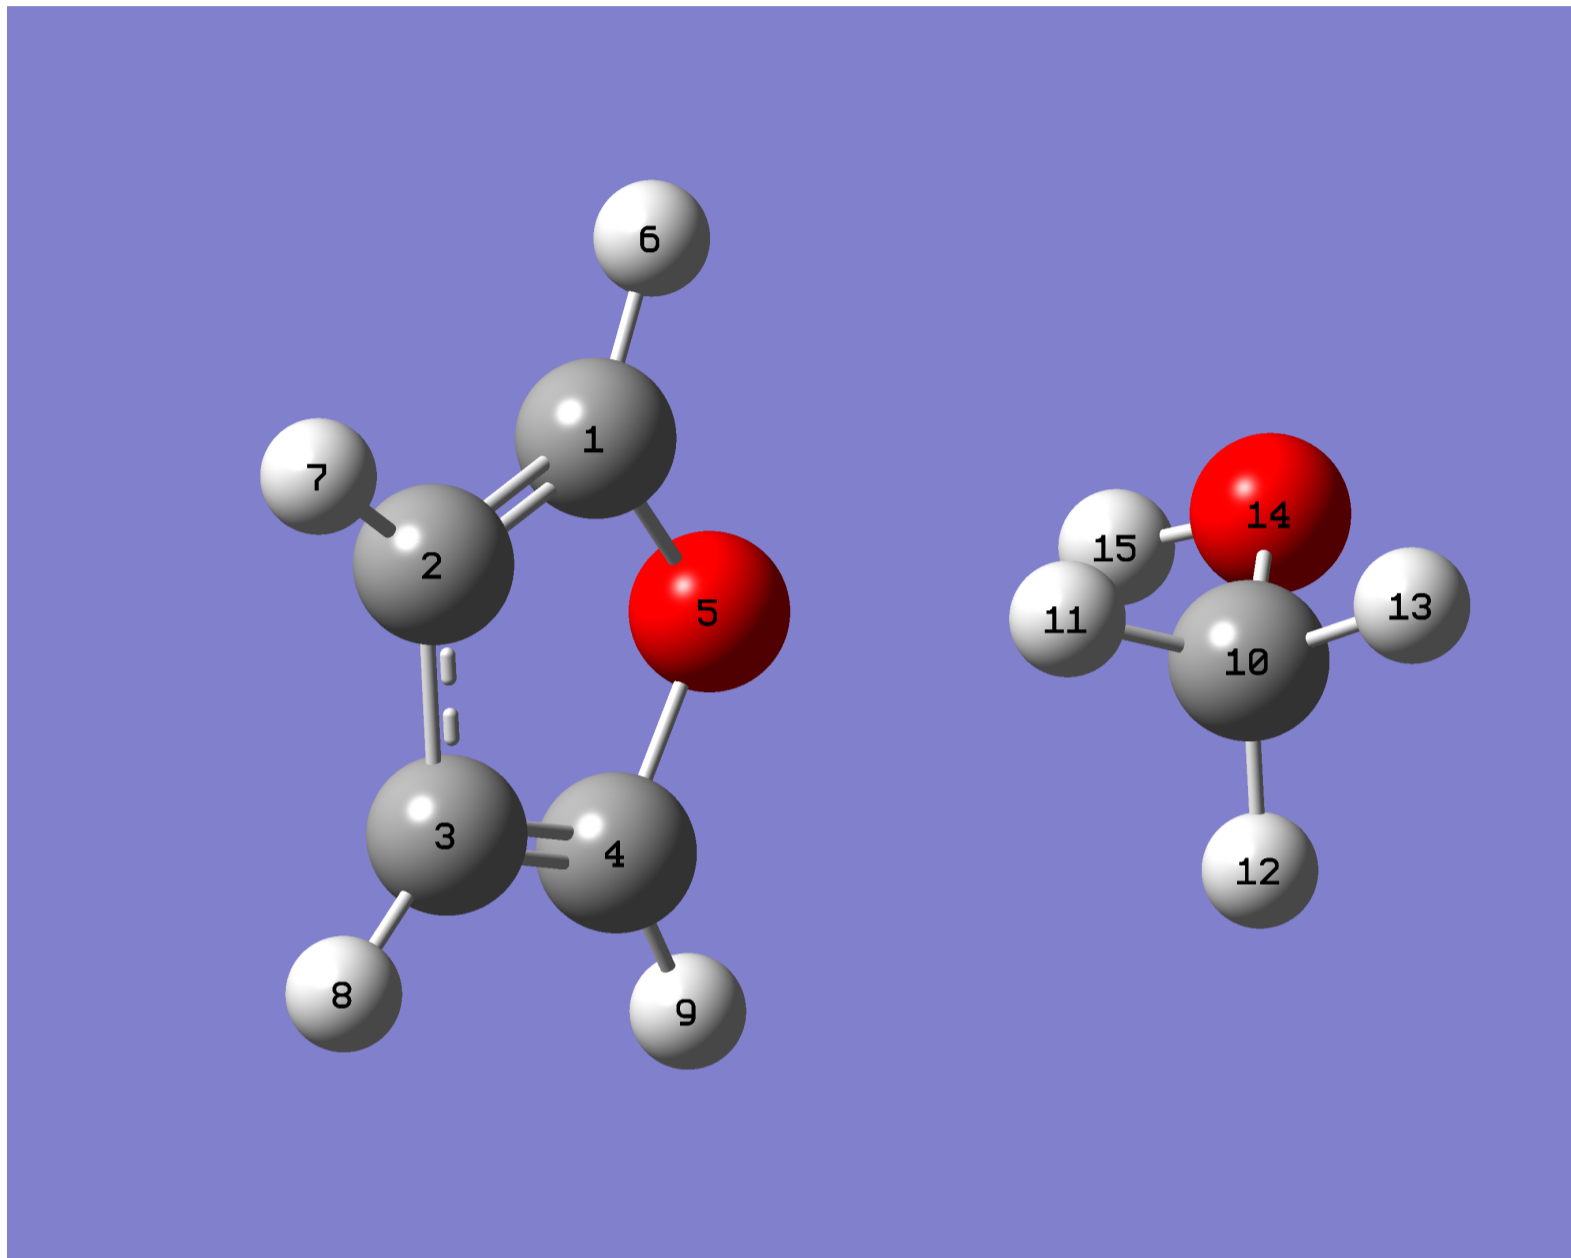

Figure S1: OH-bonded methanol – furan structure in top conformation Ot.

Table S1: Methanol – furan Ot

| #  | N | ref atom |    |   | Bond      | Angle       | Dihedral     | X          | Y          | Z          |
|----|---|----------|----|---|-----------|-------------|--------------|------------|------------|------------|
|    |   | A        | B  | C |           |             |              |            |            |            |
| 1  | C |          |    |   |           |             | -0.8635090   | 1.1517500  | -0.1031540 |            |
| 2  | C | 1        |    |   | 1.3596776 |             | -1.7742830   | 0.6171140  | 0.7532210  |            |
| 3  | C | 2        | 1  |   | 1.4363885 | 106.3125829 | -1.8884780   | -0.7717980 | 0.4052340  |            |
| 4  | C | 3        | 2  | 1 | 1.3597057 | 106.2695006 | 0.0573672    | -1.0371800 | -0.9750300 | -0.6353370 |
| 5  | O | 4        | 3  | 2 | 1.3682976 | 110.2553260 | -0.0387796   | -0.4003660 | 0.1913940  | -0.9611610 |
| 6  | H | 1        | 2  | 3 | 1.0760892 | 134.0561603 | -179.3651624 | -0.4435310 | 2.1341910  | -0.2312010 |
| 7  | H | 2        | 1  | 5 | 1.0777065 | 126.2291097 | -179.8855113 | -2.3012420 | 1.1430600  | 1.5324170  |
| 8  | H | 3        | 2  | 1 | 1.0777017 | 127.4726825 | -179.8054212 | -2.5197890 | -1.5135200 | 0.8664670  |
| 9  | H | 4        | 3  | 2 | 1.0761335 | 133.9381110 | -179.6751127 | -0.7786600 | -1.8324090 | -1.2321050 |
| 10 | C | 5        | 4  | 3 | 3.2983852 | 95.5746401  | 96.0746128   | 2.3147590  | -0.4206530 | 0.8088220  |
| 11 | H | 10       | 5  | 4 | 1.0956086 | 62.1003251  | -77.4750056  | 1.4189490  | -0.0858340 | 1.3434050  |
| 12 | H | 10       | 5  | 4 | 1.0959491 | 91.5422564  | 32.9613275   | 2.2305550  | -1.4970550 | 0.6207450  |
| 13 | H | 10       | 5  | 4 | 1.0895244 | 159.9942721 | -143.9404426 | 3.1830950  | -0.2488100 | 1.4440590  |
| 14 | O | 10       | 5  | 4 | 1.4213518 | 64.6892012  | 146.6427033  | 2.5235430  | 0.3143430  | -0.3896900 |
| 15 | H | 14       | 10 | 5 | 0.9617644 | 107.2251881 | -13.2707409  | 1.7173490  | 0.2461880  | -0.9096870 |

### S1.1.2 Furan OH planar Op

up to table of contents

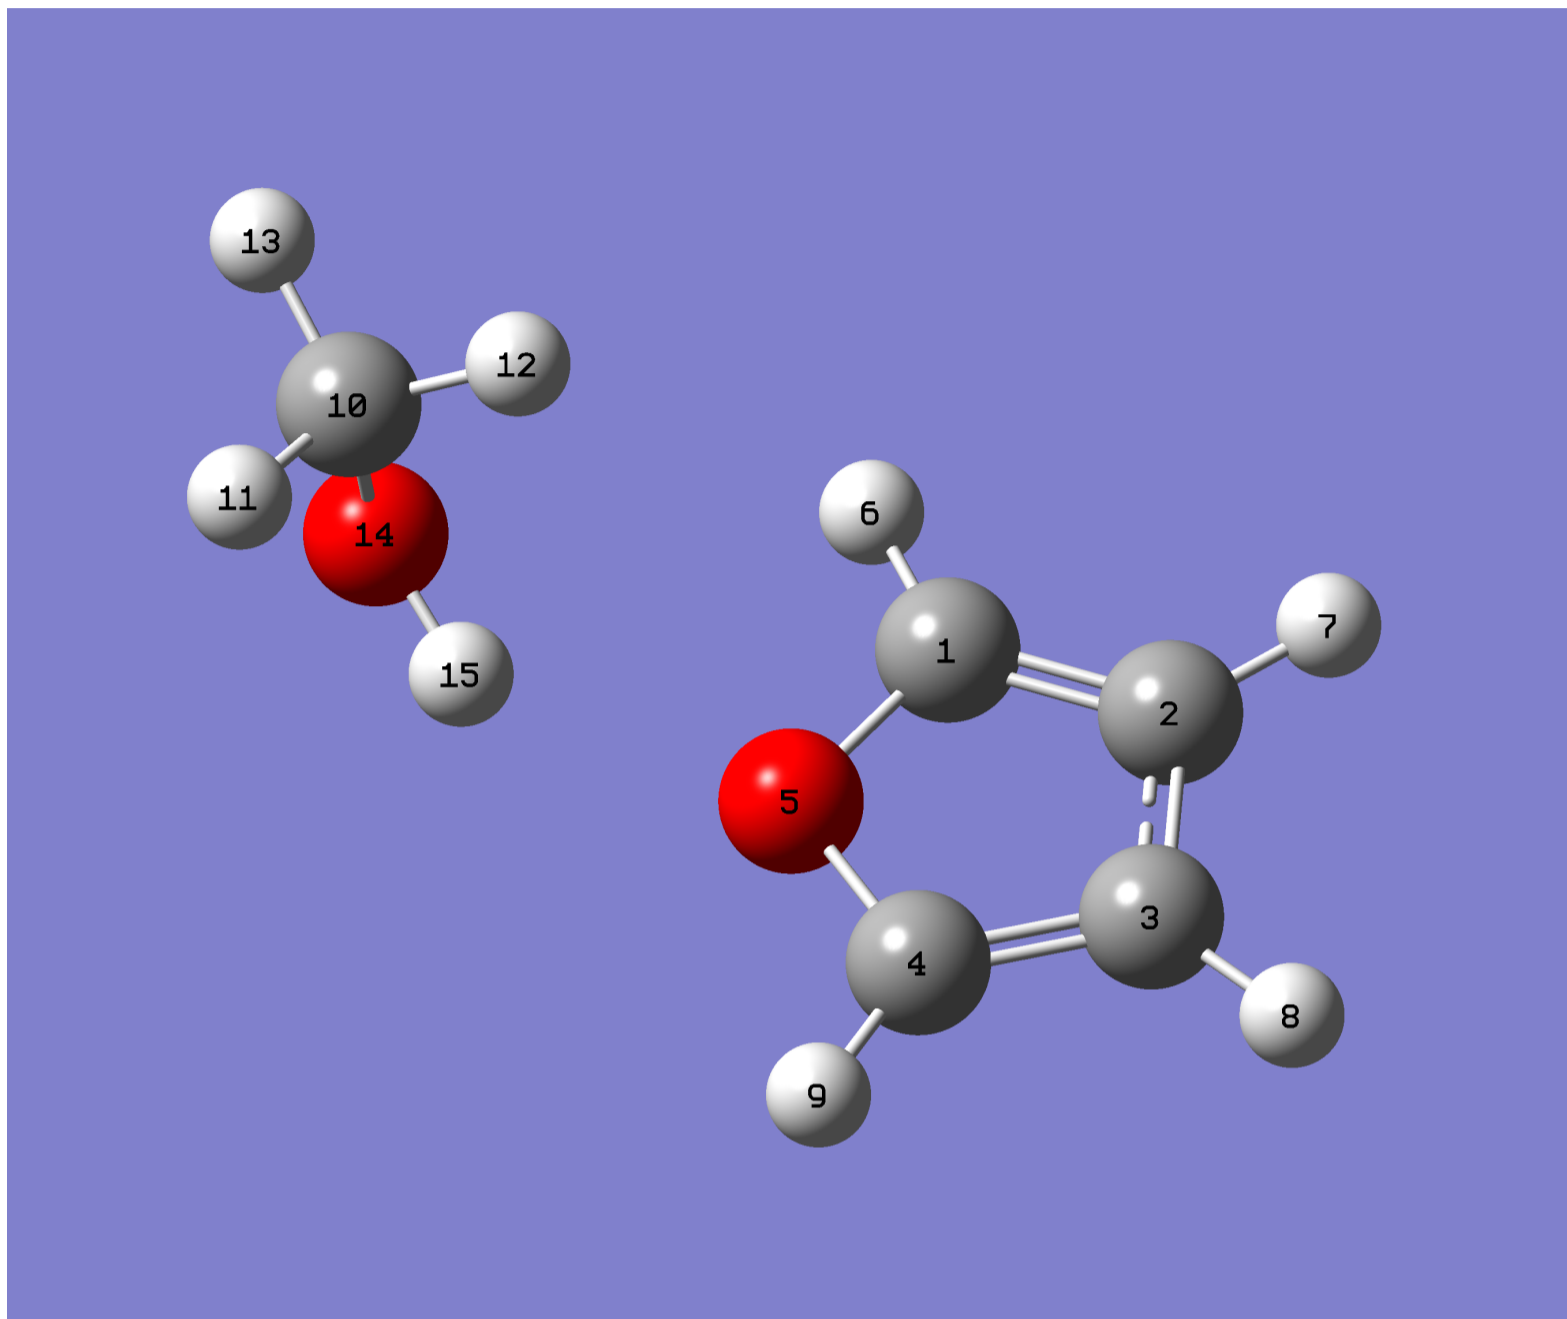

Figure S2: OH-bonded methanol – furan structure in plane conformation Op.

Table S2: Methanol – furan Op

| #  | N | ref atom |    |   | Bond      | Angle       | Dihedral     | X          | Y          | Z          |
|----|---|----------|----|---|-----------|-------------|--------------|------------|------------|------------|
|    |   | A        | B  | C |           |             |              |            |            |            |
| 1  | C |          |    |   |           |             | 0.6586580    | 0.9109110  | -0.1866770 |            |
| 2  | C | 1        |    |   | 1.3595904 |             | 1.9692160    | 1.0180380  | 0.1589350  |            |
| 3  | C | 2        | 1  |   | 1.4365992 | 106.3692336 | 2.4744270    | -0.3235900 | 0.2517430  |            |
| 4  | C | 3        | 2  | 1 | 1.3597438 | 106.2800379 | -0.0028897   | 1.4319830  | -1.1448020 | -0.0446090 |
| 5  | O | 4        | 3  | 2 | 1.3674764 | 110.1929740 | -0.0446830   | 0.3123020  | -0.4076320 | -0.3145840 |
| 6  | H | 1        | 2  | 3 | 1.0764165 | 134.5587054 | -179.7625615 | -0.1325150 | 1.6157740  | -0.3761130 |
| 7  | H | 2        | 1  | 5 | 1.0776621 | 126.2042714 | 179.9607813  | 2.5106240  | 1.9347610  | 0.3258240  |
| 8  | H | 3        | 2  | 1 | 1.0777083 | 127.4750326 | 179.9783184  | 3.4760230  | -0.6310720 | 0.5041620  |
| 9  | H | 4        | 3  | 2 | 1.0760065 | 133.9335471 | 179.9598544  | 1.3171500  | -2.2128790 | -0.1063730 |
| 10 | C | 5        | 4  | 3 | 3.4174466 | 140.7882001 | -124.6747508 | -2.9377940 | -0.0661630 | 0.6850240  |
| 11 | H | 10       | 5  | 4 | 1.0956135 | 100.5419703 | -35.3866601  | -3.1896730 | -1.1089450 | 0.9075810  |
| 12 | H | 10       | 5  | 4 | 1.0958078 | 62.7665373  | 70.3406292   | -2.1609300 | 0.2644690  | 1.3835650  |
| 13 | H | 10       | 5  | 4 | 1.0894304 | 150.9042948 | 149.5767514  | -3.8270470 | 0.5438430  | 0.8398800  |
| 14 | O | 10       | 5  | 4 | 1.4211436 | 57.9644445  | -144.8373978 | -2.5431930 | 0.1088320  | -0.6689760 |
| 15 | H | 14       | 10 | 5 | 0.9622023 | 107.4270044 | 23.9557337   | -1.7254390 | -0.3819210 | -0.7965420 |

### S1.1.3 Furan OH-bonded OhiTS

up to table of contents

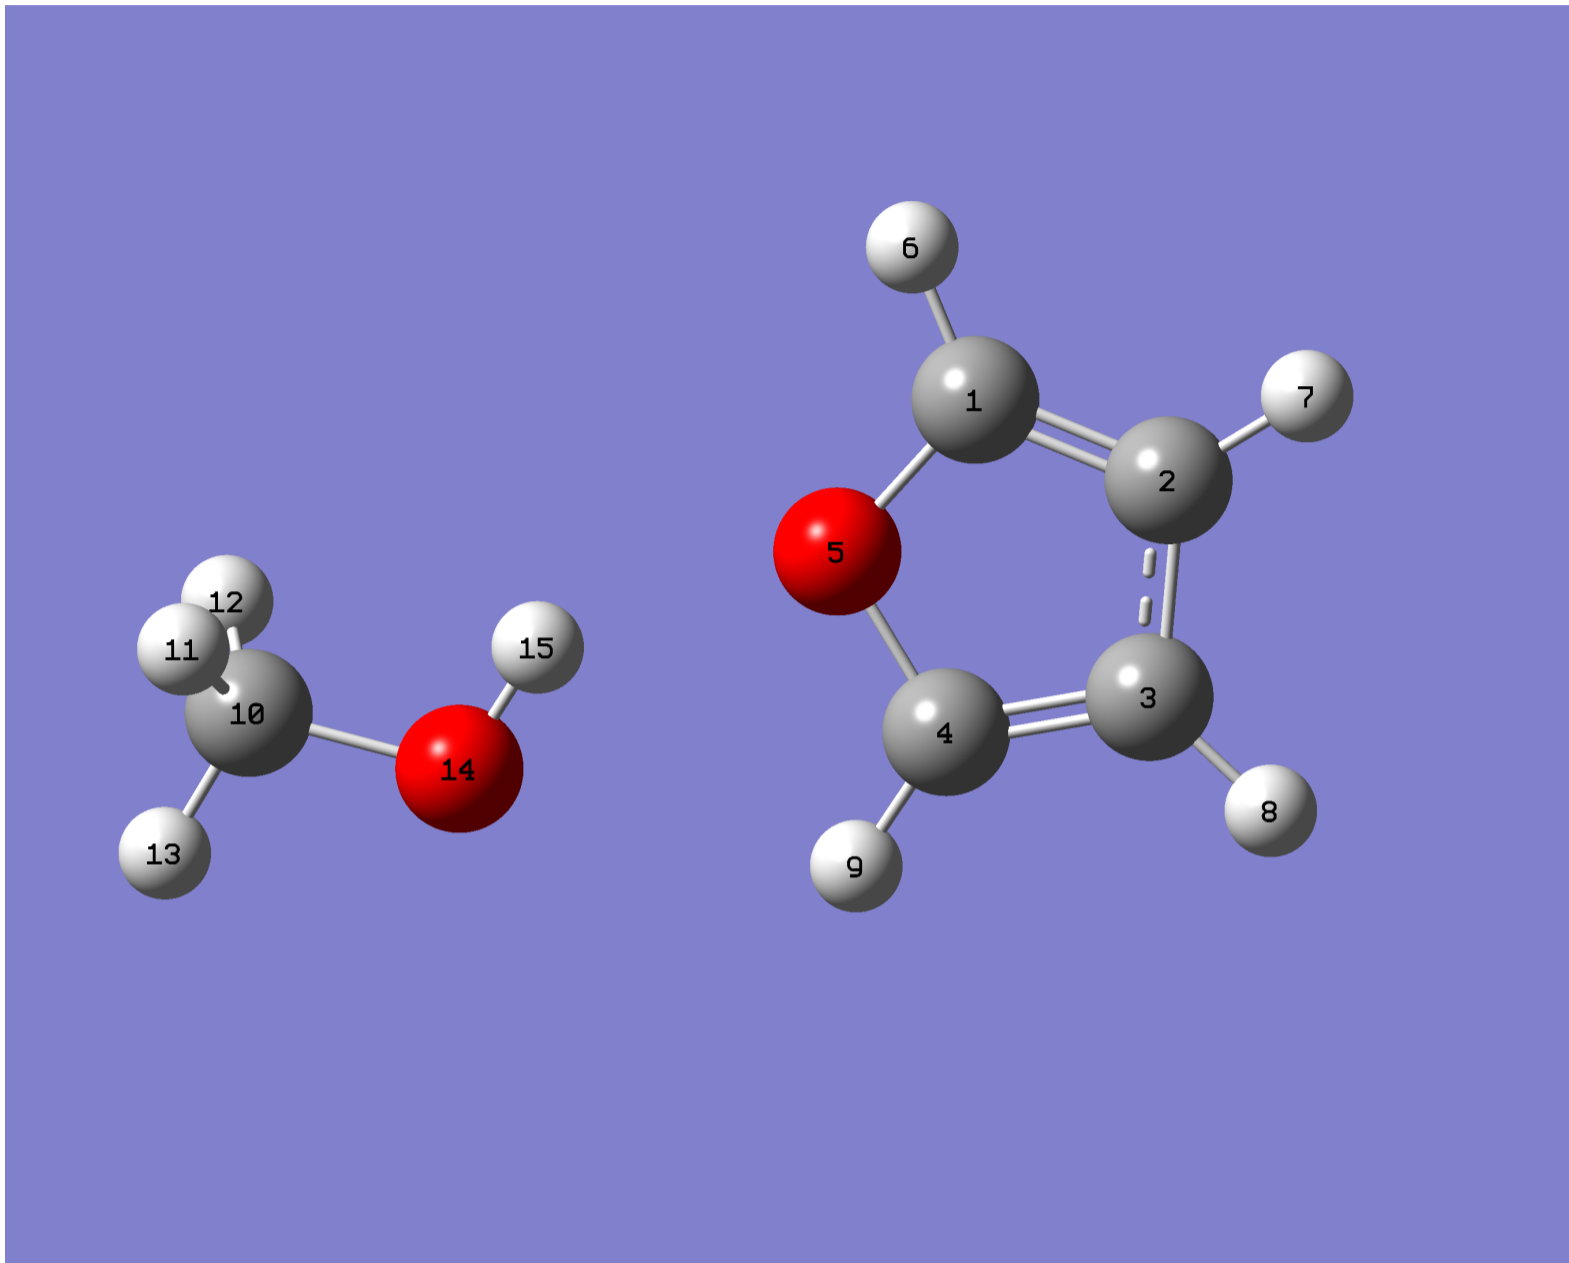

Figure S3: OH-bonded methanol – furan transition state structure of highest energy.

Table S3: OH-bonded methanol – furan transition state of highest energy OhiTS

| #  | N | ref atom |    |   | Bond      | Angle       | Dihedral     | X          | Y          | Z          |
|----|---|----------|----|---|-----------|-------------|--------------|------------|------------|------------|
|    |   | A        | B  | C |           |             |              |            |            |            |
| 1  | C |          |    |   |           |             | 1.5451280    | 1.1693480  | 0.0000080  |            |
| 2  | C | 1        |    |   | 1.3597363 |             | 2.6484850    | 0.3746870  | -0.0000090 |            |
| 3  | C | 2        | 1  |   | 1.4367073 | 106.2625998 | 2.1689110    | -0.9796160 | -0.0000150 |            |
| 4  | C | 3        | 2  | 1 | 1.3595814 | 106.4020587 | 0.0000000    | 0.8113160  | -0.9061490 | -0.0000010 |
| 5  | O | 1        | 2  | 3 | 1.3673152 | 110.1919615 | 0.0000000    | 0.4121840  | 0.4038490  | 0.0000130  |
| 6  | H | 1        | 2  | 3 | 1.0760020 | 133.8948247 | 180.0000000  | 1.3929120  | 2.2345290  | 0.0000180  |
| 7  | H | 2        | 1  | 5 | 1.0777374 | 126.2418613 | 180.0000000  | 3.6734980  | 0.7076530  | -0.0000170 |
| 8  | H | 3        | 2  | 1 | 1.0776441 | 127.4200779 | -180.0000000 | 2.7571040  | -1.8825810 | -0.0000270 |
| 9  | H | 4        | 3  | 2 | 1.0764615 | 134.6885141 | 180.0000000  | 0.0140440  | -1.6294240 | 0.0000010  |
| 10 | C | 5        | 1  | 2 | 4.0344156 | 148.3486649 | -179.9986492 | -3.6187090 | 0.2352940  | 0.0000010  |
| 11 | H | 10       | 5  | 1 | 1.0956672 | 95.6774585  | -54.8559075  | -3.7532310 | 0.8578380  | 0.8915330  |
| 12 | H | 10       | 5  | 1 | 1.0956664 | 95.6775069  | 54.8538294   | -3.7532270 | 0.8578490  | -0.8915230 |
| 13 | H | 10       | 5  | 1 | 1.0893360 | 137.3065525 | 179.9990436  | -4.3878030 | -0.5361640 | -0.0000050 |
| 14 | O | 10       | 5  | 1 | 1.4201336 | 30.2877700  | 179.9989525  | -2.3635660 | -0.4290820 | 0.0000000  |
| 15 | H | 14       | 10 | 5 | 0.9623740 | 108.8198514 | 0.0000000    | -1.6630250 | 0.2307710  | 0.0000060  |

### S1.1.4 Furan OH-bonded OloTS

up to table of contents

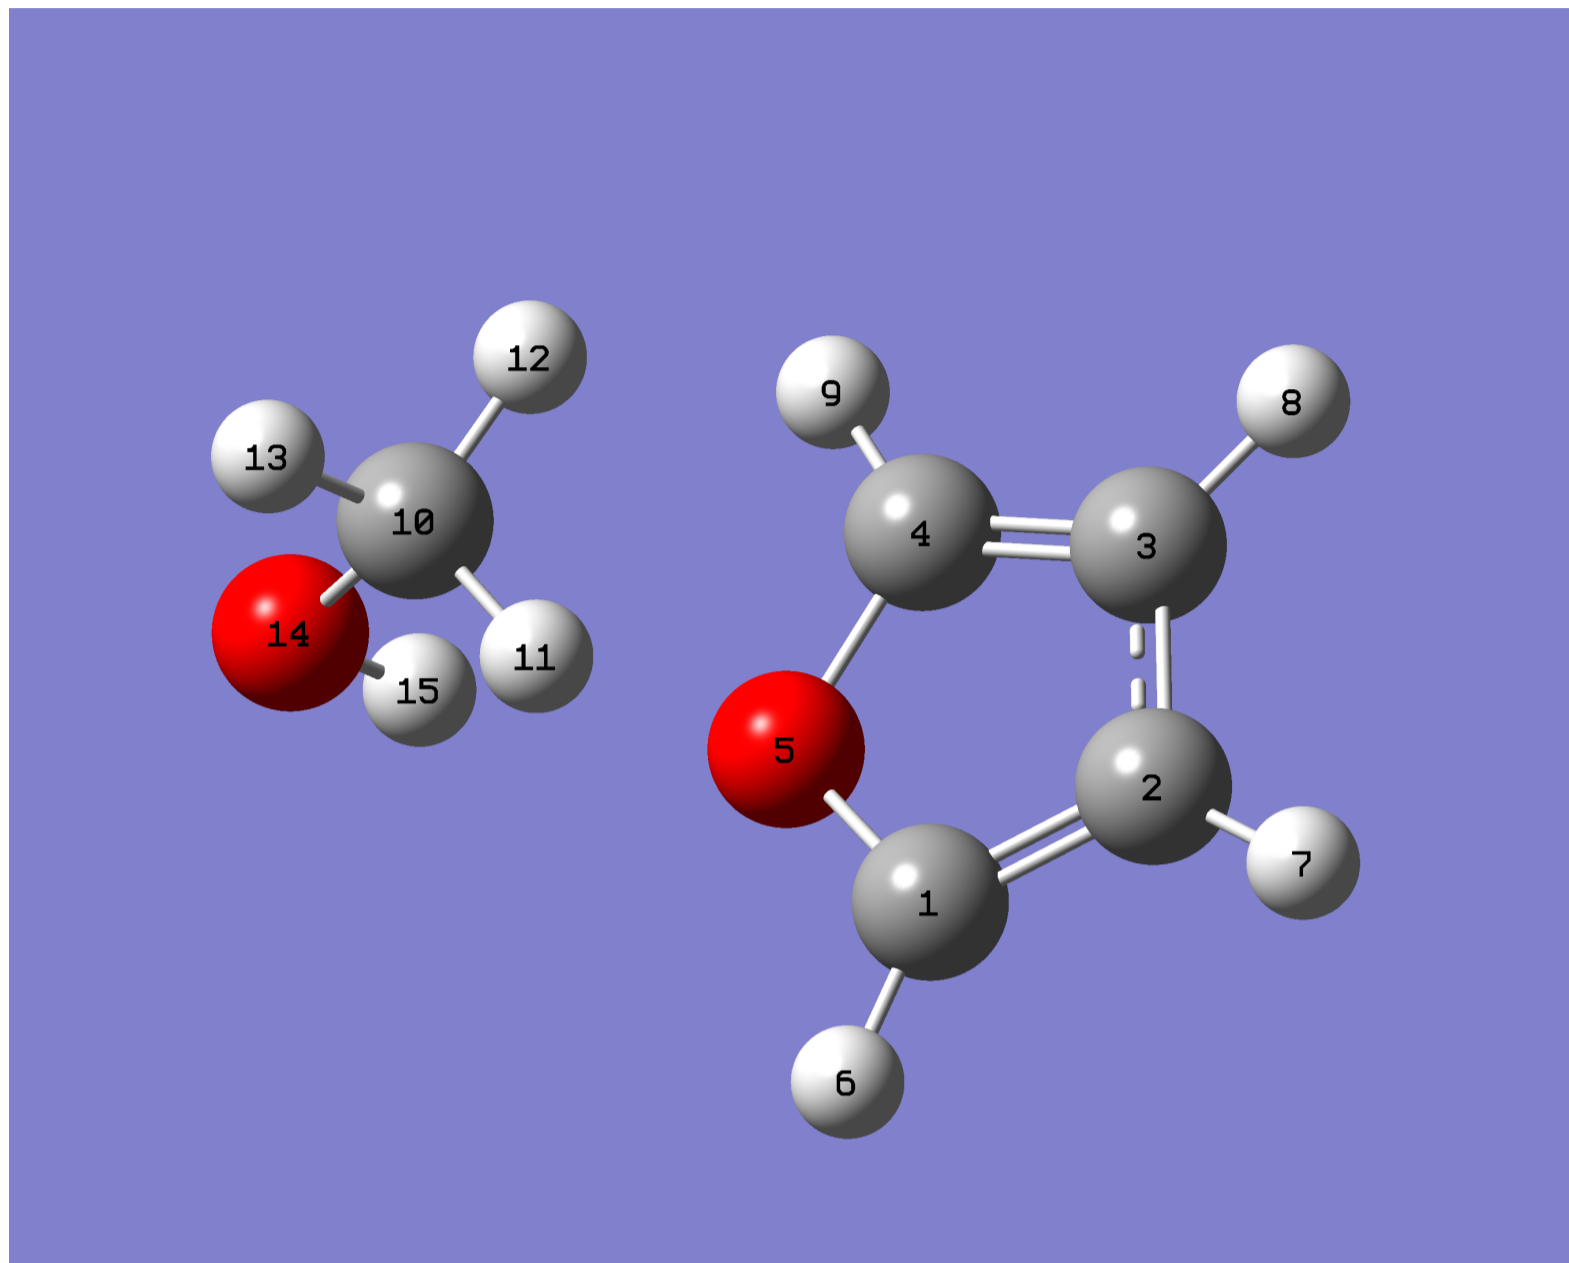

Figure S4: OH-bonded methanol – furan transition state structure of lowest energy.

Table S4: OH-bonded methanol – furan transition state of lowest energy OloTS

| #  | N | ref atom |    |   | Bond      | Angle       | Dihedral     | X          | Y          | Z          |
|----|---|----------|----|---|-----------|-------------|--------------|------------|------------|------------|
|    |   | A        | B  | C |           |             |              |            |            |            |
| 1  | C |          |    |   |           |             | 0.9637520    | -1.0999170 | -0.3666400 |            |
| 2  | C | 1        |    |   | 1.3595240 |             | 1.8863770    | -0.7182480 | 0.5560720  |            |
| 3  | C | 2        | 1  |   | 1.4364970 | 106.3041531 | 1.8863770    | 0.7182490  | 0.5560700  |            |
| 4  | C | 3        | 2  | 1 | 1.3595235 | 106.3041850 | 0.0000000    | 0.9637520  | 1.0999160  | -0.3666420 |
| 5  | O | 4        | 3  | 2 | 1.3687503 | 110.2213379 | 0.0413680    | 0.3870760  | -0.0000010 | -0.9420590 |
| 6  | H | 1        | 2  | 3 | 1.0761581 | 134.0280575 | 179.9592771  | 0.6101510  | -2.0525320 | -0.7210510 |
| 7  | H | 2        | 1  | 5 | 1.0776950 | 126.2477947 | -179.8269790 | 2.4936390  | -1.3735250 | 1.1587920  |
| 8  | H | 3        | 2  | 1 | 1.0776956 | 127.4475906 | -179.7821565 | 2.4936400  | 1.3735270  | 1.1587890  |
| 9  | H | 4        | 3  | 2 | 1.0761587 | 134.0280432 | -179.9591852 | 0.6101520  | 2.0525310  | -0.7210560 |
| 10 | C | 5        | 4  | 3 | 3.3272674 | 96.6957687  | 99.0535287   | -2.3789590 | 0.0000020  | 0.9072000  |
| 11 | H | 10       | 5  | 4 | 1.0958838 | 76.5140474  | -110.6384616 | -1.8407110 | -0.8899680 | 1.2524590  |
| 12 | H | 10       | 5  | 4 | 1.0958838 | 76.5141933  | 2.6205137    | -1.8407150 | 0.8899760  | 1.2524550  |
| 13 | H | 10       | 5  | 4 | 1.0895126 | 170.6322886 | 125.9914717  | -3.3711810 | 0.0000010  | 1.3572370  |
| 14 | O | 10       | 5  | 4 | 1.4206486 | 63.6158715  | 125.9909449  | -2.5614640 | -0.0000010 | -0.5016770 |
| 15 | H | 14       | 10 | 5 | 0.9620137 | 107.3467226 | 0.0000000    | -1.6876610 | -0.0000010 | -0.9040930 |

### S1.1.5 Furan transition state between OH and pi-bonded conformation TS

up to table of contents

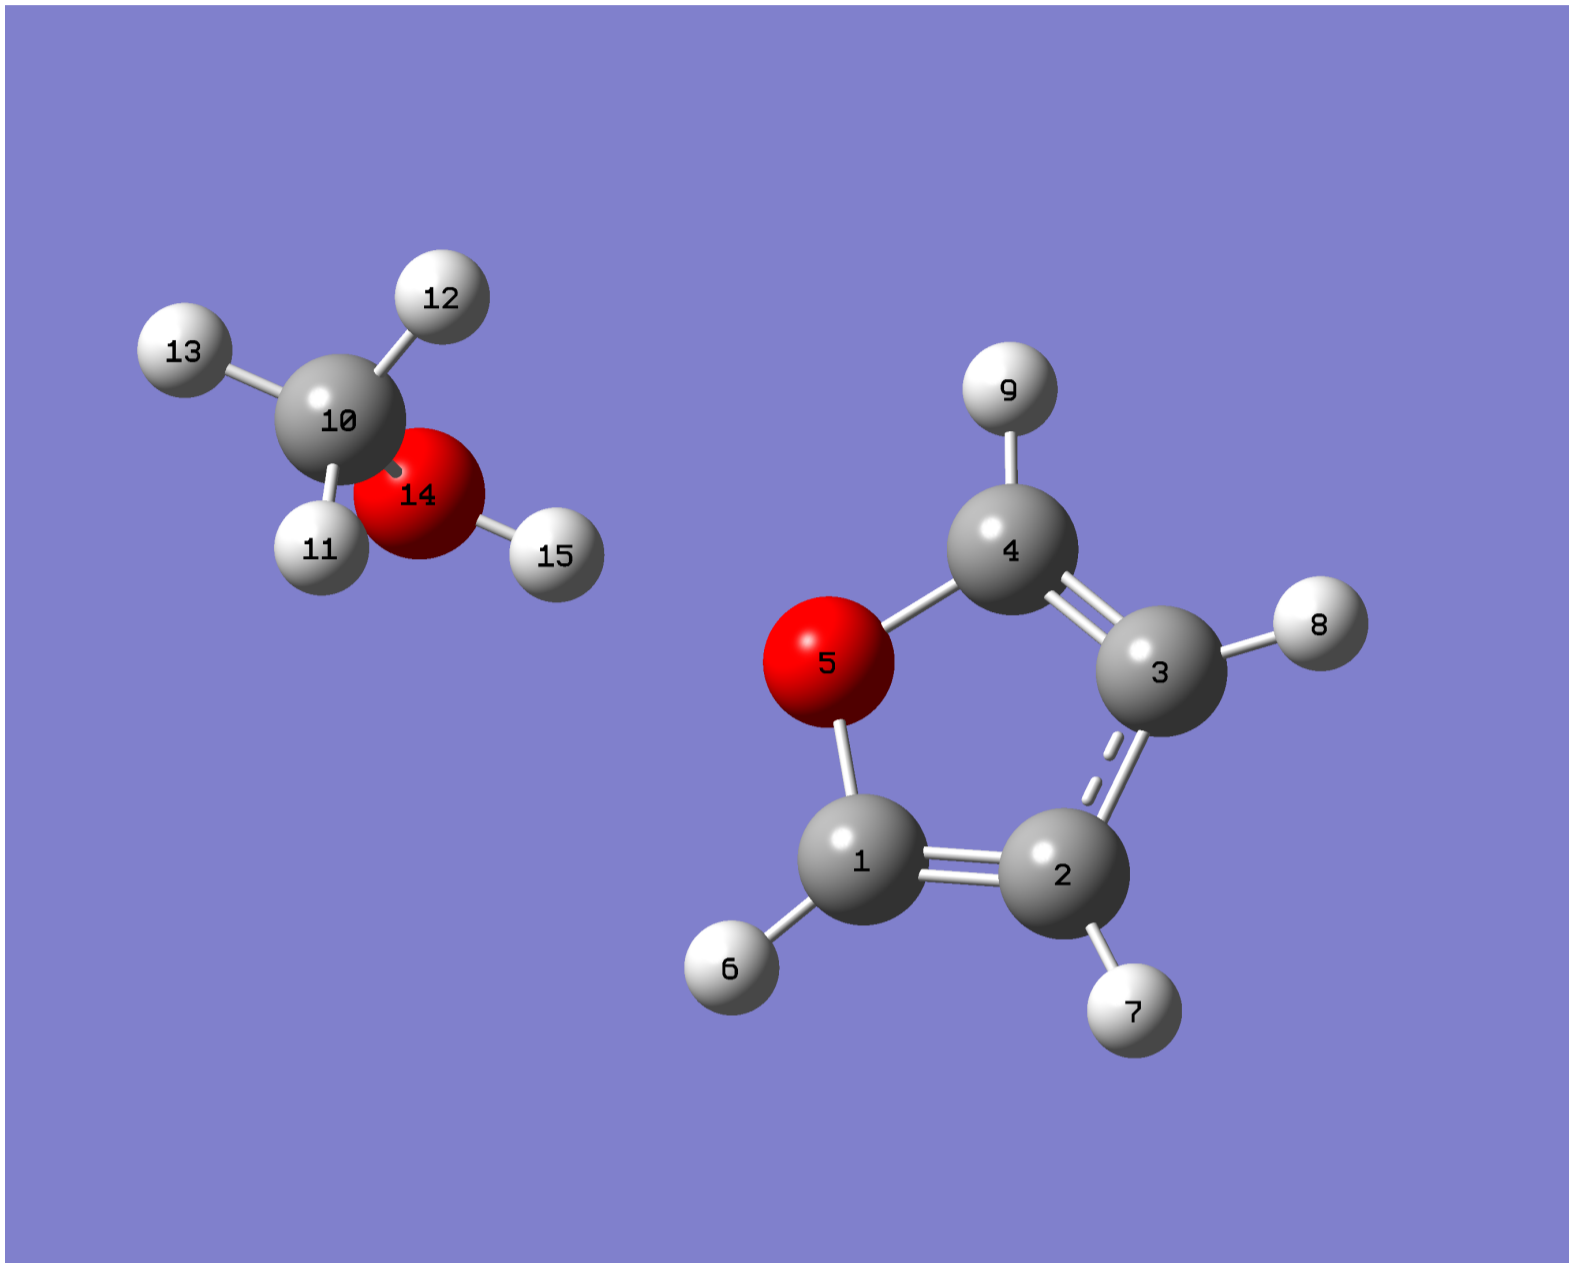

Figure S5: Methanol – furan transition state between OH- and pi-bonded conformation.

Table S5: Methanol – furan transition state between OH- and pi-bonded conformation.

| #  | N | ref atom |    |   | Bond      | Angle       | Dihedral     | X          | Y          | Z          |
|----|---|----------|----|---|-----------|-------------|--------------|------------|------------|------------|
|    |   | A        | B  | C |           |             |              |            |            |            |
| 1  | C |          |    |   |           |             | 0.3546530    | -1.0128590 | -1.1004770 |            |
| 2  | C | 1        |    |   | 1.3593363 |             | 0.3546530    | -2.3173720 | -0.7183240 |            |
| 3  | C | 2        | 1  |   | 1.4366480 | 106.3277810 | 0.3546530    | -2.3173720 | 0.7183240  |            |
| 4  | C | 3        | 2  | 1 | 1.3593363 | 106.3277810 | 0.0000000    | 0.3546530  | -1.0128590 | 1.1004770  |
| 5  | O | 1        | 2  | 3 | 1.3683667 | 110.1365661 | -0.0345186   | 0.3538790  | -0.1996080 | 0.0000000  |
| 6  | H | 1        | 2  | 3 | 1.0760830 | 134.0871415 | 179.7835461  | 0.3575730  | -0.5116620 | -2.0527100 |
| 7  | H | 2        | 1  | 5 | 1.0776285 | 126.2287648 | -179.9665639 | 0.3556840  | -3.1729590 | -1.3734980 |
| 8  | H | 3        | 2  | 1 | 1.0776285 | 127.4434149 | -179.9309574 | 0.3556840  | -3.1729590 | 1.3734980  |
| 9  | H | 4        | 3  | 2 | 1.0760830 | 134.0871415 | -179.7835461 | 0.3575730  | -0.5116620 | 2.0527100  |
| 10 | C | 5        | 1  | 2 | 3.4501758 | 121.0084030 | -144.3681922 | -1.3693680 | 2.7893940  | 0.0000000  |
| 11 | H | 10       | 5  | 1 | 1.0961556 | 79.7128220  | 14.1480271   | -1.7991700 | 2.3156440  | -0.8901620 |
| 12 | H | 10       | 5  | 1 | 1.0961556 | 79.7128220  | 125.3947235  | -1.7991700 | 2.3156440  | 0.8901620  |
| 13 | H | 10       | 5  | 1 | 1.0896072 | 165.1126605 | -110.2286247 | -1.6528000 | 3.8414920  | 0.0000000  |
| 14 | O | 10       | 5  | 1 | 1.4193660 | 57.9857394  | -110.2286247 | 0.0490900  | 2.7386320  | 0.0000000  |
| 15 | H | 14       | 10 | 5 | 0.9626969 | 107.4906692 | 0.0000000    | 0.3054060  | 1.8106840  | 0.0000000  |

### S1.1.6 Furan $\pi$ -bonded conformation PI

up to table of contents

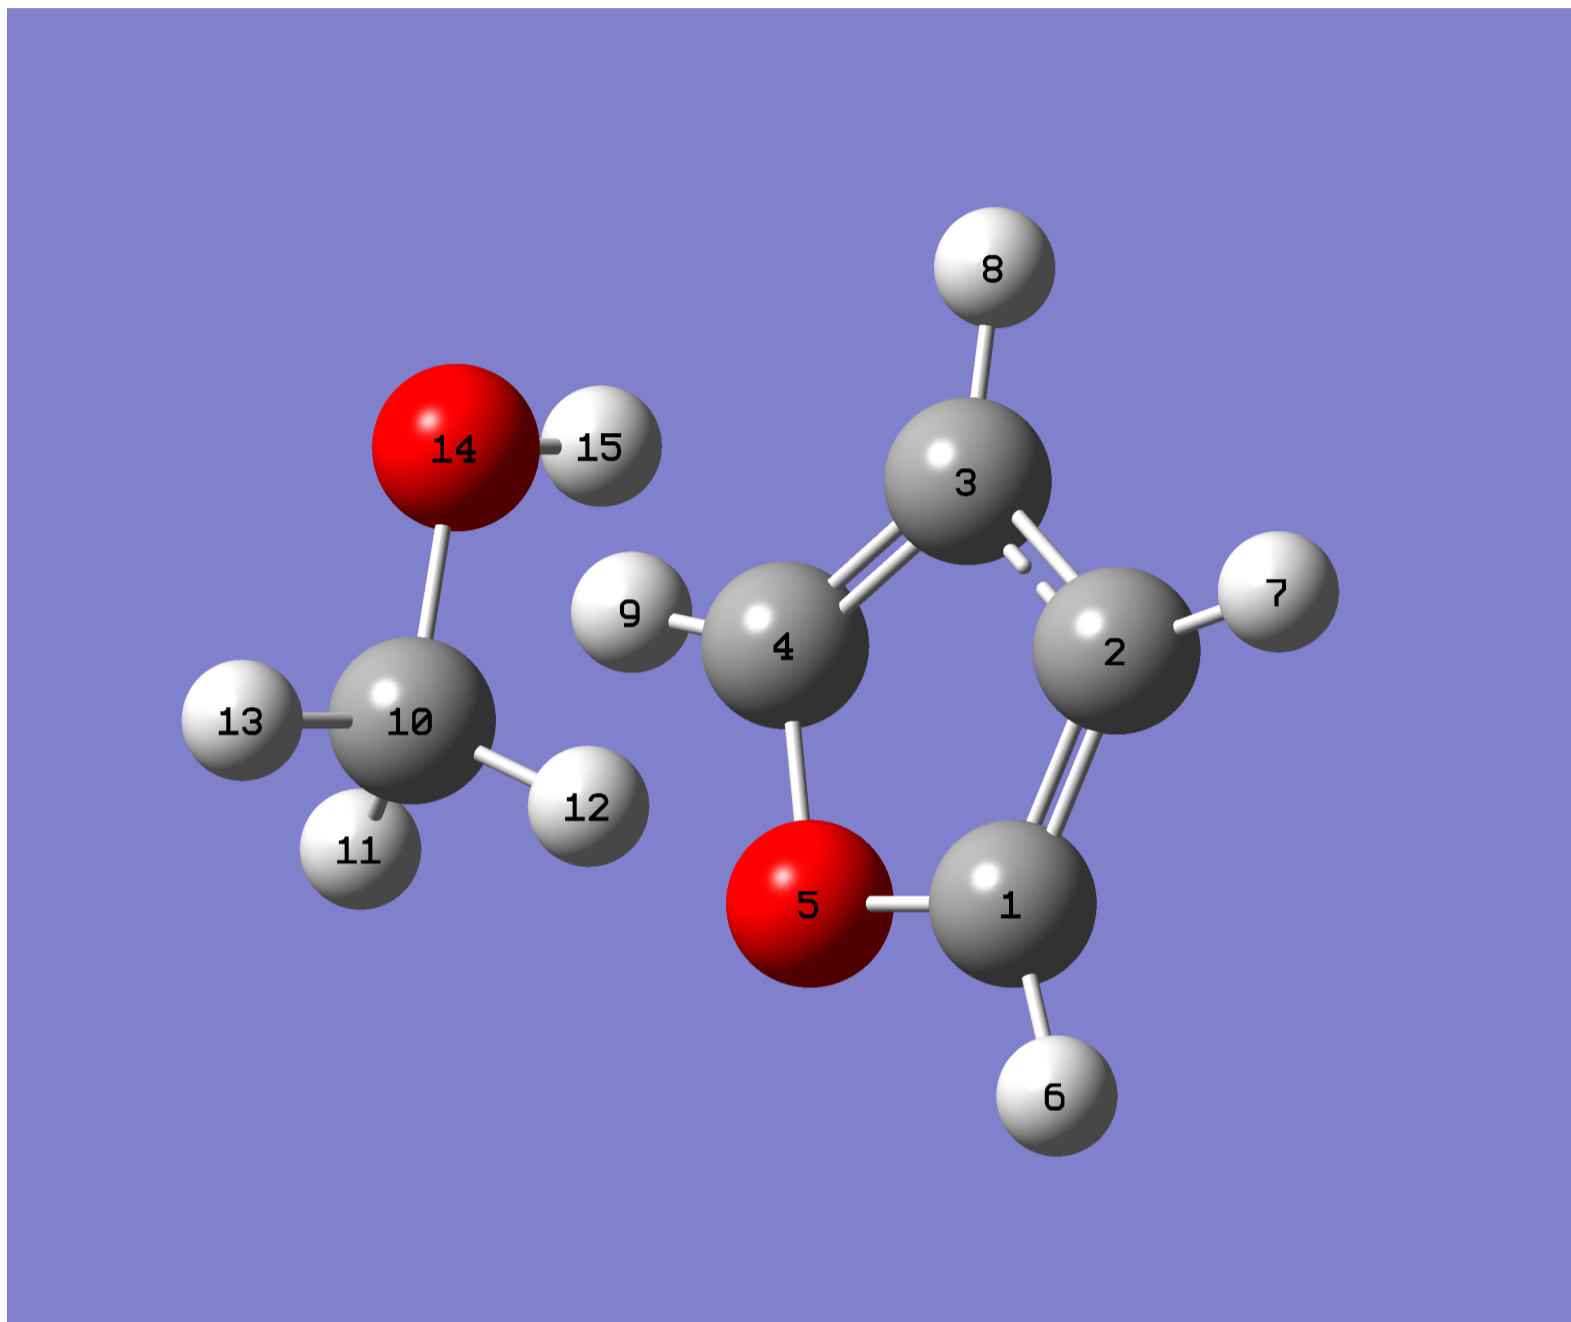

Figure S6:  $\pi$ -bonded methanol – furan structure.

Table S6:  $\pi$ -bonded methanol – furan structure.

| #  | N | ref atom |    |   | Bond      | Angle       | Dihedral     | X          | Y          | Z          |
|----|---|----------|----|---|-----------|-------------|--------------|------------|------------|------------|
|    |   | A        | B  | C |           |             |              |            |            |            |
| 1  | C |          |    |   |           |             | 1.1681400    | -1.0520670 | 0.4836110  |            |
| 2  | C | 1        |    |   | 1.3613521 |             | 1.2589270    | 0.1285170  | 1.1553690  |            |
| 3  | C | 2        | 1  |   | 1.4367598 | 106.0933364 | 1.1776490    | 1.1607790  | 0.1593230  |            |
| 4  | C | 3        | 2  | 1 | 1.3633249 | 106.1102765 | 0.0945681    | 1.0418100  | 0.5219240  | -1.0373670 |
| 5  | O | 4        | 3  | 2 | 1.3629689 | 110.3554653 | 0.0264895    | 1.0324530  | -0.8288020 | -0.8553340 |
| 6  | H | 1        | 2  | 3 | 1.0760956 | 133.7496311 | -179.9082736 | 1.1780010  | -2.0841420 | 0.7880870  |
| 7  | H | 2        | 1  | 5 | 1.0776579 | 126.4361433 | 179.9697805  | 1.3716430  | 0.2521430  | 2.2199620  |
| 8  | H | 3        | 2  | 1 | 1.0781321 | 127.5494588 | -179.2315472 | 1.2251550  | 2.2269090  | 0.3125510  |
| 9  | H | 4        | 3  | 2 | 1.0762235 | 133.7097082 | 179.9458647  | 0.9435610  | 0.8605190  | -2.0542040 |
| 10 | C | 5        | 4  | 3 | 3.5588973 | 88.6206819  | 81.5718959   | -2.4132430 | -0.6024260 | 0.0058760  |
| 11 | H | 10       | 5  | 4 | 1.0952793 | 50.3190218  | 108.8505031  | -1.9424990 | -1.0183360 | -0.8913730 |
| 12 | H | 10       | 5  | 4 | 1.0955967 | 80.0913842  | -126.4869347 | -2.0345570 | -1.1388290 | 0.8829170  |
| 13 | H | 10       | 5  | 4 | 1.0894991 | 158.7585546 | 117.1361366  | -3.4891070 | -0.7608800 | -0.0605870 |
| 14 | O | 10       | 5  | 4 | 1.4213835 | 86.5804169  | -13.5882735  | -2.2067380 | 0.7997780  | 0.1131640  |
| 15 | H | 14       | 10 | 5 | 0.9619970 | 107.6971223 | -14.5821229  | -1.2576110 | 0.9544440  | 0.1391360  |



S1.1.7 Furan  $\pi$ -bonded low TS PiloTS

up to table of contents

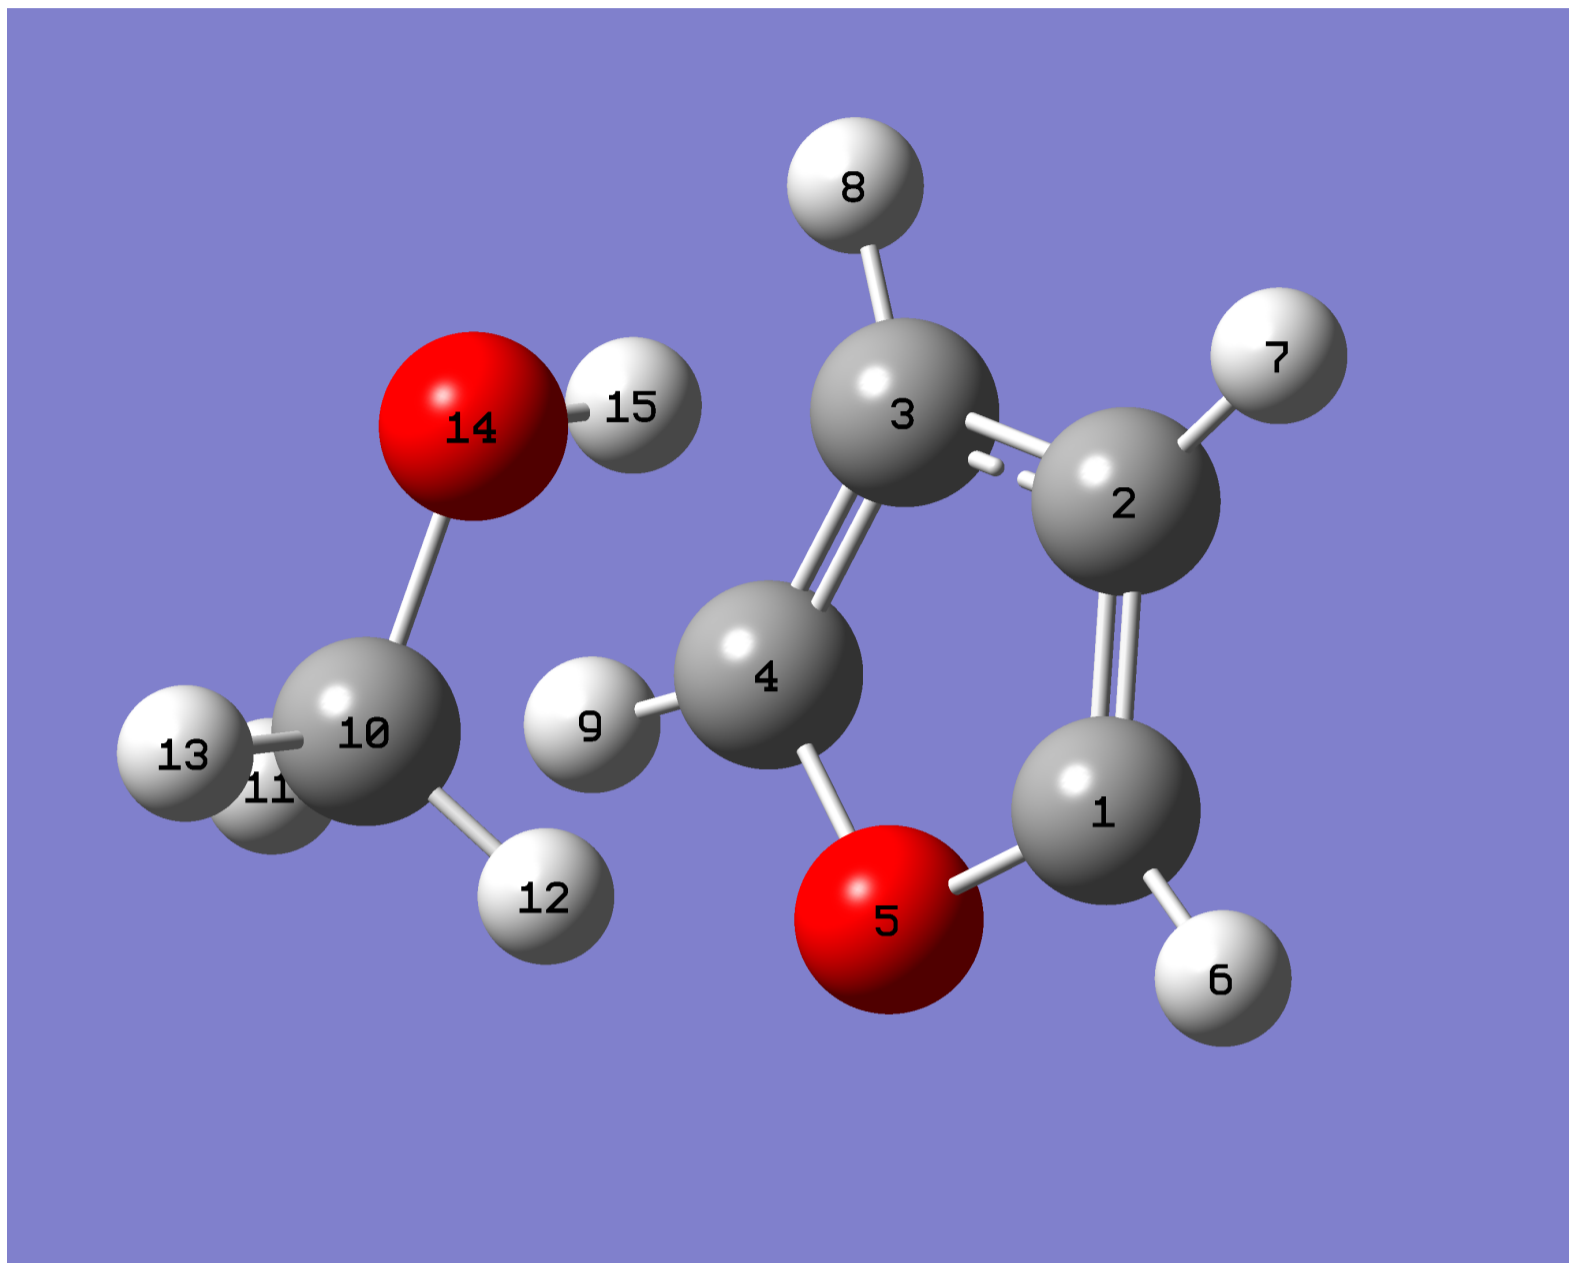

Figure S7:  $\pi$ -bonded methanol – furan transition state of lowest energy.

Table S7:  $\pi$ -bonded methanol – furan transition state of lowest energy.

| #  | N | ref atom |    |   | Bond      | Angle       | Dihedral     | X          | Y          | Z          |
|----|---|----------|----|---|-----------|-------------|--------------|------------|------------|------------|
|    |   | A        | B  | C |           |             |              |            |            |            |
| 1  | C |          |    |   |           |             | 1.1249970    | -0.3699930 | 1.0960270  |            |
| 2  | C | 1        |    |   | 1.3624785 |             | 1.1490690    | 0.9389380  | 0.7185780  |            |
| 3  | C | 2        | 1  |   | 1.4373030 | 106.0786341 | 1.1490730    | 0.9388260  | -0.7187250 |            |
| 4  | C | 3        | 2  | 1 | 1.3624786 | 106.0786266 | 0.0000000    | 1.1250040  | -0.3701640 | -1.0959700 |
| 5  | O | 1        | 2  | 3 | 1.3630754 | 110.4015296 | 0.0066087    | 1.1102470  | -1.1803530 | 0.0000920  |
| 6  | H | 1        | 2  | 3 | 1.0761103 | 133.6909676 | 179.9533050  | 1.1164580  | -0.8686090 | 2.0496110  |
| 7  | H | 2        | 1  | 5 | 1.0779151 | 126.3521864 | -179.5799579 | 1.1710390  | 1.7930980  | 1.3757150  |
| 8  | H | 3        | 2  | 1 | 1.0779154 | 127.5677121 | -179.5800922 | 1.1710440  | 1.7928840  | -1.3759950 |
| 9  | H | 4        | 3  | 2 | 1.0761106 | 133.6909152 | -179.9533539 | 1.1164700  | -0.8689280 | -2.0494770 |
| 10 | C | 5        | 1  | 2 | 3.5478124 | 85.1284915  | -83.3909127  | -2.3913740 | -0.6097190 | 0.0000050  |
| 11 | H | 10       | 5  | 1 | 1.0955564 | 62.5062423  | 167.4486250  | -1.9548780 | -1.0758600 | -0.8901790 |
| 12 | H | 10       | 5  | 1 | 1.0955568 | 62.5038201  | -59.8530341  | -1.9548770 | -1.0758390 | 0.8902000  |
| 13 | H | 10       | 5  | 1 | 1.0894400 | 160.7546016 | -126.1981023 | -3.4642970 | -0.7987050 | 0.0000080  |
| 14 | O | 10       | 5  | 1 | 1.4205703 | 92.2787175  | 53.7980250   | -2.2188160 | 0.8003320  | -0.0000120 |
| 15 | H | 14       | 10 | 5 | 0.9617409 | 107.4289964 | 0.0009763    | -1.2730330 | 0.9748030  | -0.0000090 |

### S1.1.8 Furan $\pi$ -bonded high TS PihITS

up to table of contents

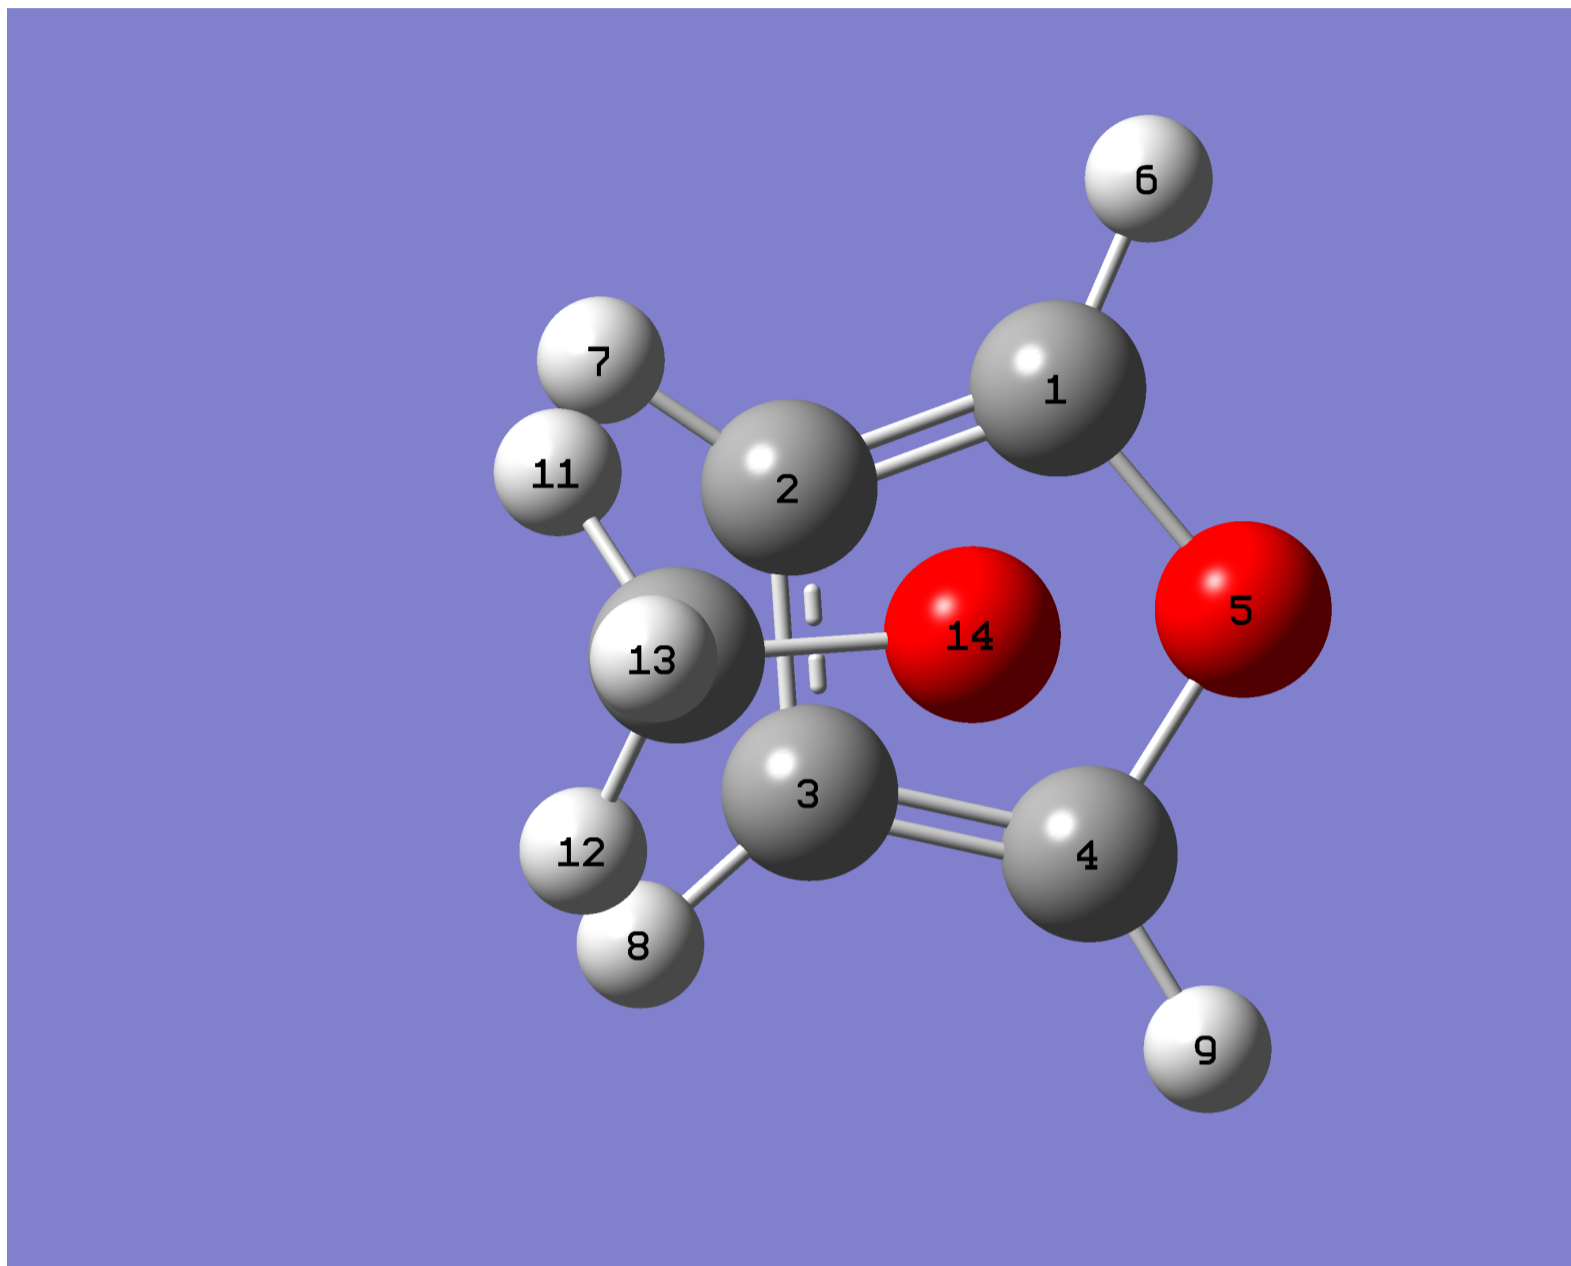

Figure S8:  $\pi$ -bonded methanol – furan transition state of highest energy.

Table S8:  $\pi$ -bonded methanol – furan transition state of highest energy.

| #  | N | ref atom |    |   | Bond      | Angle       | Dihedral     | X          | Y          | Z          |
|----|---|----------|----|---|-----------|-------------|--------------|------------|------------|------------|
|    |   | A        | B  | C |           |             |              |            |            |            |
| 1  | C |          |    |   |           |             | -1.3988190   | 1.0962610  | -0.1636310 |            |
| 2  | C | 1        |    |   | 1.3623181 |             | -0.7388580   | 0.7184740  | 0.9666960  |            |
| 3  | C | 2        | 1  |   | 1.4369410 | 106.1000269 | -0.7388570   | -0.7184670 | 0.9667010  |            |
| 4  | C | 3        | 2  | 1 | 1.3623186 | 106.1000304 | 0.0000000    | -1.3988190 | -1.0962630 | -0.1636230 |
| 5  | O | 1        | 2  | 3 | 1.3633775 | 110.3786886 | -0.0360477   | -1.8068210 | -0.0000030 | -0.8640150 |
| 6  | H | 1        | 2  | 3 | 1.0760463 | 133.7396491 | -179.7277782 | -1.6473290 | 2.0495020  | -0.5965860 |
| 7  | H | 2        | 1  | 5 | 1.0778149 | 126.3273113 | -179.7299278 | -0.3121380 | 1.3756810  | 1.7067460  |
| 8  | H | 3        | 2  | 1 | 1.0778142 | 127.5719416 | -179.6887450 | -0.3121380 | -1.3756690 | 1.7067550  |
| 9  | H | 4        | 3  | 2 | 1.0760457 | 133.7397434 | 179.7277962  | -1.6473290 | -2.0495060 | -0.5965720 |
| 10 | C | 3        | 2  | 1 | 3.7106801 | 78.8357853  | 109.1581720  | 2.8332410  | 0.0000010  | 0.2645140  |
| 11 | H | 10       | 3  | 2 | 1.0960485 | 82.9401057  | 30.7416165   | 2.6331900  | 0.8911190  | 0.8704930  |
| 12 | H | 10       | 3  | 2 | 1.0960489 | 64.0398513  | 145.6516431  | 2.6331910  | -0.8911130 | 0.8705000  |
| 13 | H | 10       | 3  | 2 | 1.0894461 | 168.2950173 | -162.2854361 | 3.8872190  | 0.0000000  | -0.0112090 |
| 14 | O | 10       | 3  | 2 | 1.4191961 | 69.9174774  | -85.8622579  | 2.0894290  | -0.0000030 | -0.9441470 |
| 15 | H | 14       | 10 | 3 | 0.9615428 | 107.4387918 | 11.8971771   | 1.1571400  | -0.0000030 | -0.7087710 |

## S1.2 Methanol – 2-methylfuran system

### S1.2.1 2-methylfuran OH top Ot

up to table of contents

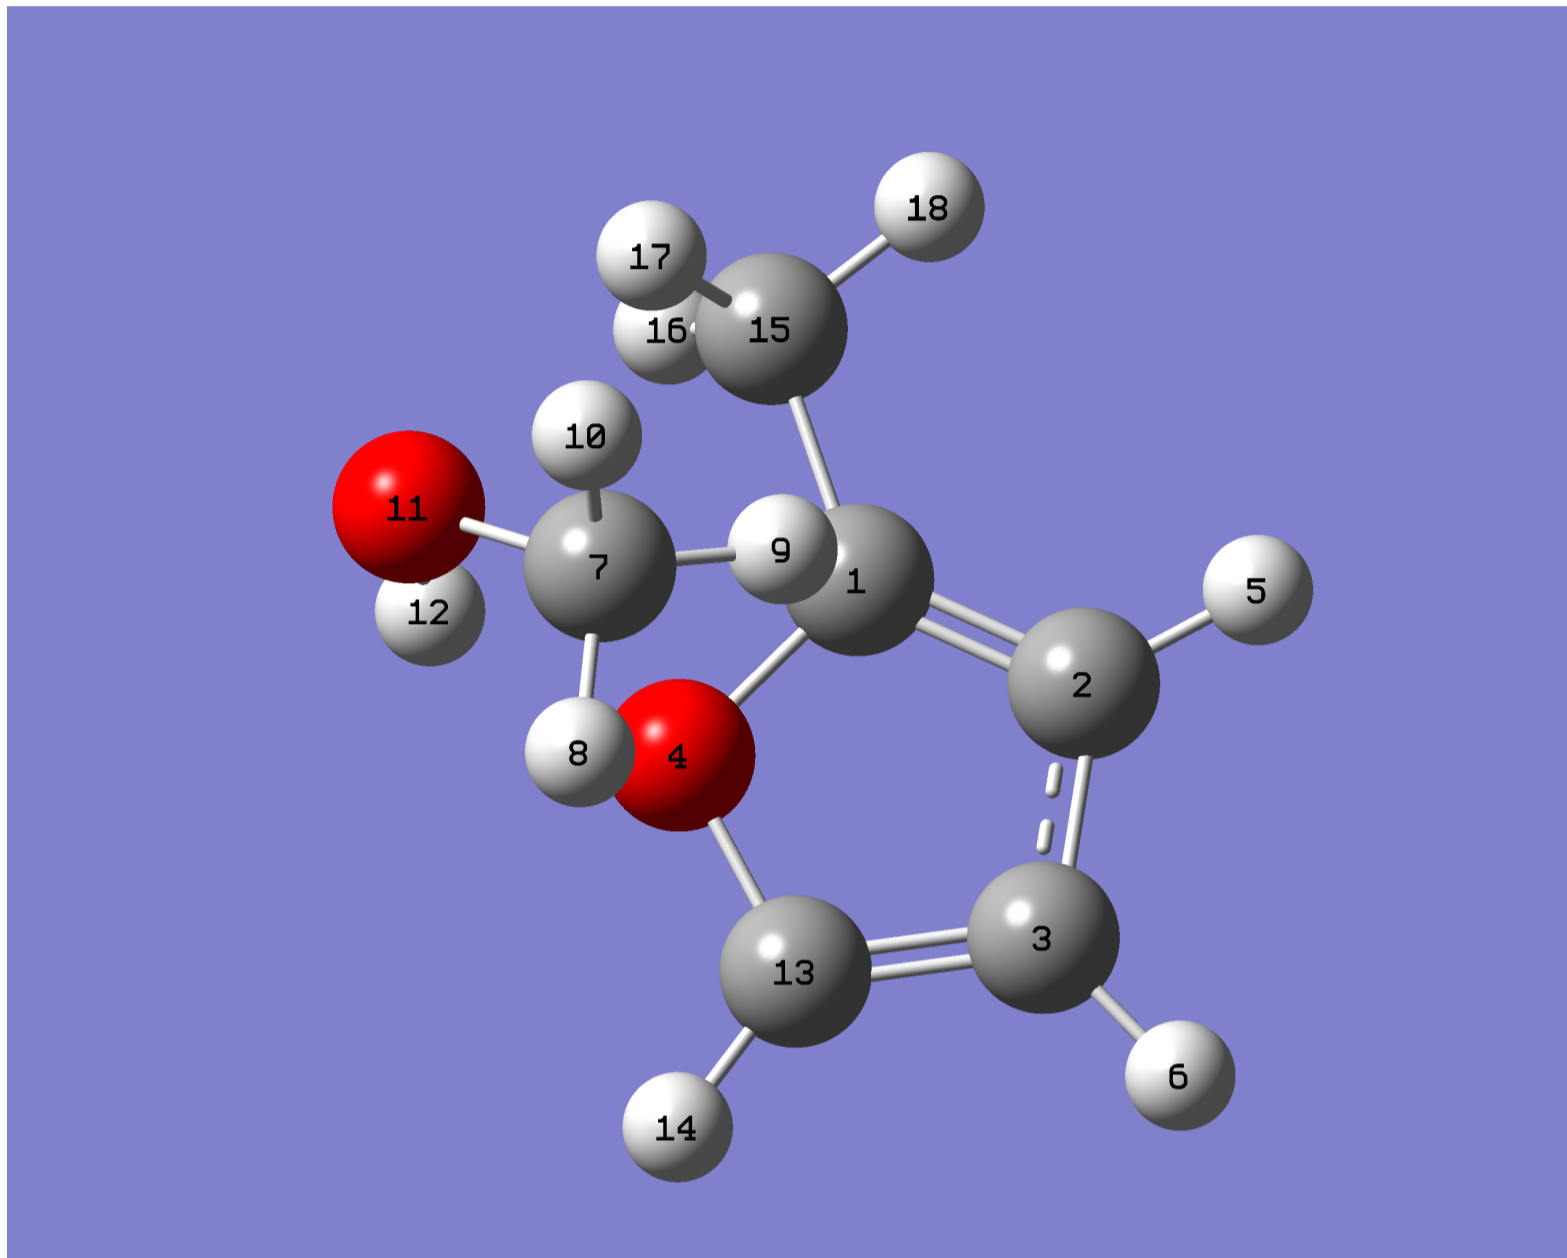

Figure S9: OH-bonded methanol – 2-methylfuran structure in top conformation Ot.

Table S9: Methanol – 2-methylfuran Ot

| #  | N | ref atom |   |   | Bond      | Angle       | Dihedral     | X          | Y          | Z          |
|----|---|----------|---|---|-----------|-------------|--------------|------------|------------|------------|
|    |   | A        | B | C |           |             |              |            |            |            |
| 1  | C |          |   |   |           |             | 0.8233210    | 0.7861660  | 0.0135940  |            |
| 2  | C | 1        |   |   | 1.3628783 |             | 1.6966520    | 0.1481510  | 0.8428510  |            |
| 3  | C | 2        | 1 |   | 1.4369167 | 106.9706862 | 1.8220460    | -1.2003180 | 0.3626040  |            |
| 4  | O | 1        | 2 | 3 | 1.3755721 | 109.2580843 | 0.0288484    | 0.3966330  | -0.0902520 | -0.9569870 |
| 5  | H | 2        | 1 | 4 | 1.0781380 | 125.7320405 | 179.8406558  | 2.1935970  | 0.5878750  | 1.6925980  |
| 6  | H | 3        | 2 | 1 | 1.0779235 | 127.5327192 | 179.8017802  | 2.4315270  | -1.9893350 | 0.7723650  |
| 7  | C | 4        | 1 | 2 | 3.3047572 | 90.4895049  | 96.8646438   | -2.3327060 | -0.7398750 | 0.7894720  |
| 8  | H | 7        | 4 | 1 | 1.0954943 | 94.1741487  | -139.8394549 | -2.3166860 | -1.8123150 | 0.5664840  |
| 9  | H | 7        | 4 | 1 | 1.0956836 | 61.0104214  | -30.7537647  | -1.4114730 | -0.4780310 | 1.3217220  |
| 10 | H | 7        | 4 | 1 | 1.0895384 | 157.3104673 | 37.1506473   | -3.1820150 | -0.5350860 | 1.4404940  |
| 11 | O | 7        | 4 | 1 | 1.4223350 | 63.7663653  | 107.6986532  | -2.5088840 | 0.0447850  | -0.3836890 |
| 12 | H | 11       | 7 | 4 | 0.9623241 | 107.1915715 | 16.6592968   | -1.7174630 | -0.0641100 | -0.9202170 |
| 13 | C | 3        | 2 | 1 | 1.3583019 | 106.2390999 | -0.0045850   | 1.0161250  | -1.2919920 | -0.7269240 |
| 14 | H | 13       | 3 | 2 | 1.0762071 | 134.0583954 | 179.5492588  | 0.7806590  | -2.0815260 | -1.4193210 |
| 15 | C | 1        | 2 | 3 | 1.4858498 | 134.1919629 | 179.6301195  | 0.2655240  | 2.1621990  | -0.0424890 |
| 16 | H | 15       | 1 | 2 | 1.0931300 | 111.0439109 | 119.3280353  | 0.5310440  | 2.6554240  | -0.9811910 |
| 17 | H | 15       | 1 | 2 | 1.0928293 | 110.8596186 | -120.4426631 | -0.8243550 | 2.1437720  | 0.0356140  |
| 18 | H | 15       | 1 | 2 | 1.0901392 | 109.4697706 | -0.3775280   | 0.6674000  | 2.7510700  | 0.7822110  |

### S1.2.2 2-methylfuran OH transition state OloTS

up to table of contents

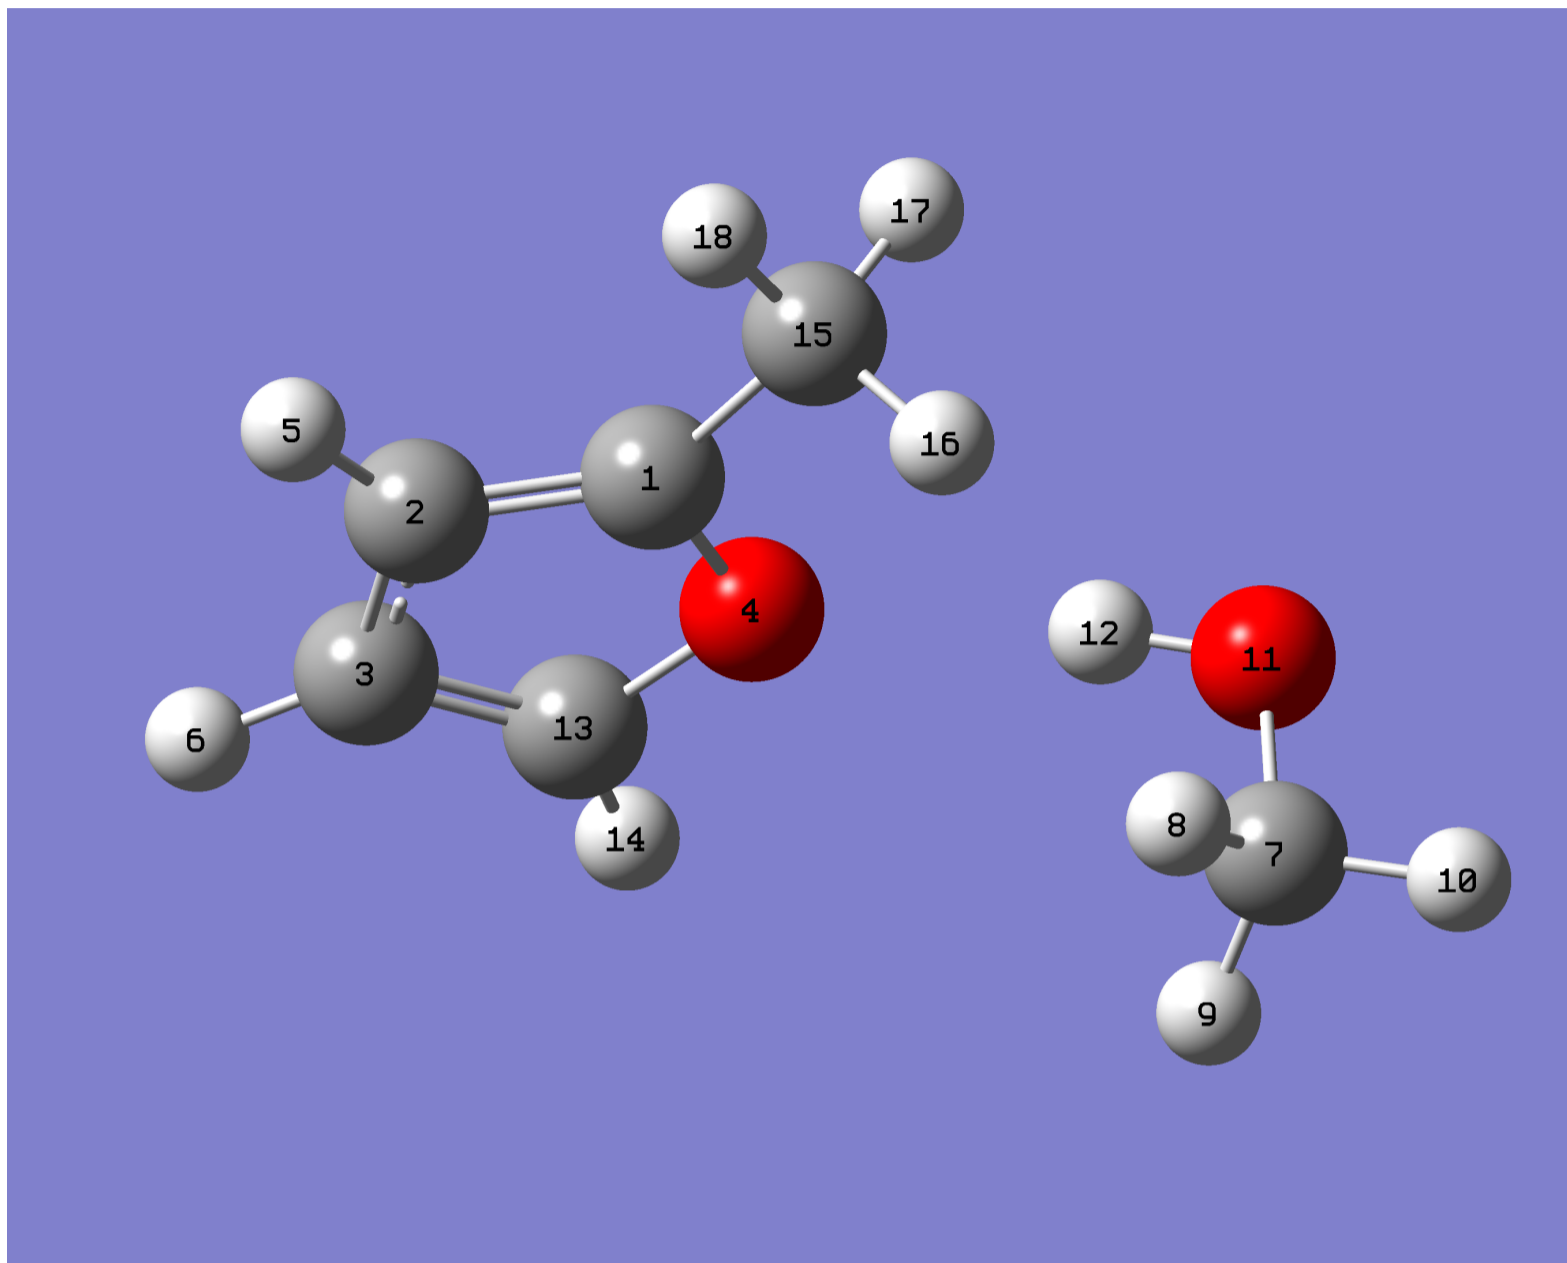

Figure S10: OH-bonded methanol – 2-methylfuran transition state with lowest energy.

Table S10: OH-bonded methanol – 2-methylfuran transition state with lowest energy.

| #  | ref atom |    |   |   | Bond      | Angle       | Dihedral     | X          | Y          | Z          |
|----|----------|----|---|---|-----------|-------------|--------------|------------|------------|------------|
|    | N        | A  | B | C |           |             |              |            |            |            |
| 1  | C        |    |   |   |           |             | -0.9461110   | 0.7494900  | -0.0203550 |            |
| 2  | C        | 1  |   |   | 1.3622866 |             | -2.2221310   | 0.4263350  | 0.3305990  |            |
| 3  | C        | 2  | 1 |   | 1.4372750 | 106.9772756 | -2.3453260   | -0.9995680 | 0.1987540  |            |
| 4  | O        | 1  | 2 | 3 | 1.3751583 | 109.1880279 | -0.0070532   | -0.2677090 | -0.3964510 | -0.3633570 |
| 5  | H        | 2  | 1 | 4 | 1.0780436 | 125.7470190 | -179.9246844 | -2.9842050 | 1.1212870  | 0.6443870  |
| 6  | H        | 3  | 2 | 1 | 1.0778415 | 127.5042114 | -179.9071192 | -3.2170060 | -1.6035240 | 0.3915060  |
| 7  | C        | 4  | 1 | 2 | 3.4262627 | 112.9588024 | -141.4009385 | 2.9843420  | -0.3978860 | 0.7152710  |
| 8  | H        | 7  | 4 | 1 | 1.0967123 | 74.0191969  | 25.0316734   | 2.4428990  | 0.2766800  | 1.3894950  |
| 9  | H        | 7  | 4 | 1 | 1.0960157 | 85.5241468  | 135.7242486  | 2.7903270  | -1.4305210 | 1.0271580  |
| 10 | H        | 7  | 4 | 1 | 1.0896569 | 163.5380330 | -75.7328755  | 4.0513210  | -0.2020490 | 0.8180130  |
| 11 | O        | 7  | 4 | 1 | 1.4187508 | 58.1465759  | -104.6896214 | 2.6467680  | -0.1777500 | -0.6450370 |
| 12 | H        | 11 | 7 | 4 | 0.9632075 | 107.3816102 | -6.9948877   | 1.7000380  | -0.3306770 | -0.7349500 |
| 13 | C        | 3  | 2 | 1 | 1.3578738 | 106.2906457 | -0.0243331   | -1.1357930 | -1.4488880 | -0.2242860 |
| 14 | H        | 13 | 3 | 2 | 1.0760655 | 134.1682389 | -179.7959248 | -0.7385850 | -2.4198110 | -0.4639760 |
| 15 | C        | 1  | 2 | 3 | 1.4859332 | 134.2164211 | 179.8203521  | -0.1855560 | 2.0232480  | -0.1045810 |
| 16 | H        | 15 | 1 | 2 | 1.0927529 | 111.3553971 | 119.3203784  | 0.6780090  | 2.0161040  | 0.5649810  |
| 17 | H        | 15 | 1 | 2 | 1.0926210 | 111.2025117 | -120.6344409 | 0.1829430  | 2.1971700  | -1.1183760 |
| 18 | H        | 15 | 1 | 2 | 1.0900487 | 109.4338034 | -0.6537383   | -0.8347510 | 2.8525560  | 0.1764890  |

### S1.2.3 2-methylfuran OH planar Op

up to table of contents

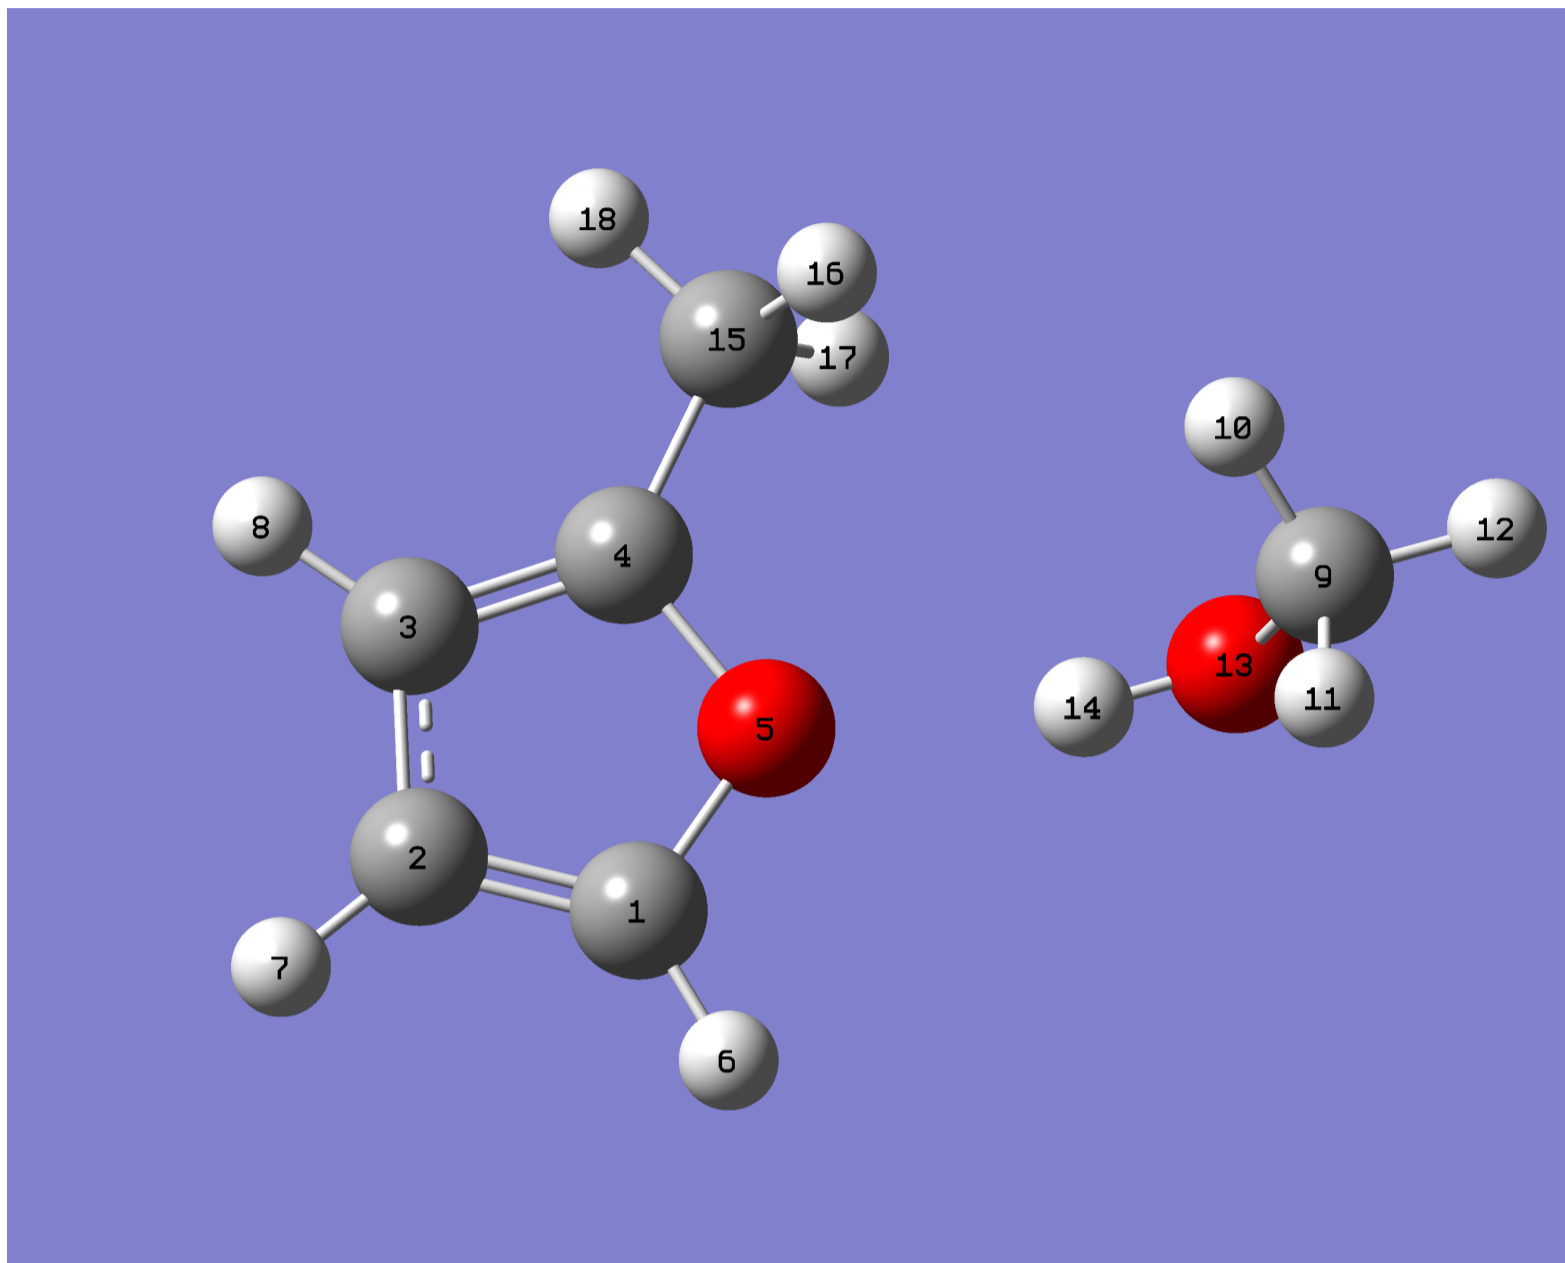

Figure S11: OH-bonded methanol – 2-methylfuran structure in planar conformation Op.

Table S11: Methanol – 2-methylfuran Op

| #  | N | ref atom |   |   | Bond      | Angle       | Dihedral     | X          | Y          | Z          |
|----|---|----------|---|---|-----------|-------------|--------------|------------|------------|------------|
|    |   | A        | B | C |           |             |              |            |            |            |
| 1  | C |          |   |   |           |             | -1.2239690   | -1.4530480 | 0.0135200  |            |
| 2  | C | 1        |   |   | 1.3577340 |             | -2.4665860   | -0.9089770 | 0.0712380  |            |
| 3  | C | 2        | 1 |   | 1.4373426 | 106.3034226 | -2.2836460   | 0.5166520  | 0.0629570  |            |
| 4  | C | 3        | 2 | 1 | 1.3621036 | 106.9802515 | 0.0099203    | -0.9423090 | 0.7452260  | 0.0005450  |
| 5  | O | 1        | 2 | 3 | 1.3716503 | 109.9633127 | 0.0378043    | -0.2792560 | -0.4595150 | -0.0293070 |
| 6  | H | 1        | 2 | 3 | 1.0760363 | 134.1783084 | -179.7003652 | -0.8467590 | -2.4605680 | -0.0081620 |
| 7  | H | 2        | 1 | 5 | 1.0778355 | 126.1973040 | 179.9817245  | -3.3973680 | -1.4508160 | 0.1134830  |
| 8  | H | 3        | 2 | 1 | 1.0780416 | 127.2730505 | 179.9622150  | -3.0505310 | 1.2735060  | 0.0980720  |
| 9  | C | 5        | 1 | 2 | 3.5042250 | 135.5161795 | 162.5769665  | 3.1716290  | -0.2643980 | 0.5476810  |
| 10 | H | 9        | 5 | 1 | 1.0966420 | 77.2799972  | -132.3813830 | 2.7831350  | 0.5892130  | 1.1160510  |
| 11 | H | 9        | 5 | 1 | 1.0959115 | 85.4295841  | -22.1602938  | 3.0344660  | -1.1729760 | 1.1449200  |
| 12 | H | 9        | 5 | 1 | 1.0896693 | 161.6171016 | 117.6334093  | 4.2393770  | -0.1137280 | 0.3908630  |
| 13 | O | 9        | 5 | 1 | 1.4188012 | 55.2466482  | 98.8802029   | 2.5704940  | -0.3705560 | -0.7330860 |
| 14 | H | 13       | 9 | 5 | 0.9633401 | 107.5497355 | -6.4513465   | 1.6265450  | -0.5096630 | -0.6002940 |
| 15 | C | 4        | 3 | 2 | 1.4859542 | 134.2529128 | -179.7789498 | -0.0993920 | 1.9684720  | -0.0343860 |
| 16 | H | 15       | 4 | 3 | 1.0933461 | 111.1772958 | 116.2975342  | 0.5391230  | 2.0335620  | 0.8507510  |
| 17 | H | 15       | 4 | 3 | 1.0924948 | 111.2281153 | -123.5198317 | 0.5473380  | 1.9782070  | -0.9148350 |
| 18 | H | 15       | 4 | 3 | 1.0900169 | 109.4732252 | -3.3639008   | -0.7395890 | 2.8502740  | -0.0610290 |

### S1.2.4 2-methylfuran OH transition state OmedTS

up to table of contents

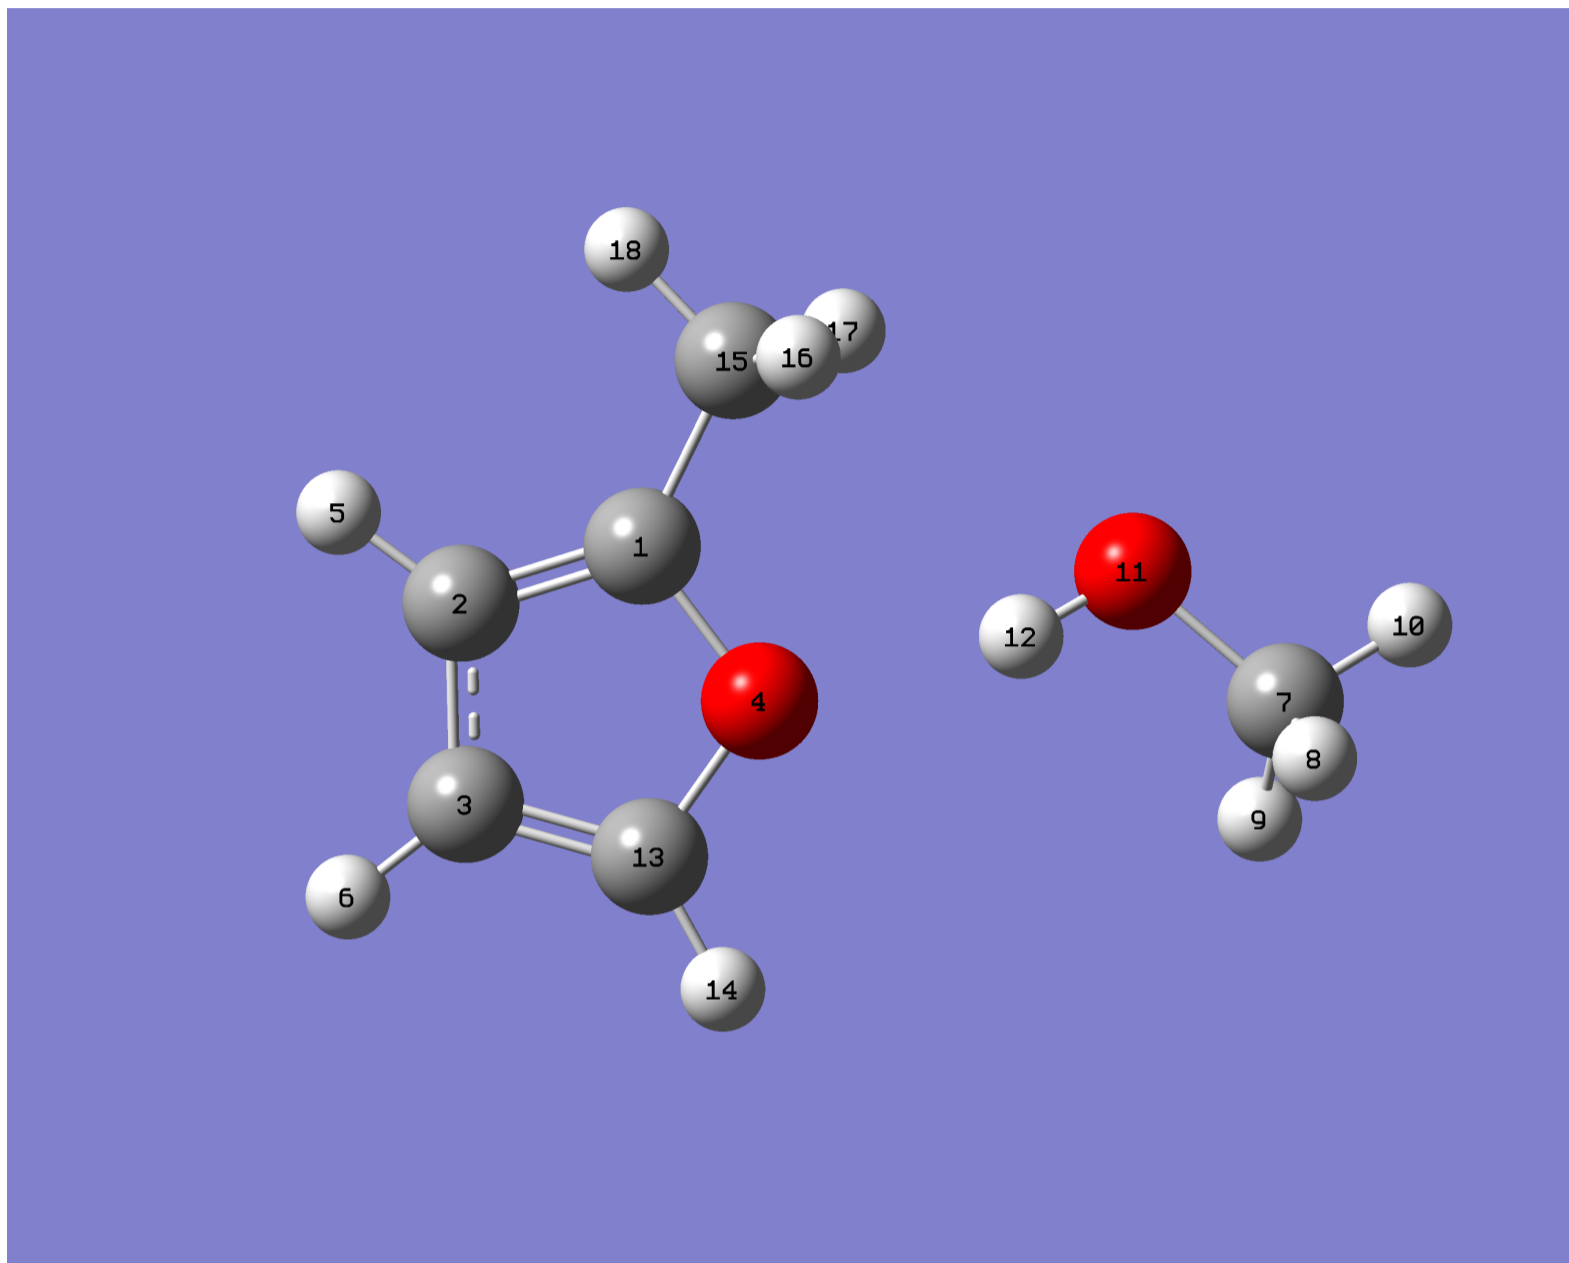

Figure S12: OH-bonded methanol – 2-methylfuran transition state with medium energy.

Table S12: OH-bonded methanol – 2-methylfuran transition state with medium energy.

| #  | N | ref atom |   |   | Bond      | Angle       | Dihedral     | X          | Y          | Z          |
|----|---|----------|---|---|-----------|-------------|--------------|------------|------------|------------|
|    |   | A        | B | C |           |             |              |            |            |            |
| 1  | C |          |   |   |           |             | -1.0885510   | 0.7142490  | 0.0543410  |            |
| 2  | C | 1        |   |   | 1.3621965 |             | -2.3414910   | 0.2879950  | -0.2681930 |            |
| 3  | C | 2        | 1 |   | 1.4372184 | 107.0269490 | -2.3330980   | -1.1466270 | -0.1822510 |            |
| 4  | O | 1        | 2 | 3 | 1.3764705 | 109.1553546 | -0.0385178   | -0.2991470 | -0.3771750 | 0.3377240  |
| 5  | H | 2        | 1 | 4 | 1.0780317 | 125.7053390 | 179.9252621  | -3.1722630 | 0.9211330  | -0.5348510 |
| 6  | H | 3        | 2 | 1 | 1.0779008 | 127.5144546 | 179.9519607  | -3.1534510 | -1.8202430 | -0.3696880 |
| 7  | C | 4        | 1 | 2 | 3.8267156 | 126.4161011 | 153.7791051  | 3.5064800  | -0.5795940 | -0.0086600 |
| 8  | H | 7        | 4 | 1 | 1.0961018 | 88.3713507  | 120.0324070  | 3.5614370  | -0.7943390 | 1.0647940  |
| 9  | H | 7        | 4 | 1 | 1.0961879 | 89.3262995  | -131.1379780 | 3.3937430  | -1.5245760 | -0.5526520 |
| 10 | H | 7        | 4 | 1 | 1.0895460 | 149.2785314 | -4.6249901   | 4.4449820  | -0.1184470 | -0.3147120 |
| 11 | O | 7        | 4 | 1 | 1.4190850 | 42.1120734  | -6.2123517   | 2.4688150  | 0.3384730  | -0.3155910 |
| 12 | H | 11       | 7 | 4 | 0.9634177 | 108.3743552 | -0.7696611   | 1.6291870  | -0.0523820 | -0.0502030 |
| 13 | C | 3        | 2 | 1 | 1.3576896 | 106.2823144 | -0.0250909   | -1.0747330 | -1.4985170 | 0.1865470  |
| 14 | H | 13       | 3 | 2 | 1.0760564 | 134.0802060 | 179.9815322  | -0.5855510 | -2.4378490 | 0.3769510  |
| 15 | C | 1        | 2 | 3 | 1.4861223 | 134.2405529 | -179.8525982 | -0.4420190 | 2.0482910  | 0.1586860  |
| 16 | H | 15       | 1 | 2 | 1.0931466 | 111.0927092 | 116.6031404  | -0.1205740 | 2.2505760  | 1.1837340  |
| 17 | H | 15       | 1 | 2 | 1.0923308 | 111.2262775 | -123.4586400 | 0.4389170  | 2.1121880  | -0.4840080 |
| 18 | H | 15       | 1 | 2 | 1.0901047 | 109.3550555 | -3.1329697   | -1.1532980 | 2.8187790  | -0.1392380 |

### S1.2.5 2-methylfuran OH transition state OhITS

up to table of contents

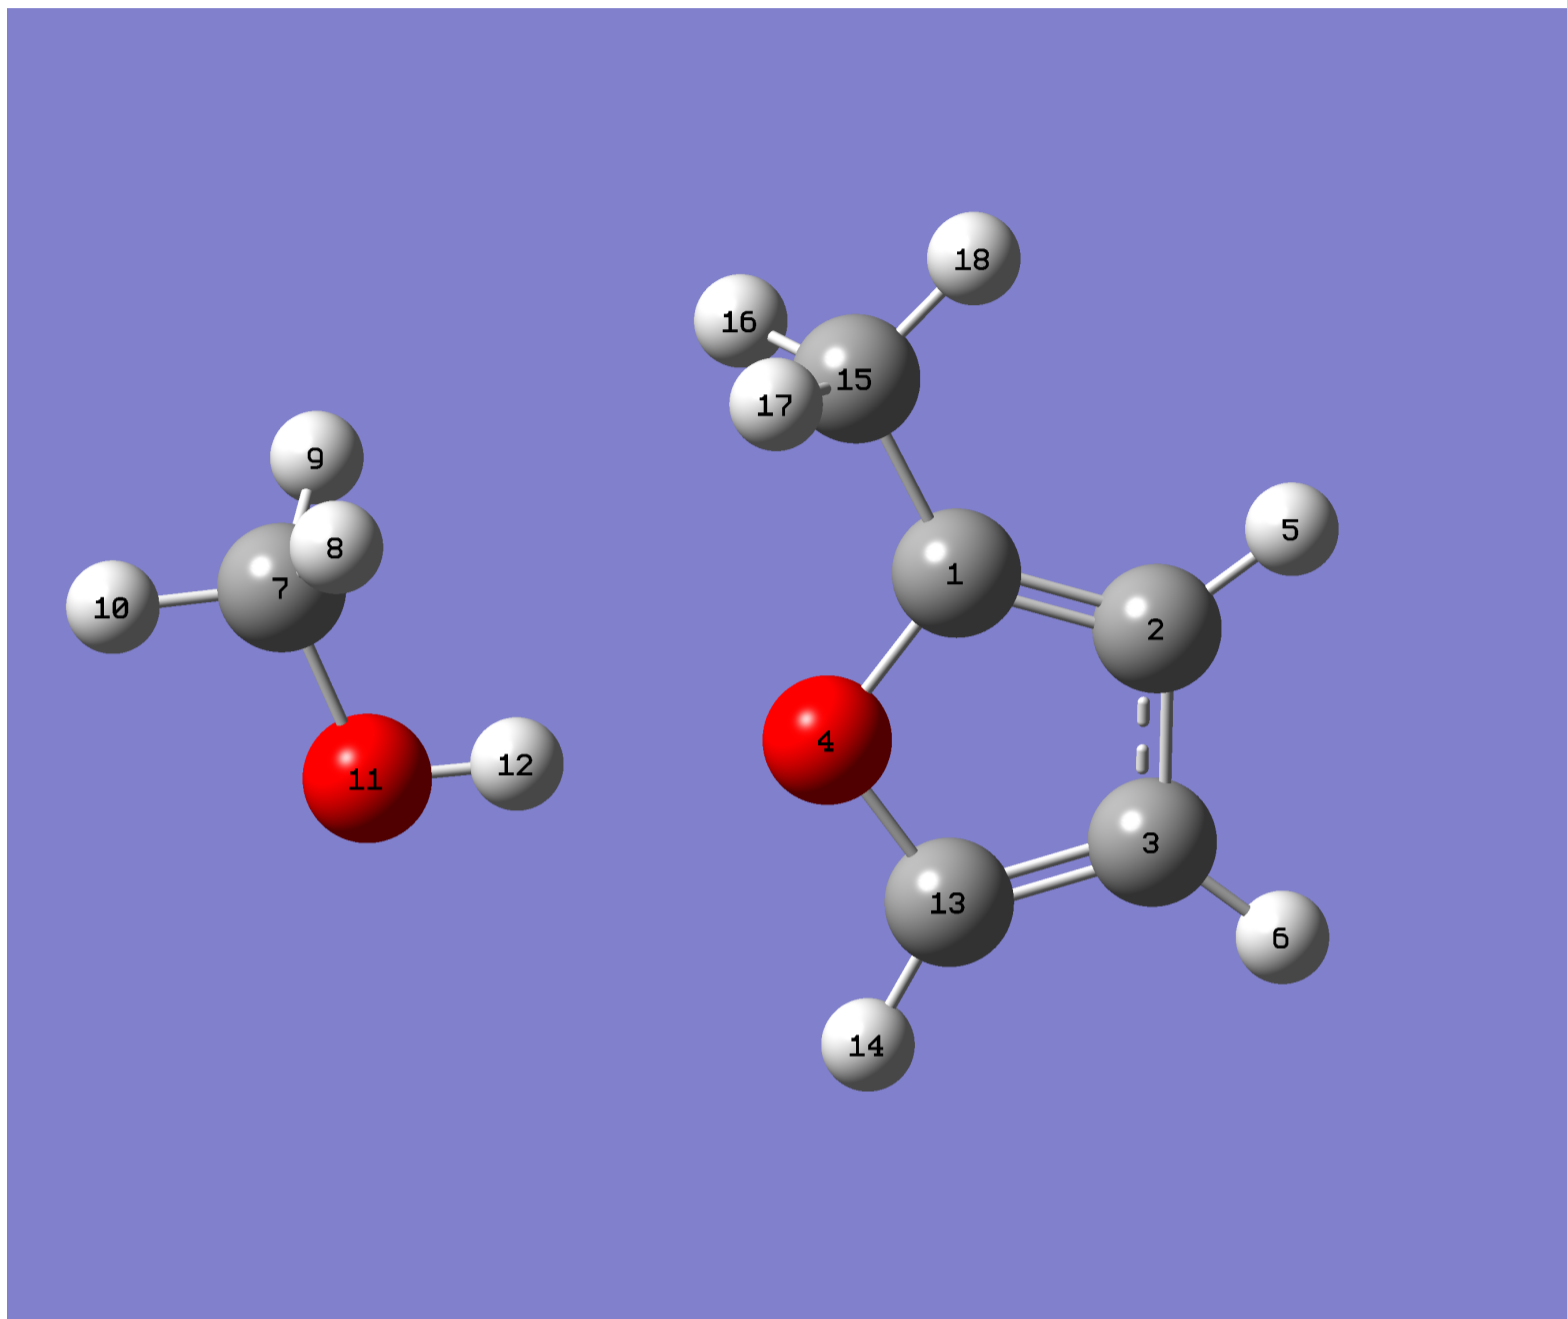

Figure S13: OH-bonded methanol – 2-methylfuran transition state with highest energy.

Table S13: OH-bonded methanol – 2-methylfuran transition state with highest energy.

| #  | N | ref atom |   |   | Bond      | Angle       | Dihedral     | X          | Y          | Z          |
|----|---|----------|---|---|-----------|-------------|--------------|------------|------------|------------|
|    |   | A        | B | C |           |             |              |            |            |            |
| 1  | C |          |   |   |           |             | 0.9878730    | 0.7636710  | 0.0079990  |            |
| 2  | C | 1        |   |   | 1.3620972 |             | 2.3242900    | 0.5088470  | -0.0580540 |            |
| 3  | C | 2        | 1 |   | 1.4373158 | 106.9295314 | 2.4794890    | -0.9199080 | -0.0368590 |            |
| 4  | O | 1        | 2 | 3 | 1.3742104 | 109.2545820 | 0.0492780    | 0.3022910  | -0.4256810 | 0.0702360  |
| 5  | H | 2        | 1 | 4 | 1.0780718 | 125.7788935 | -179.9499792 | 3.1051960  | 1.2499150  | -0.1150000 |
| 6  | H | 3        | 2 | 1 | 1.0777845 | 127.4988071 | -179.9785036 | 3.3992070  | -1.4805820 | -0.0740460 |
| 7  | C | 4        | 1 | 2 | 3.6623147 | 110.1800165 | -175.4536211 | -3.3066970 | 0.1900350  | -0.0227620 |
| 8  | H | 7        | 4 | 1 | 1.0966319 | 82.9564800  | -58.1821012  | -3.0911670 | 0.7884340  | 0.8705840  |
| 9  | H | 7        | 4 | 1 | 1.0967865 | 85.7602440  | 51.2783317   | -3.0978710 | 0.7974790  | -0.9117750 |
| 10 | H | 7        | 4 | 1 | 1.0896585 | 157.1630160 | -179.5104681 | -4.3679850 | -0.0569820 | -0.0203050 |
| 11 | O | 7        | 4 | 1 | 1.4175041 | 50.0150577  | 175.0372995  | -2.5908850 | -1.0334280 | -0.0310940 |
| 12 | H | 11       | 7 | 4 | 0.9633810 | 107.9357180 | -0.9111330   | -1.6500960 | -0.8268520 | -0.0125120 |
| 13 | C | 3        | 2 | 1 | 1.3577830 | 106.3035766 | -0.0378298   | 1.2269900  | -1.4382480 | 0.0415290  |
| 14 | H | 13       | 3 | 2 | 1.0761266 | 134.2660570 | 179.9381523  | 0.8286780  | -2.4370900 | 0.0828900  |
| 15 | C | 1        | 2 | 3 | 1.4857427 | 134.1603796 | 179.8415972  | 0.1704860  | 2.0041830  | 0.0289730  |
| 16 | H | 15       | 1 | 2 | 1.0931429 | 111.2478116 | 120.1608980  | -0.5205450 | 2.0376370  | -0.8173830 |
| 17 | H | 15       | 1 | 2 | 1.0931620 | 111.2500243 | -119.3629722 | -0.4169850 | 2.0760800  | 0.9480550  |
| 18 | H | 15       | 1 | 2 | 1.0900012 | 109.5310514 | 0.4111109    | 0.8257280  | 2.8733470  | -0.0285990 |

### S1.2.6 2-methylfuran transition state between OH- and $\pi$ -bonded conformation

up to table of contents

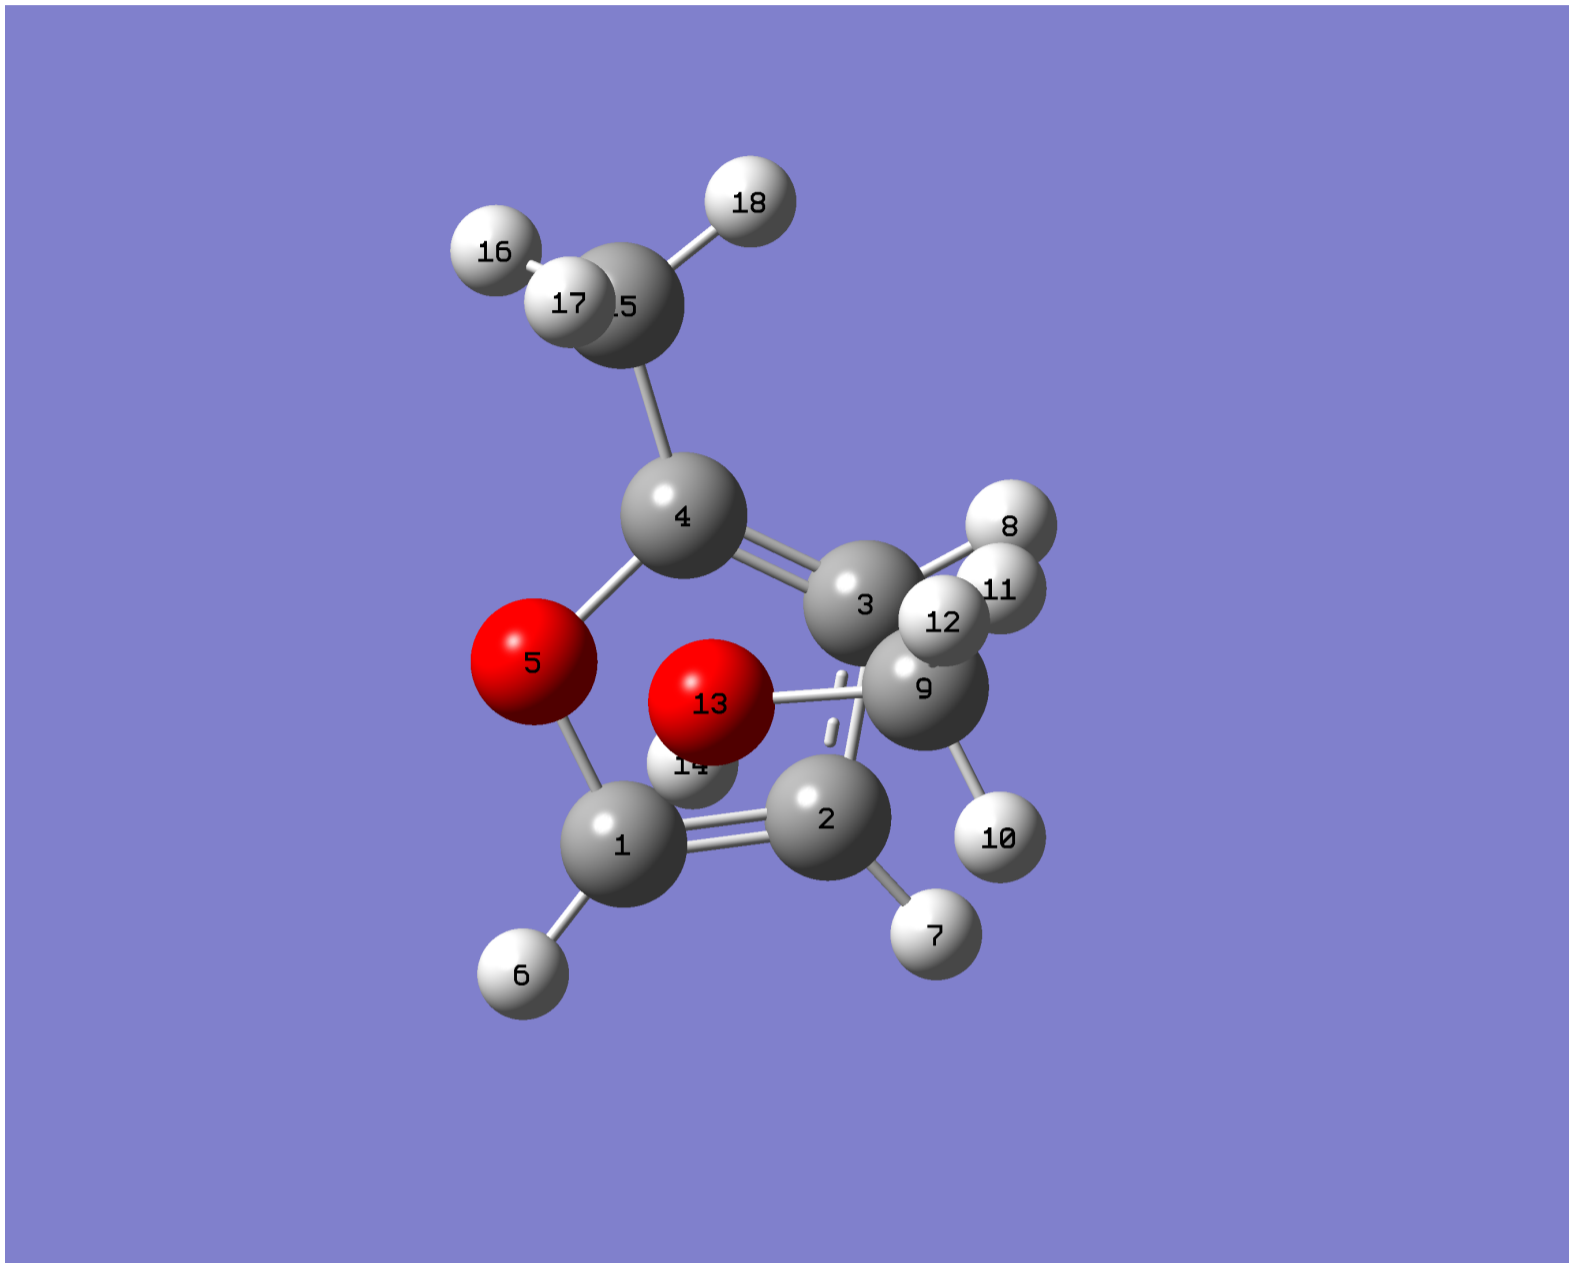

Figure S14: Methanol – 2-methylfuran transition state between OH- and  $\pi$ -bonded conformation.

Table S14: Methanol – 2-methylfuran transition state between OH- and  $\pi$ -bonded conformation.

| #  | N | ref atom |   |   | Bond      | Angle       | Dihedral     | X          | Y          | Z          |
|----|---|----------|---|---|-----------|-------------|--------------|------------|------------|------------|
|    |   | A        | B | C |           |             |              |            |            |            |
| 1  | C |          |   |   |           |             | 1.1023710    | -1.3838780 | -0.6839190 |            |
| 2  | C | 1        |   |   | 1.3615959 |             | 0.8987720    | -1.5494550 | 0.6521480  |            |
| 3  | C | 2        | 1 |   | 1.4363549 | 106.1328167 | 0.8289490    | -0.2285220 | 1.2119480  |            |
| 4  | C | 3        | 2 | 1 | 1.3647120 | 106.7484894 | 0.2490999    | 0.9892560  | 0.6462640  | 0.1768200  |
| 5  | O | 1        | 2 | 3 | 1.3680936 | 110.1054161 | -0.1315719   | 1.1603300  | -0.0515490 | -0.9892390 |
| 6  | H | 1        | 2 | 3 | 1.0763249 | 133.9643932 | 178.4153909  | 1.2409740  | -2.0618680 | -1.5082940 |
| 7  | H | 2        | 1 | 5 | 1.0781456 | 126.2427264 | -179.5494357 | 0.8185880  | -2.4900590 | 1.1729480  |
| 8  | H | 3        | 2 | 1 | 1.0781060 | 127.3569796 | -179.9286262 | 0.6768610  | 0.0366290  | 2.2458130  |
| 9  | C | 3        | 2 | 1 | 3.6743201 | 90.3754275  | 85.6894605   | -2.7556730 | -0.0576160 | 0.4233390  |
| 10 | H | 9        | 3 | 2 | 1.0955522 | 99.8640878  | 36.0986534   | -3.0390030 | -1.0991160 | 0.6110530  |
| 11 | H | 9        | 3 | 2 | 1.0951479 | 45.5268357  | 142.8050700  | -2.1352650 | 0.2944470  | 1.2542990  |
| 12 | H | 9        | 3 | 2 | 1.0895709 | 147.7541864 | -172.4080454 | -3.6624760 | 0.5450300  | 0.3822180  |
| 13 | O | 9        | 3 | 2 | 1.4209169 | 75.1554467  | -74.2407074  | -2.0998960 | 0.0989030  | -0.8274460 |
| 14 | H | 13       | 9 | 3 | 0.9613732 | 107.8486179 | 34.4956302   | -1.3042430 | -0.4404970 | -0.8125340 |
| 15 | C | 4        | 3 | 2 | 1.4847179 | 133.8924524 | 176.4655235  | 0.9529500  | 2.1263100  | 0.0648690  |
| 16 | H | 15       | 4 | 3 | 1.0924948 | 111.1649716 | 127.1621556  | 1.8555140  | 2.5075910  | -0.4183990 |
| 17 | H | 15       | 4 | 3 | 1.0930375 | 110.3964062 | -112.5873654 | 0.0880000  | 2.4427090  | -0.5237600 |
| 18 | H | 15       | 4 | 3 | 1.0902117 | 109.6647084 | 7.0575198    | 0.8778210  | 2.5676870  | 1.0589030  |



S1.2.7 2-methylfuran  $\pi$ -bonded conformation of lowest energy PI

up to table of contents

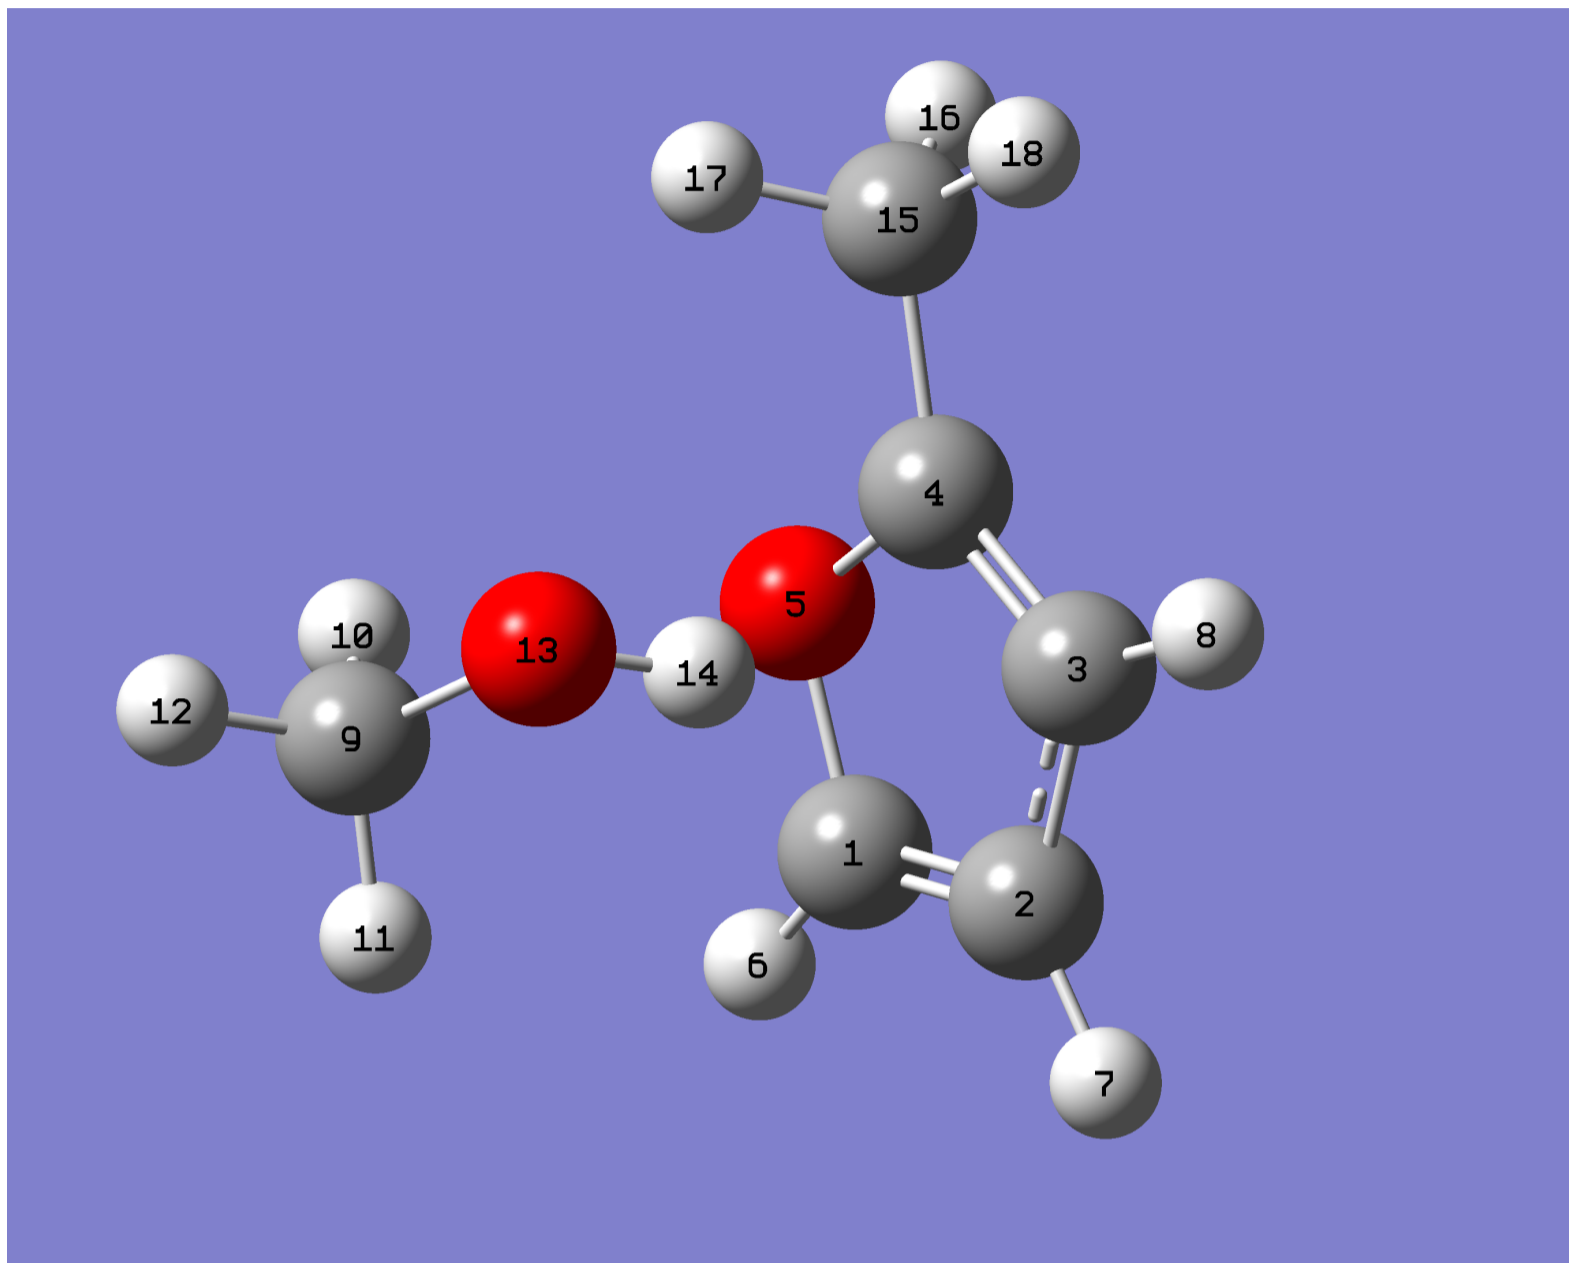

Figure S15:  $\pi$ -bonded methanol – 2-methylfuran structure in lowest-energy conformation.

Table S15:  $\pi$ -bonded methanol – 2-methylfuran structure, lowest-energy conformation.

| #  | N | ref atom |   |   | Bond      | Angle       | Dihedral     | X          | Y          | Z          |
|----|---|----------|---|---|-----------|-------------|--------------|------------|------------|------------|
|    |   | A        | B | C |           |             |              |            |            |            |
| 1  | C |          |   |   |           |             | 0.9528780    | -1.4355590 | -0.6690640 |            |
| 2  | C | 1        |   |   | 1.3598263 |             | 1.0836070    | -1.4847390 | 0.6835700  |            |
| 3  | C | 2        | 1 |   | 1.4377321 | 106.0481361 | 1.0887010    | -0.1188390 | 1.1323070  |            |
| 4  | C | 3        | 2 | 1 | 1.3665082 | 106.7308721 | 0.0186028    | 0.9600940  | 0.6617640  | 0.0180970  |
| 5  | O | 1        | 2 | 3 | 1.3672145 | 110.2572723 | -0.1451021   | 0.8733950  | -0.1372100 | -1.0900720 |
| 6  | H | 1        | 2 | 3 | 1.0761601 | 133.8800448 | 179.8761818  | 0.9014250  | -2.1834190 | -1.4411900 |
| 7  | H | 2        | 1 | 5 | 1.0778855 | 126.4014389 | -179.8466875 | 1.1703910  | -2.3744070 | 1.2858960  |
| 8  | H | 3        | 2 | 1 | 1.0785502 | 127.4202959 | -179.1210992 | 1.1889030  | 0.2378730  | 2.1452170  |
| 9  | C | 5        | 1 | 2 | 3.4965703 | 87.1923567  | -85.8597534  | -2.5621170 | -0.3260000 | -0.4674810 |
| 10 | H | 9        | 5 | 1 | 1.0951562 | 44.2926193  | -130.9017264 | -1.9334220 | 0.0100040  | -1.2988720 |
| 11 | H | 9        | 5 | 1 | 1.0953960 | 89.2198971  | -12.6816391  | -2.4704820 | -1.4136660 | -0.3754050 |
| 12 | H | 9        | 5 | 1 | 1.0895905 | 152.4704100 | -144.2746725 | -3.5998480 | -0.0826540 | -0.6935440 |
| 13 | O | 9        | 5 | 1 | 1.4221955 | 84.3284611  | 99.4079125   | -2.2355100 | 0.3383280  | 0.7468650  |
| 14 | H | 13       | 9 | 5 | 0.9627973 | 107.6876335 | -25.4696020  | -1.3182970 | 0.1327190  | 0.9552490  |
| 15 | C | 4        | 3 | 2 | 1.4855313 | 133.8107959 | 178.8609098  | 0.8763890  | 2.1278480  | -0.2063900 |
| 16 | H | 15       | 4 | 3 | 1.0926415 | 111.0219422 | 123.1967405  | 1.6612720  | 2.4655400  | -0.8874100 |
| 17 | H | 15       | 4 | 3 | 1.0927524 | 110.9103550 | -116.3153328 | -0.0910110 | 2.4023120  | -0.6340750 |
| 18 | H | 15       | 4 | 3 | 1.0899568 | 109.5777821 | 3.1725157    | 0.9906870  | 2.6499040  | 0.7435570  |

S1.2.8 2-methylfuran  $\pi$ -bonded low TS PiloTS

up to table of contents

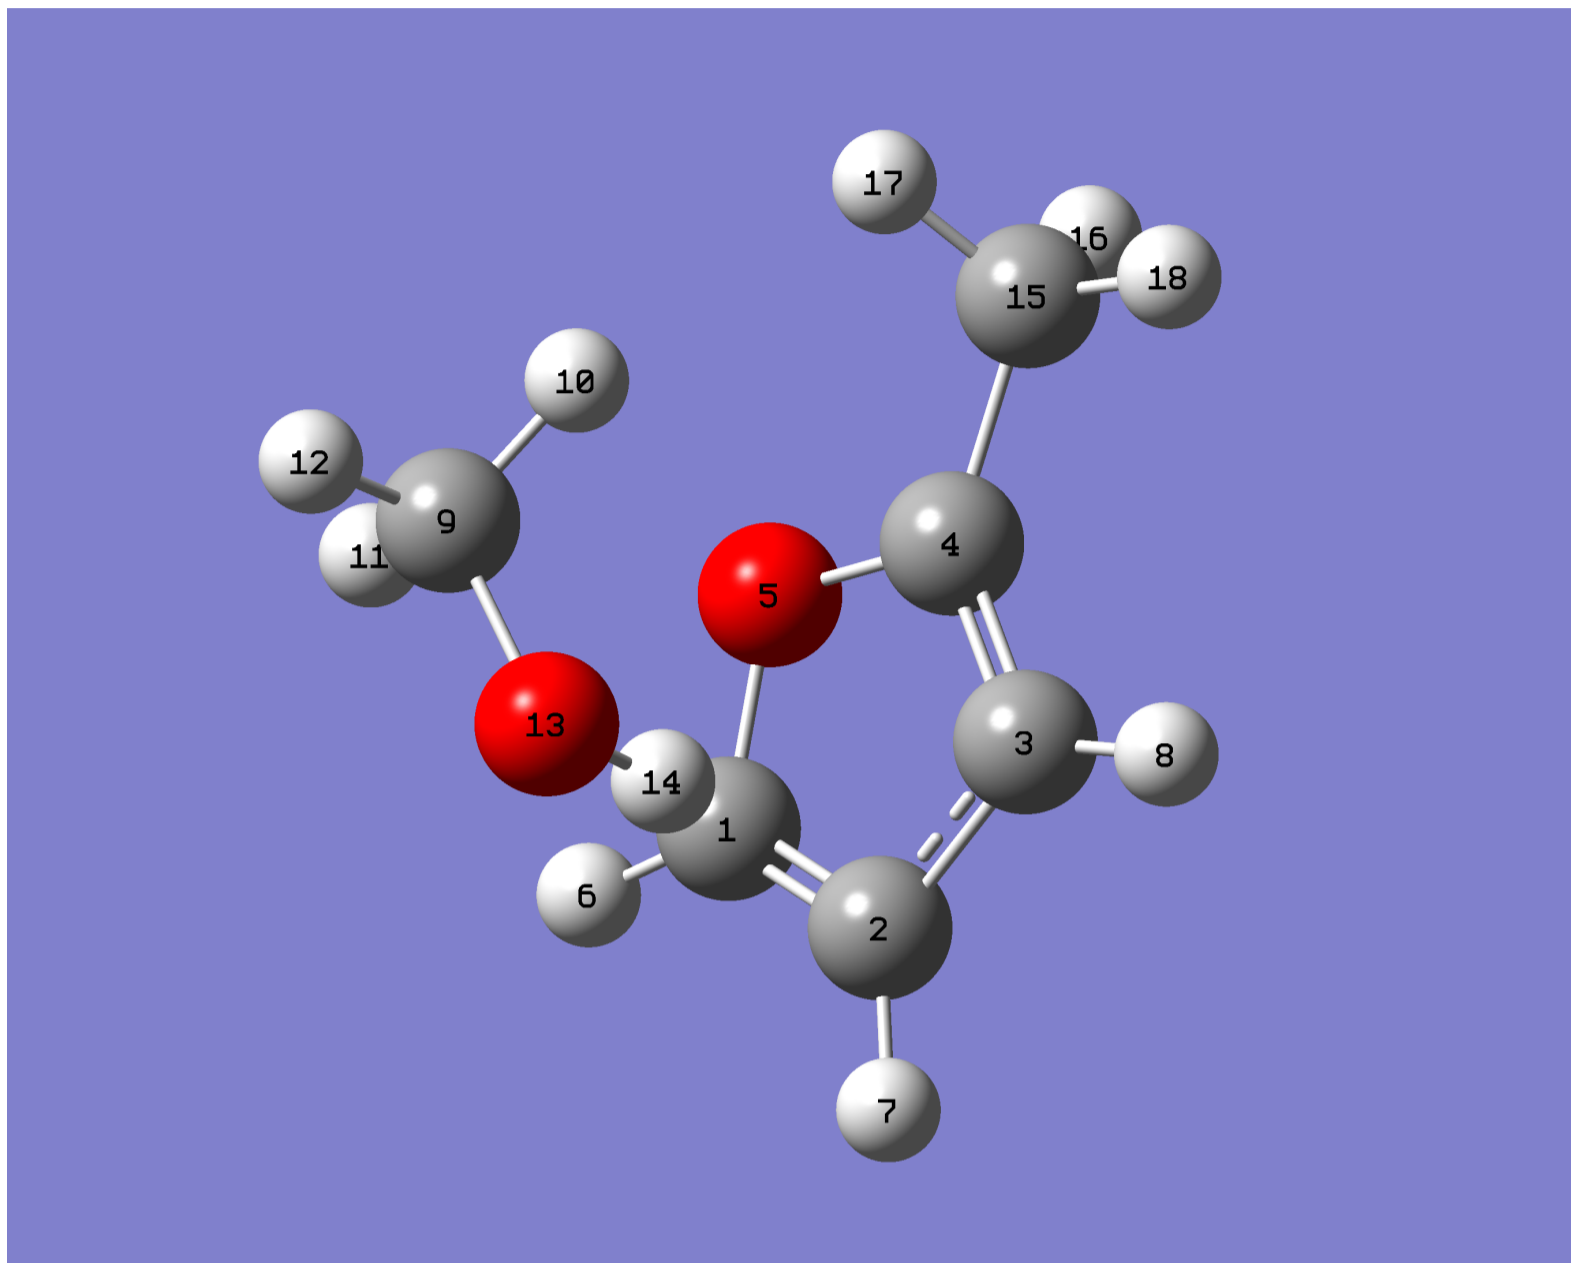

Figure S16:  $\pi$ -bonded methanol – 2-methylfuran transition state of lowest energy.

Table S16:  $\pi$ -bonded methanol – 2-methylfuran transition state of lowest energy.

| #  | N | ref atom |   |   | Bond      | Angle       | Dihedral     | X          | Y          | Z          |
|----|---|----------|---|---|-----------|-------------|--------------|------------|------------|------------|
|    |   | A        | B | C |           |             |              |            |            |            |
| 1  | C |          |   |   |           |             | 0.5944270    | -1.4140800 | -0.8804240 |            |
| 2  | C | 1        |   |   | 1.3612674 |             | 0.5356910    | -1.6907560 | 0.4511350  |            |
| 3  | C | 2        | 1 |   | 1.4380496 | 106.0370984 | 0.8964850    | -0.4733140 | 1.1261530  |            |
| 4  | C | 3        | 2 | 1 | 1.3651899 | 106.6883387 | -0.1058939   | 1.1501820  | 0.4526860  | 0.1556350  |
| 5  | O | 1        | 2 | 3 | 1.3657140 | 110.2279048 | 0.0900834    | 0.9671630  | -0.1149710 | -1.0767870 |
| 6  | H | 1        | 2 | 3 | 1.0761709 | 133.8093541 | -179.9443435 | 0.4134790  | -1.9919250 | -1.7700850 |
| 7  | H | 2        | 1 | 5 | 1.0781926 | 126.3185877 | -179.4476908 | 0.2773200  | -2.6384620 | 0.8956540  |
| 8  | H | 3        | 2 | 1 | 1.0782216 | 127.3866979 | -179.7701254 | 0.9637980  | -0.3096630 | 2.1897550  |
| 9  | C | 5        | 1 | 2 | 3.5246085 | 88.2113605  | -80.8591939  | -2.3730320 | 0.8219120  | -0.4537200 |
| 10 | H | 9        | 5 | 1 | 1.0959496 | 69.8743231  | 152.5834567  | -1.6954430 | 1.6403080  | -0.1850070 |
| 11 | H | 9        | 5 | 1 | 1.0953489 | 55.4911004  | -75.6626782  | -2.0199260 | 0.3653870  | -1.3846820 |
| 12 | H | 9        | 5 | 1 | 1.0895795 | 159.5633537 | -118.3536312 | -3.3657520 | 1.2372770  | -0.6244900 |
| 13 | O | 9        | 5 | 1 | 1.4200027 | 91.9399045  | 39.9581946   | -2.4952420 | -0.1293630 | 0.5934420  |
| 14 | H | 13       | 9 | 5 | 0.9621777 | 107.4117479 | 5.0460338    | -1.6301020 | -0.5309900 | 0.7199900  |
| 15 | C | 4        | 3 | 2 | 1.4857215 | 133.8041875 | -179.5634065 | 1.5702500  | 1.8776050  | 0.1783750  |
| 16 | H | 15       | 4 | 3 | 1.0929817 | 111.0921536 | 117.7761618  | 2.5403070  | 2.0095010  | -0.3076310 |
| 17 | H | 15       | 4 | 3 | 1.0927851 | 111.1326212 | -122.0551713 | 0.8456830  | 2.5102750  | -0.3401910 |
| 18 | H | 15       | 4 | 3 | 1.0900375 | 109.6075709 | -2.1216443   | 1.6512550  | 2.2186520  | 1.2105120  |

S1.2.9 2-methylfuran  $\pi$ -bonded conformation of high energy PIb

up to table of contents

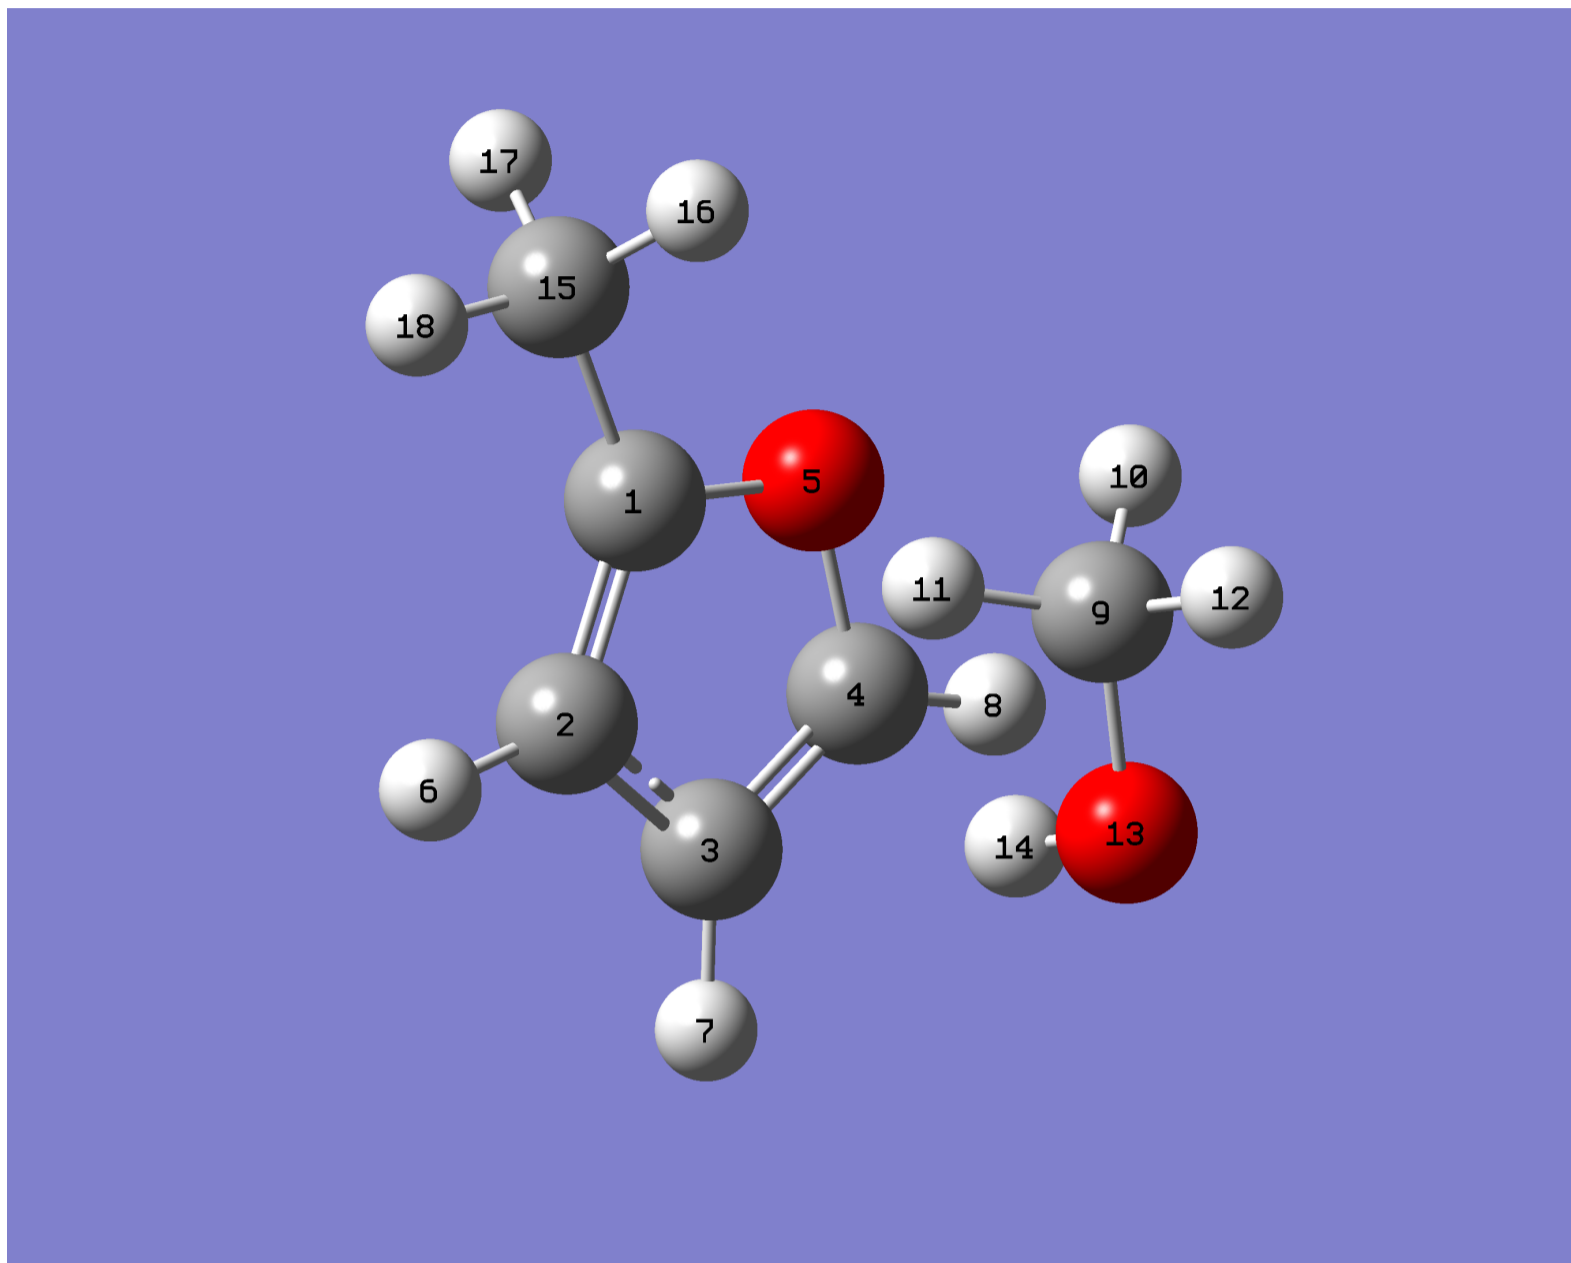

Figure S17:  $\pi$ -bonded methanol – 2-methylfuran structure in high-energy conformation.

Table S17:  $\pi$ -bonded methanol – 2-methylfuran structure, high-energy conformation.

| #  | N | ref atom |   |   |           | Bond        | Angle        | Dihedral   | X          | Y          | Z |
|----|---|----------|---|---|-----------|-------------|--------------|------------|------------|------------|---|
|    |   | A        | B | C |           |             |              |            |            |            |   |
| 1  | C |          |   |   |           |             |              | -1.1684050 | 0.4365480  | 0.1175140  |   |
| 2  | C | 1        |   |   | 1.3642477 |             |              | -0.9747610 | -0.4572280 | 1.1298570  |   |
| 3  | C | 2        | 1 |   | 1.4374330 | 106.7018956 |              | -0.5444560 | -1.6855790 | 0.5197710  |   |
| 4  | C | 3        | 2 | 1 | 1.3619236 | 106.0744256 | 0.1039445    | -0.5056980 | -1.4475480 | -0.8206300 |   |
| 5  | O | 4        | 3 | 2 | 1.3659647 | 110.1771542 | 0.0288272    | -0.8805940 | -0.1602190 | -1.0815830 |   |
| 6  | H | 2        | 1 | 5 | 1.0780611 | 125.9862463 | 179.8697893  | -1.1213290 | -0.2657490 | 2.1806040  |   |
| 7  | H | 3        | 2 | 1 | 1.0782644 | 127.6041685 | -179.2779120 | -0.3078840 | -2.6162500 | 1.0102190  |   |
| 8  | H | 4        | 3 | 2 | 1.0762508 | 133.8587833 | -179.9470552 | -0.2497610 | -2.0466430 | -1.6773080 |   |
| 9  | C | 1        | 2 | 3 | 3.5199455 | 91.1717794  | -79.3279000  | 2.2908720  | 1.0499550  | -0.0996280 |   |
| 10 | H | 9        | 1 | 2 | 1.0955701 | 64.9576056  | 149.2854322  | 1.7418970  | 1.1510440  | -1.0423270 |   |
| 11 | H | 9        | 1 | 2 | 1.0959090 | 61.9279601  | -80.0060589  | 1.7265670  | 1.5536860  | 0.6933610  |   |
| 12 | H | 9        | 1 | 2 | 1.0896594 | 162.9190106 | -139.5021915 | 3.2565870  | 1.5435160  | -0.2052200 |   |
| 13 | O | 9        | 1 | 2 | 1.4202944 | 90.0217350  | 34.9587178   | 2.5524210  | -0.3092940 | 0.2186020  |   |
| 14 | H | 13       | 9 | 1 | 0.9625402 | 107.8193579 | 3.3157171    | 1.7066060  | -0.7632160 | 0.2895630  |   |
| 15 | C | 1        | 2 | 3 | 1.4854832 | 133.8707342 | -179.6669352 | -1.5976890 | 1.8577540  | 0.0670260  |   |
| 16 | H | 15       | 1 | 2 | 1.0930555 | 111.0711875 | 119.5291136  | -0.8240040 | 2.4862750  | -0.3814640 |   |
| 17 | H | 15       | 1 | 2 | 1.0928205 | 111.1034225 | -120.3034492 | -2.5094220 | 1.9726170  | -0.5244180 |   |
| 18 | H | 15       | 1 | 2 | 1.0901012 | 109.6306032 | -0.3774839   | -1.7930570 | 2.2174220  | 1.0773680  |   |

S1.2.10 2-methylfuran  $\pi$ -bonded high TS PihITS

up to table of contents

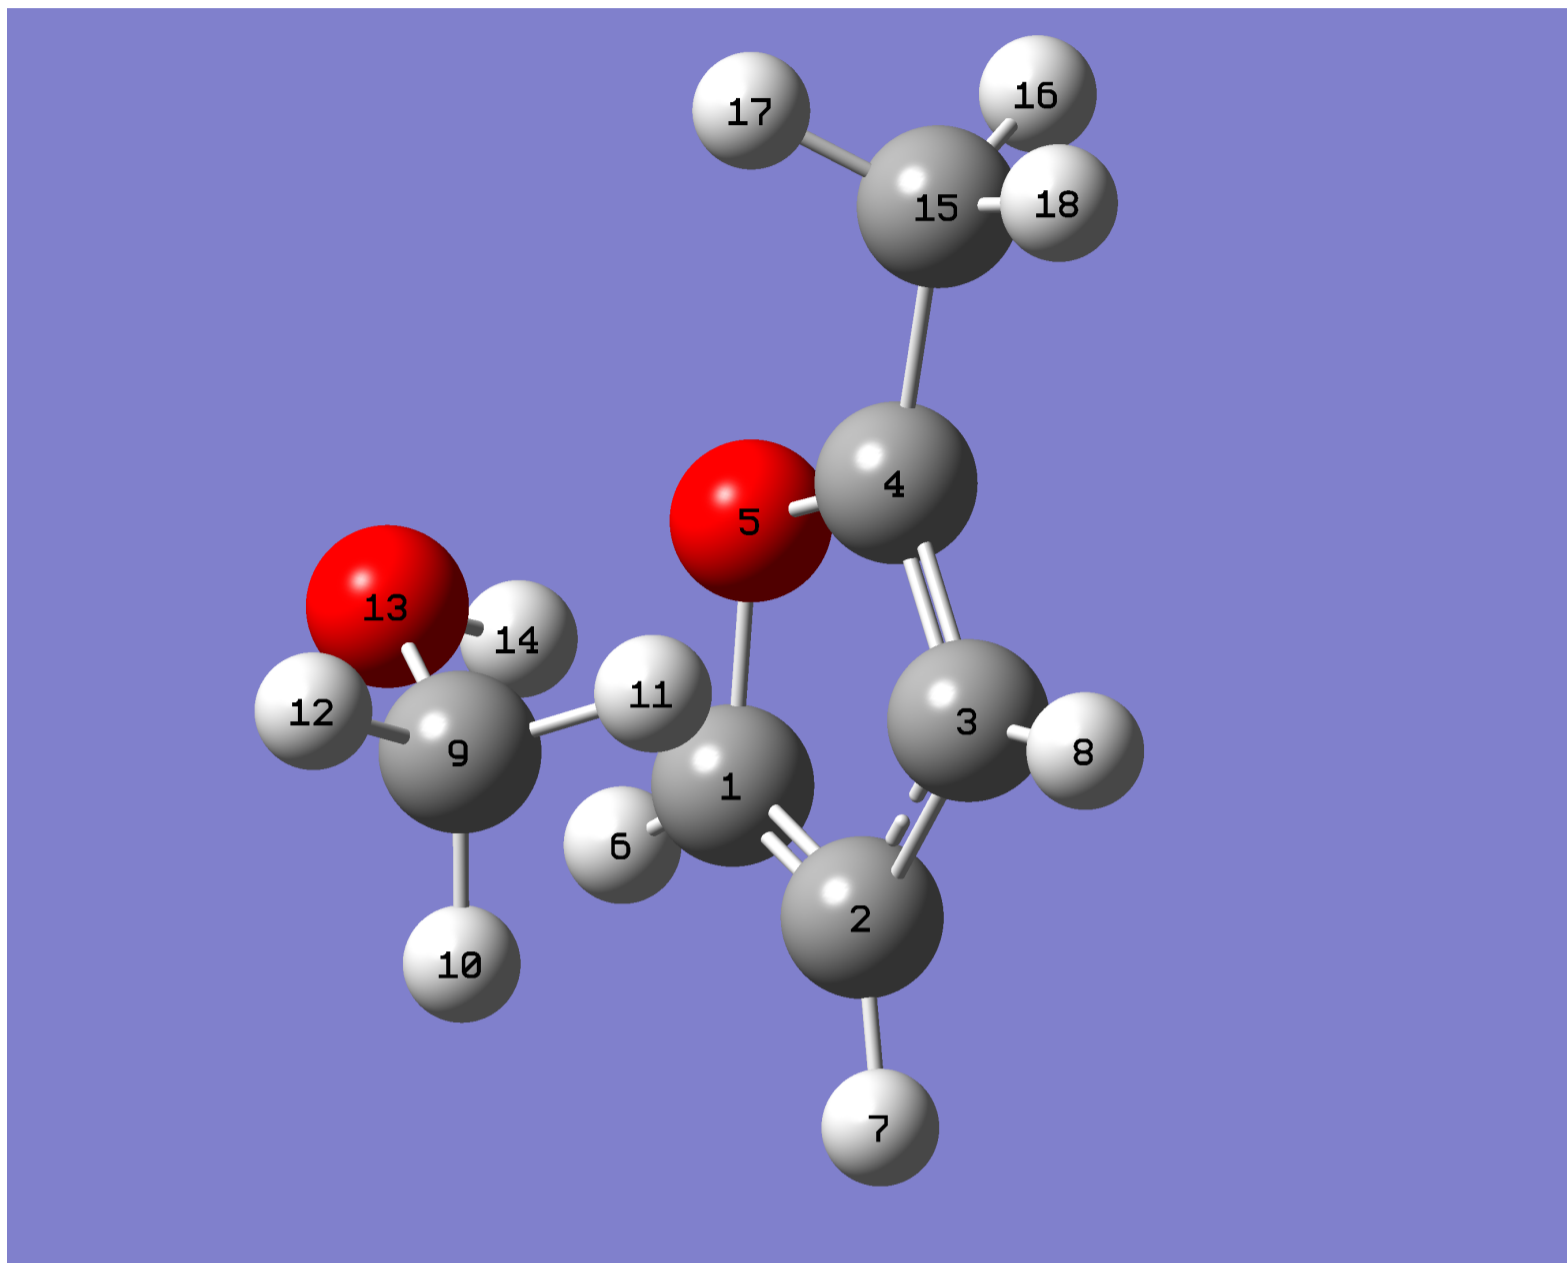

Figure S18:  $\pi$ -bonded methanol – 2-methylfuran transition state of highest energy.

Table S18:  $\pi$ -bonded methanol – 2-methylfuran transition state of highest energy.

| #  | N | ref atom |   |   | Bond      | Angle       | Dihedral     | X          | Y          | Z          |
|----|---|----------|---|---|-----------|-------------|--------------|------------|------------|------------|
|    |   | A        | B | C |           |             |              |            |            |            |
| 1  | C |          |   |   |           |             | 1.4819020    | -1.3347940 | -0.5904200 |            |
| 2  | C | 1        |   |   | 1.3602065 |             | 0.8773970    | -1.5607790 | 0.6069380  |            |
| 3  | C | 2        | 1 |   | 1.4376219 | 106.0180655 | 0.5533160    | -0.2649670 | 1.1385390  |            |
| 4  | C | 3        | 2 | 1 | 1.3663549 | 106.7479863 | -0.0018359   | 0.9848860  | 0.6546570  | 0.2247750  |
| 5  | O | 1        | 2 | 3 | 1.3665041 | 110.2609799 | -0.0681769   | 1.5537520  | 0.0070880  | -0.8384600 |
| 6  | H | 1        | 2 | 3 | 1.0760621 | 133.8780997 | -179.6860720 | 1.8925440  | -1.9753860 | -1.3512910 |
| 7  | H | 2        | 1 | 5 | 1.0778812 | 126.3724137 | -179.8940866 | 0.6884780  | -2.5221530 | 1.0562680  |
| 8  | H | 3        | 2 | 1 | 1.0784392 | 127.4277597 | -179.3701463 | 0.0734000  | -0.0434740 | 2.0785670  |
| 9  | C | 3        | 2 | 1 | 3.7373187 | 98.4640771  | 99.9519140   | -3.0630720 | -0.1740590 | 0.1999100  |
| 10 | H | 9        | 3 | 2 | 1.0958190 | 84.9071428  | 37.8965419   | -3.0562040 | -1.2391220 | 0.4576170  |
| 11 | H | 9        | 3 | 2 | 1.0963057 | 67.6069306  | 150.6072605  | -2.8514330 | 0.4089480  | 1.1039000  |
| 12 | H | 9        | 3 | 2 | 1.0894976 | 166.4775975 | -133.9893650 | -4.0593230 | 0.0890980  | -0.1539790 |
| 13 | O | 9        | 3 | 2 | 1.4196327 | 64.7294269  | -79.3909316  | -2.1565470 | 0.1253700  | -0.8507620 |
| 14 | H | 13       | 9 | 3 | 0.9625112 | 107.2906970 | 10.1588257   | -1.2723220 | -0.0858090 | -0.5345700 |
| 15 | C | 4        | 3 | 2 | 1.4856483 | 133.8103311 | 178.9706351  | 0.9383730  | 2.1380680  | 0.1578490  |
| 16 | H | 15       | 4 | 3 | 1.0926855 | 111.0430079 | 122.2544245  | 1.9424650  | 2.5581420  | 0.0614190  |
| 17 | H | 15       | 4 | 3 | 1.0927549 | 110.8789406 | -117.3621250 | 0.3447020  | 2.4709220  | -0.6970640 |
| 18 | H | 15       | 4 | 3 | 1.0900969 | 109.5648058 | 2.2948826    | 0.4832300  | 2.5304250  | 1.0673610  |

### S1.3 Methanol – 2,5-dimethylfuran system

#### S1.3.1 2,5-dimethylfuran OH top Ot

up to table of contents

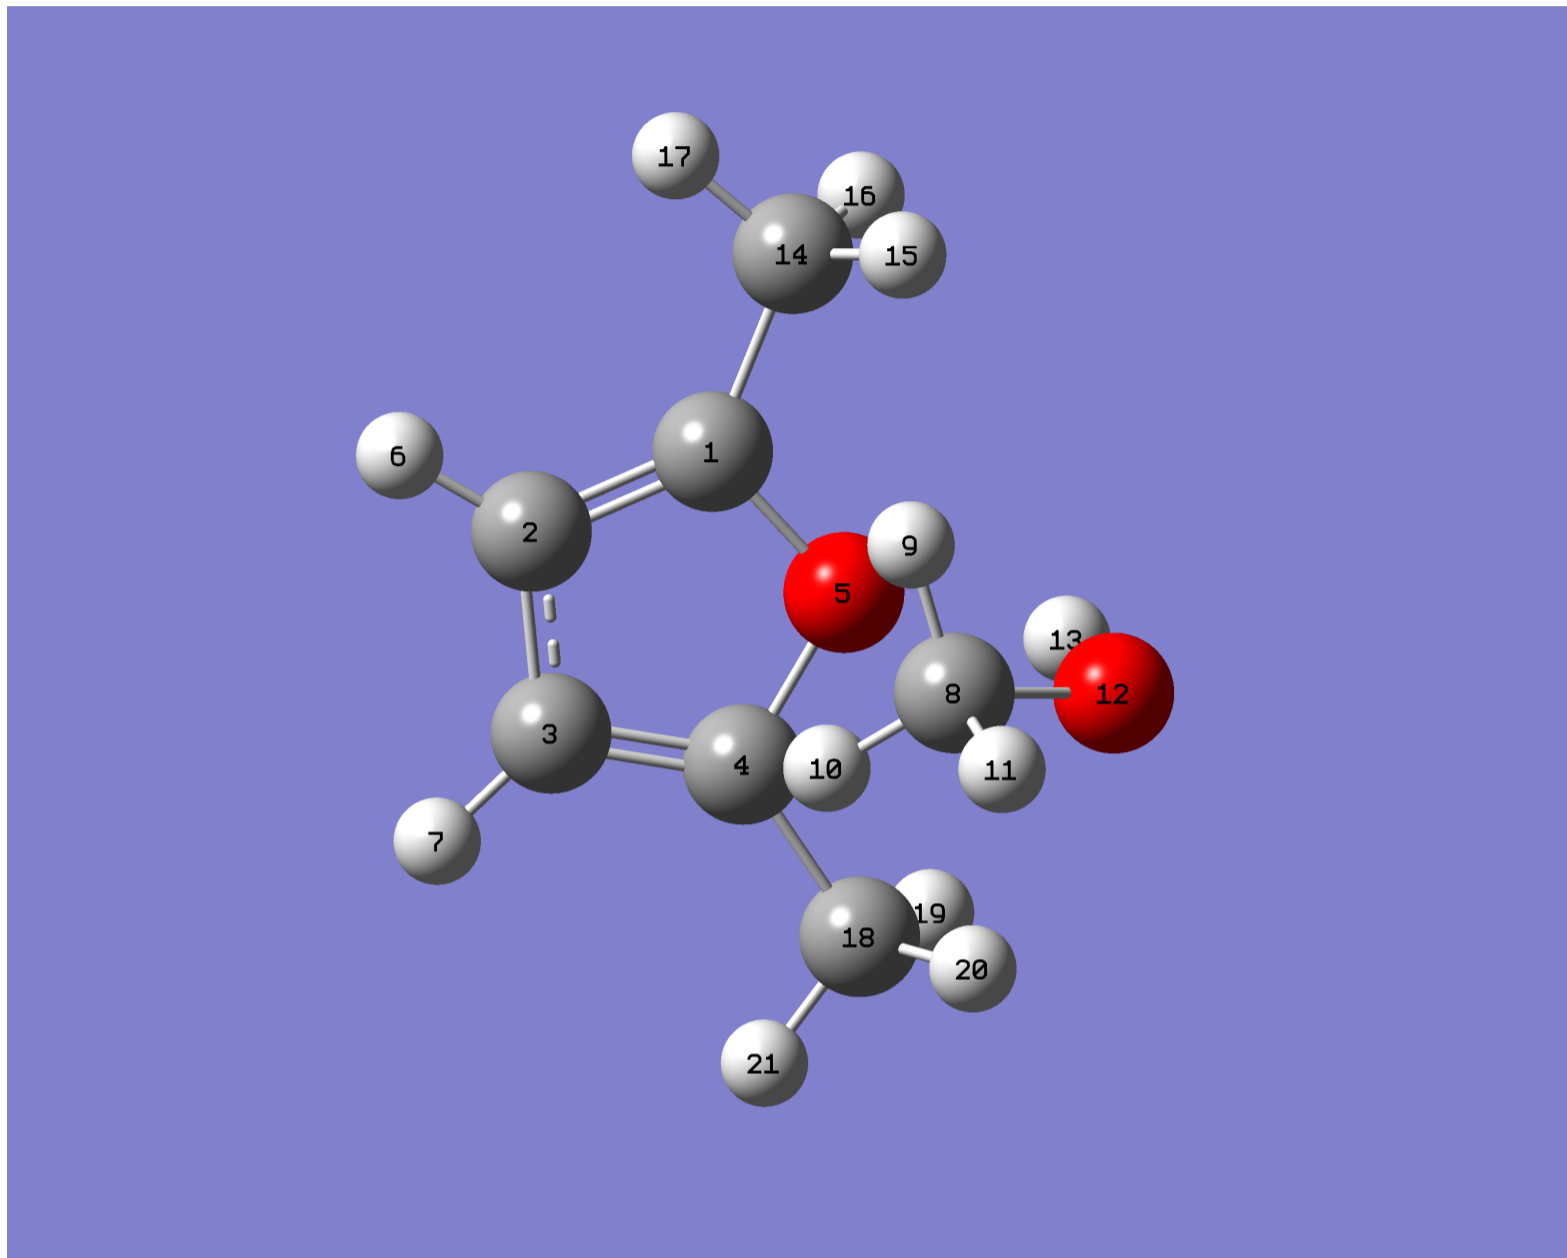

Figure S19: OH-bonded methanol – 2,5-dimethylfuran structure in top conformation Ot.

Table S19: OH-bonded methanol – 2,5-dimethylfuran top conformation Ot

| #  | ref atom |    |   |   | Bond      | Angle       | Dihedral     | X          | Y          | Z          |
|----|----------|----|---|---|-----------|-------------|--------------|------------|------------|------------|
|    | N        | A  | B | C |           |             |              |            |            |            |
| 1  | C        |    |   |   |           |             | -1.1060320   | 0.8807050  | -0.1443340 |            |
| 2  | C        | 1  |   |   | 1.3606396 |             | -1.7797440   | 0.2992760  | 0.8849340  |            |
| 3  | C        | 2  | 1 |   | 1.4383124 | 106.8589974 | -1.4001020   | -1.0879330 | 0.9012340  |            |
| 4  | C        | 3  | 2 | 1 | 1.3608960 | 106.9146967 | -0.0103810   | -0.5179840 | -1.2690460 | -0.1191110 |
| 5  | O        | 1  | 2 | 3 | 1.3777171 | 109.1845517 | 0.0803895    | -0.3291250 | -0.0690550 | -0.7708130 |
| 6  | H        | 2  | 1 | 5 | 1.0783536 | 125.7759046 | -179.8413457 | -2.4653680 | 0.7980210  | 1.5512820  |
| 7  | H        | 3  | 2 | 1 | 1.0783591 | 127.3534767 | -179.9129006 | -1.7404540 | -1.8514500 | 1.5824540  |
| 8  | C        | 5  | 1 | 2 | 3.2434251 | 92.1830933  | -93.9863703  | 2.2648730  | 0.6912930  | 1.0216300  |
| 9  | H        | 8  | 5 | 1 | 1.0961751 | 89.1422284  | -25.6445076  | 1.8545230  | 1.6985020  | 1.1585340  |
| 10 | H        | 8  | 5 | 1 | 1.0954770 | 63.7772661  | 85.5886399   | 1.5683590  | -0.0315260 | 1.4603450  |
| 11 | H        | 8  | 5 | 1 | 1.0896237 | 162.4522977 | 153.8086921  | 3.2133260  | 0.6308510  | 1.5546060  |
| 12 | O        | 8  | 5 | 1 | 1.4218537 | 64.7881754  | -140.5515004 | 2.5351940  | 0.4075170  | -0.3451420 |
| 13 | H        | 12 | 8 | 5 | 0.9627219 | 107.0458543 | 10.1108665   | 1.6861850  | 0.3576190  | -0.7962820 |
| 14 | C        | 1  | 2 | 3 | 1.4856127 | 134.3661679 | -179.9342226 | -1.0430260 | 2.2576460  | -0.6985080 |
| 15 | H        | 14 | 1 | 2 | 1.0937604 | 111.3658938 | 120.0634945  | -0.0258460 | 2.6575990  | -0.6573460 |
| 16 | H        | 14 | 1 | 2 | 1.0931568 | 111.2264307 | -119.5934785 | -1.3700130 | 2.2799060  | -1.7413770 |
| 17 | H        | 14 | 1 | 2 | 1.0902243 | 109.5234253 | 0.2600477    | -1.6931030 | 2.9136580  | -0.1191660 |
| 18 | C        | 4  | 3 | 2 | 1.4857789 | 134.4461718 | 179.4536493  | 0.2475990  | -2.4316430 | -0.6385240 |
| 19 | H        | 18 | 4 | 3 | 1.0932694 | 111.1678085 | 119.4680209  | -0.0186700 | -2.6477150 | -1.6766240 |
| 20 | H        | 18 | 4 | 3 | 1.0932559 | 111.0254741 | -120.2319847 | 1.3236230  | -2.2427310 | -0.5973760 |
| 21 | H        | 18 | 4 | 3 | 1.0902501 | 109.4853772 | -0.3038127   | 0.0253880  | -3.3122250 | -0.0353300 |

### S1.3.2 2,5-dimethylfuran OH planar Op

up to table of contents

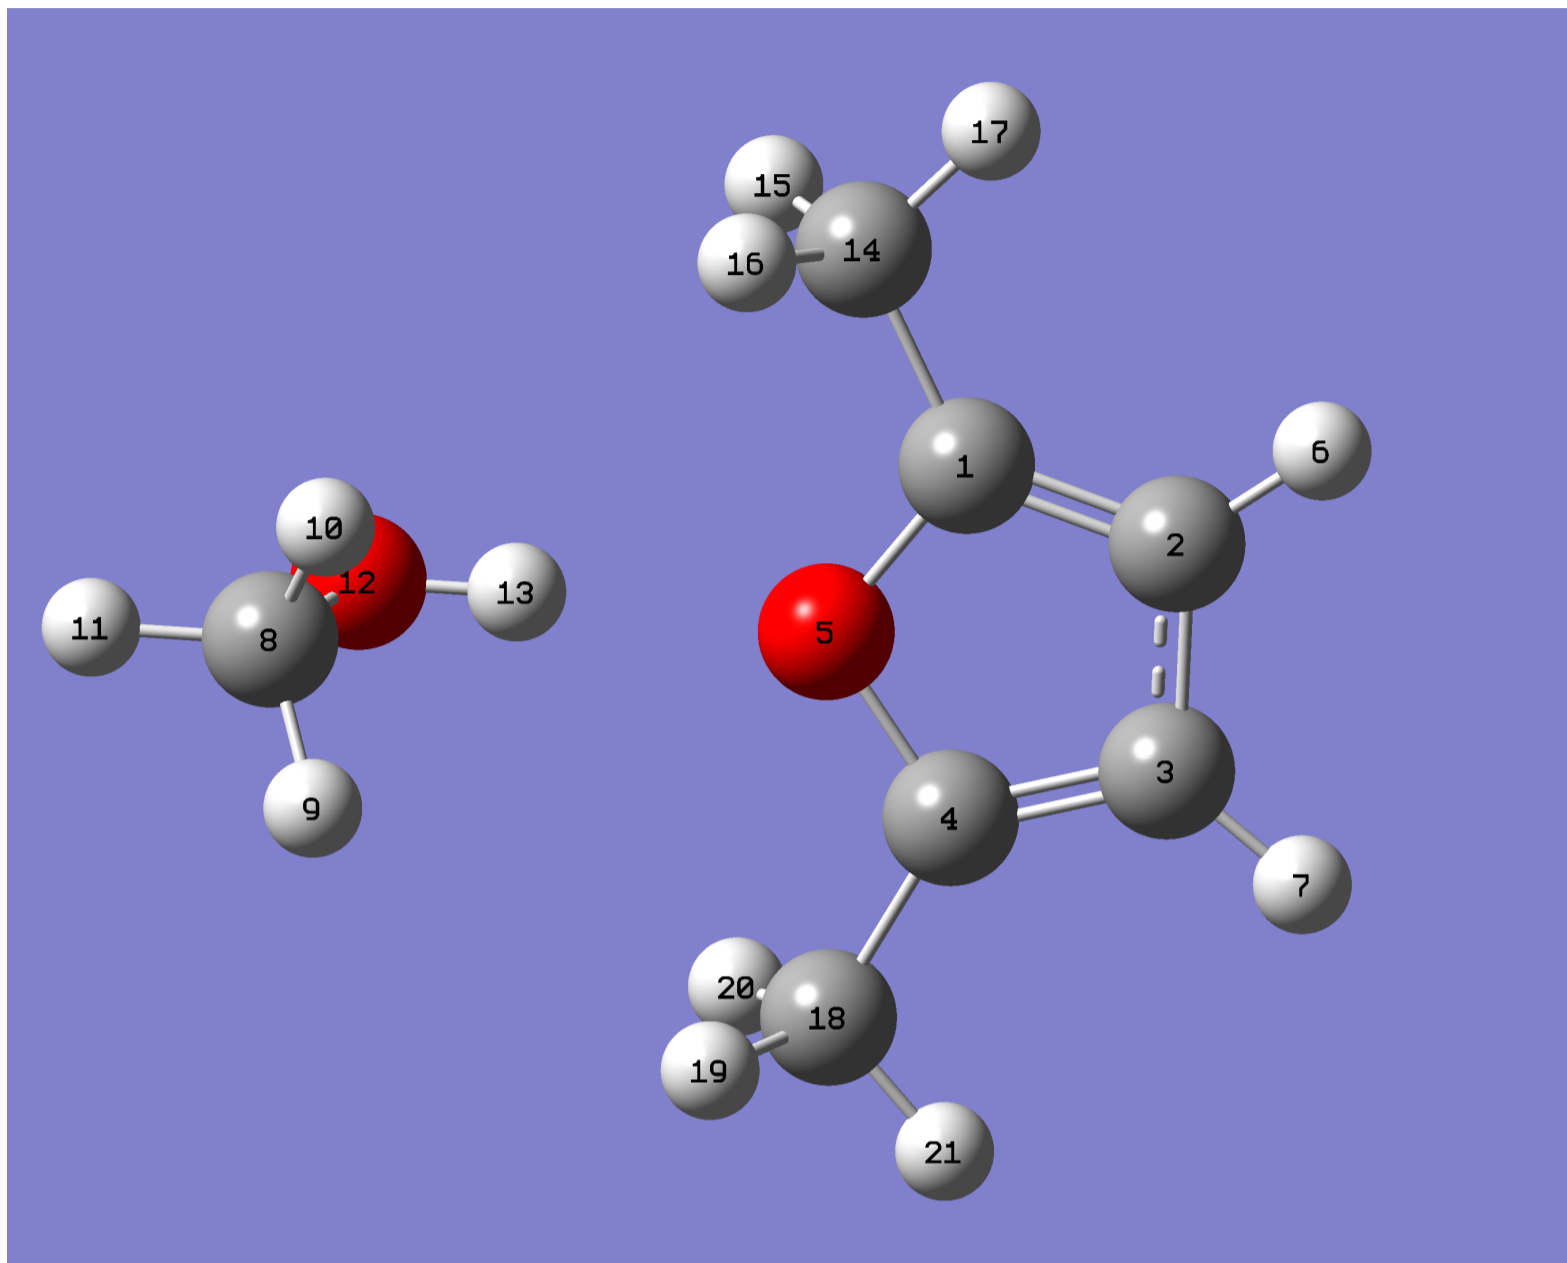

Figure S20: OH-bonded methanol – 2,5-dimethylfuran structure in planar conformation Op.

Table S20: OH-bonded methanol – 2,5-dimethylfuran planar conformation Op

| #  | N | ref atom |   |   | Bond      | Angle       | Dihedral     | X          | Y          | Z          |
|----|---|----------|---|---|-----------|-------------|--------------|------------|------------|------------|
|    |   | A        | B | C |           |             |              |            |            |            |
| 1  | C |          |   |   |           |             | 0.9984110    | 1.1153250  | -0.0038870 |            |
| 2  | C | 1        |   |   | 1.3603022 |             | 2.2929990    | 0.7193940  | 0.1291640  |            |
| 3  | C | 2        | 1 |   | 1.4387920 | 106.9214119 | 2.2929970    | -0.7193980 | 0.1291640  |            |
| 4  | C | 3        | 2 | 1 | 1.3603023 | 106.9214372 | 0.0000000    | 0.9984080  | -1.1153260 | -0.0038870 |
| 5  | O | 4        | 3 | 2 | 1.3777897 | 109.0311424 | -0.0368402   | 0.1936410  | 0.0000000  | -0.0857550 |
| 6  | H | 2        | 1 | 5 | 1.0782661 | 125.7497556 | -179.9949281 | 3.1459600  | 1.3732410  | 0.2163390  |
| 7  | H | 3        | 2 | 1 | 1.0782664 | 127.3288563 | 179.9675782  | 3.1459560  | -1.3732480 | 0.2163390  |
| 8  | C | 5        | 4 | 3 | 3.4367874 | 124.0643833 | -158.7293086 | -3.1725650 | 0.0000010  | 0.6071840  |
| 9  | H | 8        | 5 | 4 | 1.0964714 | 80.3412822  | 22.3071638   | -2.8687120 | -0.8900590 | 1.1708470  |
| 10 | H | 8        | 5 | 4 | 1.0964710 | 80.3412763  | 133.1646154  | -2.8687110 | 0.8900590  | 1.1708490  |
| 11 | H | 8        | 5 | 4 | 1.0897773 | 164.0914697 | -102.2641681 | -4.2593080 | 0.0000020  | 0.5259180  |
| 12 | O | 8        | 5 | 4 | 1.4184540 | 56.8278094  | -102.2641422 | -2.6517730 | 0.0000030  | -0.7122050 |
| 13 | H | 12       | 8 | 5 | 0.9638004 | 107.2280552 | 0.0000000    | -1.6907010 | 0.0000020  | -0.6397360 |
| 14 | C | 1        | 2 | 3 | 1.4857159 | 134.5255233 | 179.9528253  | 0.3135100  | 2.4319230  | -0.0734010 |
| 15 | H | 14       | 1 | 2 | 1.0930601 | 111.2927416 | 121.2130830  | -0.2454340 | 2.5398020  | -1.0065270 |
| 16 | H | 14       | 1 | 2 | 1.0934732 | 111.2685088 | -118.5039617 | -0.3897490 | 2.5573890  | 0.7544690  |
| 17 | H | 14       | 1 | 2 | 1.0901695 | 109.4995425 | 1.2572694    | 1.0536830  | 3.2304680  | -0.0191860 |
| 18 | C | 4        | 3 | 2 | 1.4857164 | 134.5255101 | -179.9528287 | 0.3135040  | -2.4319230 | -0.0734010 |
| 19 | H | 18       | 4 | 3 | 1.0934722 | 111.2684996 | 118.5039944  | -0.3897550 | -2.5573870 | 0.7544680  |
| 20 | H | 18       | 4 | 3 | 1.0930603 | 111.2926655 | -121.2131585 | -0.2454410 | -2.5397990 | -1.0065270 |
| 21 | H | 18       | 4 | 3 | 1.0901688 | 109.4995384 | -1.2573240   | 1.0536750  | -3.2304690 | -0.0191870 |

### S1.3.3 2,5-dimethylfuran OH high-energy TS OhiTS

up to table of contents

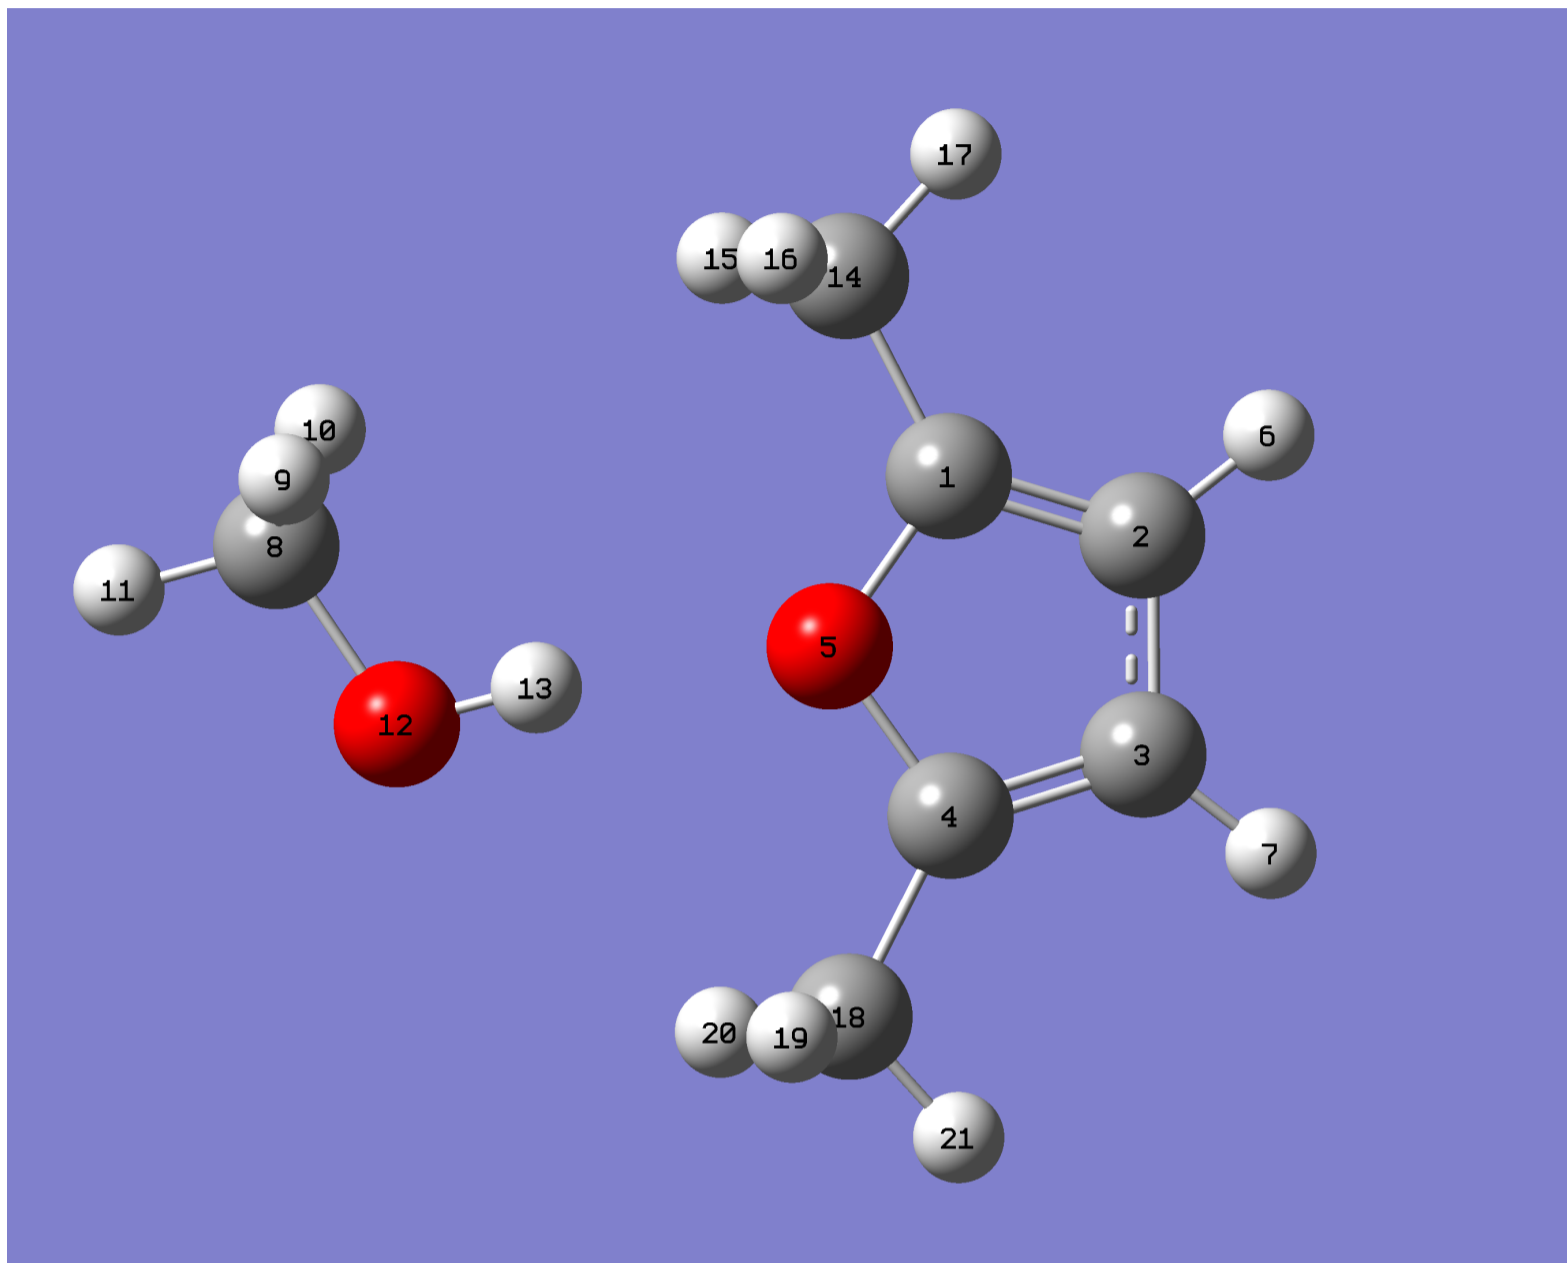

Figure S21: OH-bonded methanol – 2,5-dimethylfuran transition state in-plane structure with high energy.

Table S21: OH-bonded methanol – 2,5-dimethylfuran high-energy transition state

| #  | N | ref atom |   |   | Bond      | Angle       | Dihedral     | X          | Y          | Z          |
|----|---|----------|---|---|-----------|-------------|--------------|------------|------------|------------|
|    |   | A        | B | C |           |             |              |            |            |            |
| 1  | C |          |   |   |           |             | 0.9066580    | 1.1813690  | 0.0478900  |            |
| 2  | C | 1        |   |   | 1.3601749 |             | 2.2092770    | 0.9268800  | -0.2495910 |            |
| 3  | C | 2        | 1 |   | 1.4386517 | 106.8966344 | 2.3665620    | -0.5031480 | -0.2493640 |            |
| 4  | C | 3        | 2 | 1 | 1.3603463 | 106.9529127 | -0.0882360   | 1.1512040  | -1.0358240 | 0.0501410  |
| 5  | O | 1        | 2 | 3 | 1.3774302 | 109.0916879 | 0.1745968    | 0.2461610  | -0.0124920 | 0.2369760  |
| 6  | H | 2        | 1 | 5 | 1.0783279 | 125.7564509 | -179.8922197 | 2.9670700  | 1.6682970  | -0.4466740 |
| 7  | H | 3        | 2 | 1 | 1.0782298 | 127.3274681 | 179.9664388  | 3.2676090  | -1.0618240 | -0.4457690 |
| 8  | C | 5        | 1 | 2 | 3.7066919 | 113.5299070 | -160.0794490 | -3.4349240 | 0.2634470  | -0.0992320 |
| 9  | H | 8        | 5 | 1 | 1.0964212 | 86.7159765  | -77.2409102  | -3.4302930 | 0.7045250  | 0.9045450  |
| 10 | H | 8        | 5 | 1 | 1.0967694 | 85.8291039  | 31.8008137   | -3.2285000 | 1.0534280  | -0.8315040 |
| 11 | H | 8        | 5 | 1 | 1.0896891 | 153.8671450 | 156.0539092  | -4.4316600 | -0.1308180 | -0.2954330 |
| 12 | O | 8        | 5 | 1 | 1.4179635 | 46.6013252  | 157.8190384  | -2.5248090 | -0.8181710 | -0.2106490 |
| 13 | H | 12       | 8 | 5 | 0.9639189 | 108.0005418 | 1.6838615    | -1.6401200 | -0.4833610 | -0.0252650 |
| 14 | C | 1        | 2 | 3 | 1.4856952 | 134.3991945 | -179.9031802 | 0.0982730  | 2.4182240  | 0.2027890  |
| 15 | H | 14       | 1 | 2 | 1.0936520 | 111.3324548 | 119.2606004  | -0.7225350 | 2.4500740  | -0.5192460 |
| 16 | H | 14       | 1 | 2 | 1.0933965 | 111.3038860 | -120.2149712 | -0.3315770 | 2.4888540  | 1.2056630  |
| 17 | H | 14       | 1 | 2 | 1.0901935 | 109.5220169 | -0.4203311   | 0.7315370  | 3.2902930  | 0.0384900  |
| 18 | C | 4        | 3 | 2 | 1.4859055 | 134.5494915 | 179.9257667  | 0.6290100  | -2.4180300 | 0.2074150  |
| 19 | H | 18       | 4 | 3 | 1.0932208 | 111.2396550 | 117.6239675  | 0.2679180  | -2.5916270 | 1.2245720  |
| 20 | H | 18       | 4 | 3 | 1.0929048 | 111.2386537 | -122.3135744 | -0.2017540 | -2.6076480 | -0.4769220 |
| 21 | H | 18       | 4 | 3 | 1.0901928 | 109.4166600 | -2.2205744   | 1.4251170  | -3.1323890 | -0.0033580 |

### S1.3.4 2,5-dimethylfuran OH low-energy TS OloTS

up to table of contents

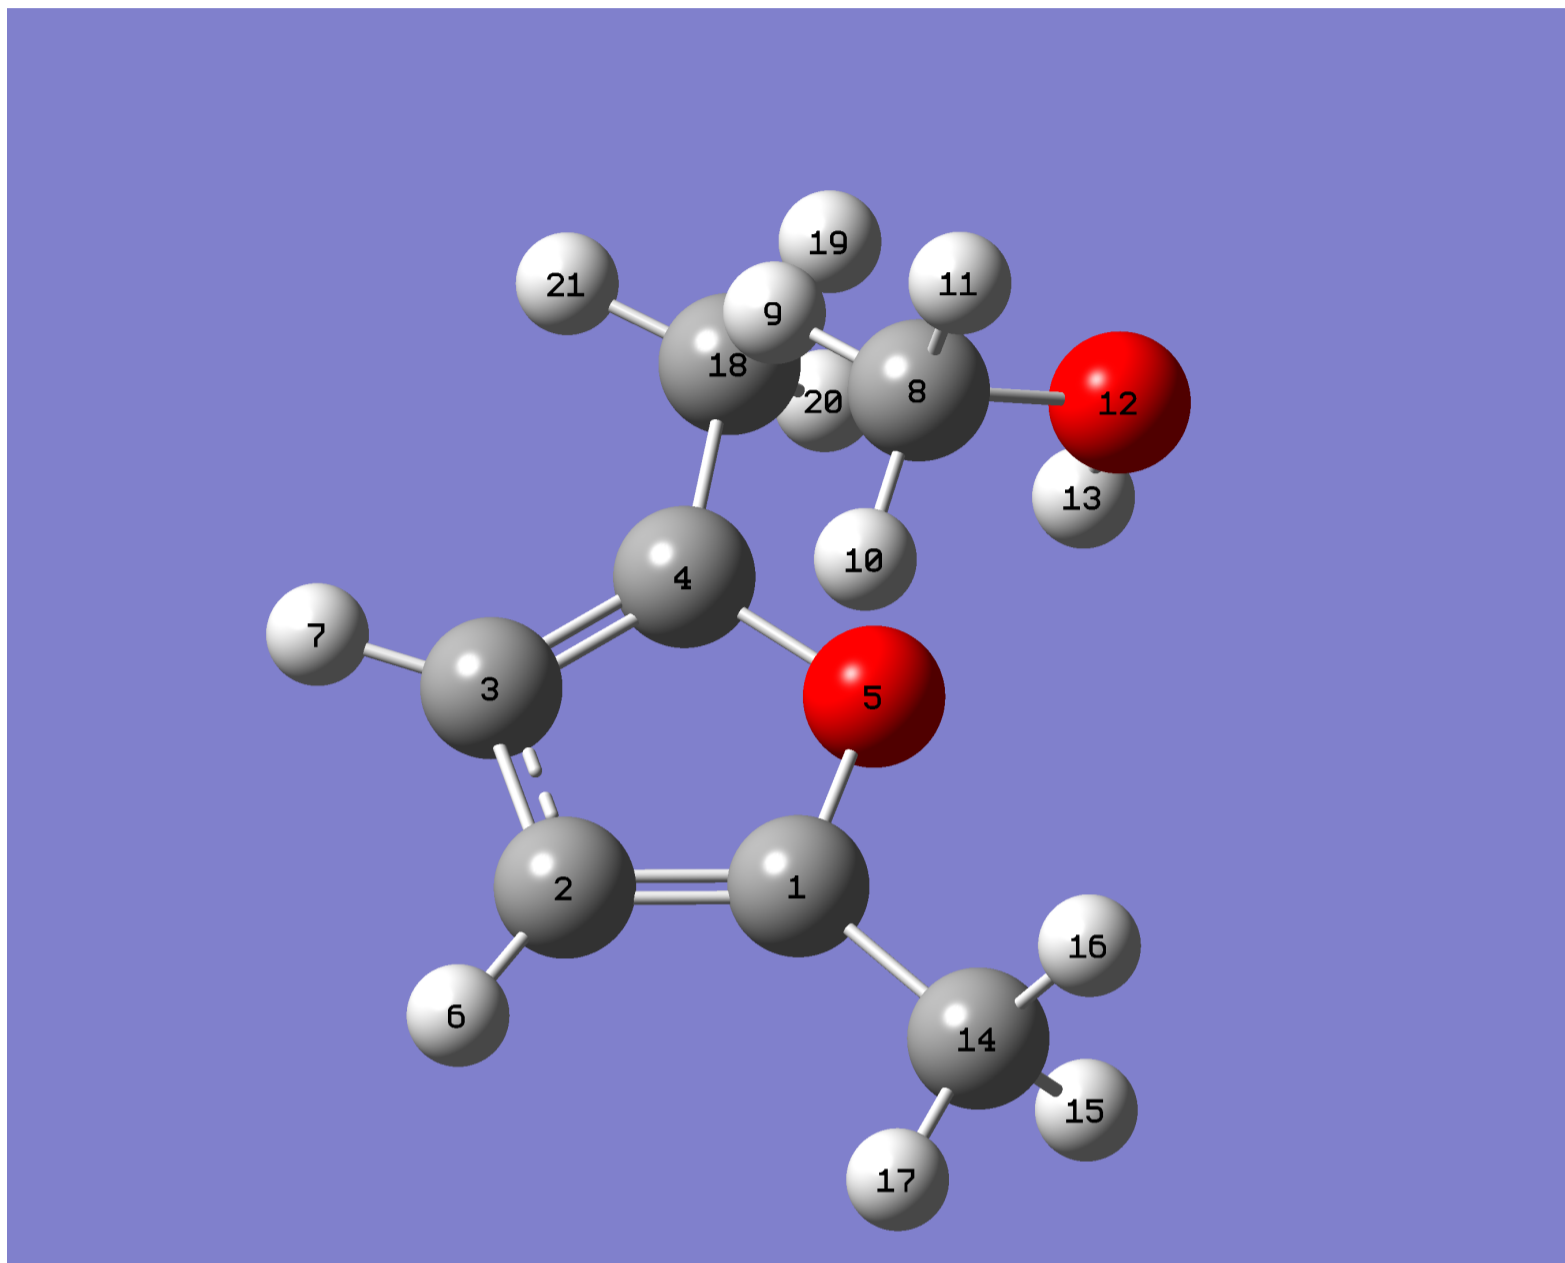

Figure S22: OH-bonded methanol – 2,5-dimethylfuran transition state in-plane structure with low energy.

Table S22: OH-bonded methanol – 2,5-dimethylfuran low-energy transition state

| #  | N | ref atom |   |   | Bond      | Angle       | Dihedral     | X          | Y          | Z          |
|----|---|----------|---|---|-----------|-------------|--------------|------------|------------|------------|
|    |   | A        | B | C |           |             |              |            |            |            |
| 1  | C |          |   |   |           |             | -0.8376710   | -1.1145970 | -0.1322450 |            |
| 2  | C | 1        |   |   | 1.3605869 |             | -1.6490410   | -0.7192530 | 0.8858800  |            |
| 3  | C | 2        | 1 |   | 1.4385100 | 106.8919583 | -1.6490390   | 0.7192570  | 0.8858800  |            |
| 4  | C | 3        | 2 | 1 | 1.3605863 | 106.8919770 | 0.0000000    | -0.8376690 | 1.1145990  | -0.1322450 |
| 5  | O | 1        | 2 | 3 | 1.3783076 | 109.1416378 | -0.0848133   | -0.3338620 | 0.0000000  | -0.7675260 |
| 6  | H | 2        | 1 | 5 | 1.0783558 | 125.7622200 | 179.8797120  | -2.1837470 | -1.3734090 | 1.5559700  |
| 7  | H | 3        | 2 | 1 | 1.0783559 | 127.3457739 | 179.9637480  | -2.1837440 | 1.3734140  | 1.5559700  |
| 8  | C | 5        | 1 | 2 | 3.2518504 | 92.7271998  | 93.8924838   | 2.3691100  | -0.0000030 | 1.0403660  |
| 9  | H | 8        | 5 | 1 | 1.0958503 | 75.9768775  | -110.7711071 | 1.8240030  | 0.8887780  | 1.3777300  |
| 10 | H | 8        | 5 | 1 | 1.0958503 | 75.9769807  | 2.6598804    | 1.8240040  | -0.8887850 | 1.3777290  |
| 11 | H | 8        | 5 | 1 | 1.0895903 | 171.4904811 | 125.9446867  | 3.3544560  | -0.0000030 | 1.5054470  |
| 12 | O | 8        | 5 | 1 | 1.4213267 | 64.4549958  | 125.9443528  | 2.5726110  | -0.0000020 | -0.3663170 |
| 13 | H | 12       | 8 | 5 | 0.9628907 | 107.1310972 | 0.0000000    | 1.7025300  | -0.0000020 | -0.7787700 |
| 14 | C | 1        | 2 | 3 | 1.4856966 | 134.4632259 | 179.6853617  | -0.4045490 | -2.4315570 | -0.6663950 |
| 15 | H | 14       | 1 | 2 | 1.0931951 | 111.2059268 | 119.0957239  | -0.7142990 | -2.5573760 | -1.7072120 |
| 16 | H | 14       | 1 | 2 | 1.0935996 | 111.2256789 | -120.6431754 | 0.6831140  | -2.5374270 | -0.6246720 |
| 17 | H | 14       | 1 | 2 | 1.0902181 | 109.5229579 | -0.7476609   | -0.8523620 | -3.2299880 | -0.0743250 |
| 18 | C | 4        | 3 | 2 | 1.4856969 | 134.4632479 | -179.6853228 | -0.4045430 | 2.4315580  | -0.6663950 |
| 19 | H | 18       | 4 | 3 | 1.0935983 | 111.2256956 | 120.6431095  | 0.6831190  | 2.5374250  | -0.6246720 |
| 20 | H | 18       | 4 | 3 | 1.0931952 | 111.2059185 | -119.0957615 | -0.7142930 | 2.5573780  | -1.7072120 |
| 21 | H | 18       | 4 | 3 | 1.0902184 | 109.5229166 | 0.7475429    | -0.8523550 | 3.2299900  | -0.0743250 |



### S1.3.5 2,5-dimethylfuran TS for OH- $\pi$ conversion

up to table of contents

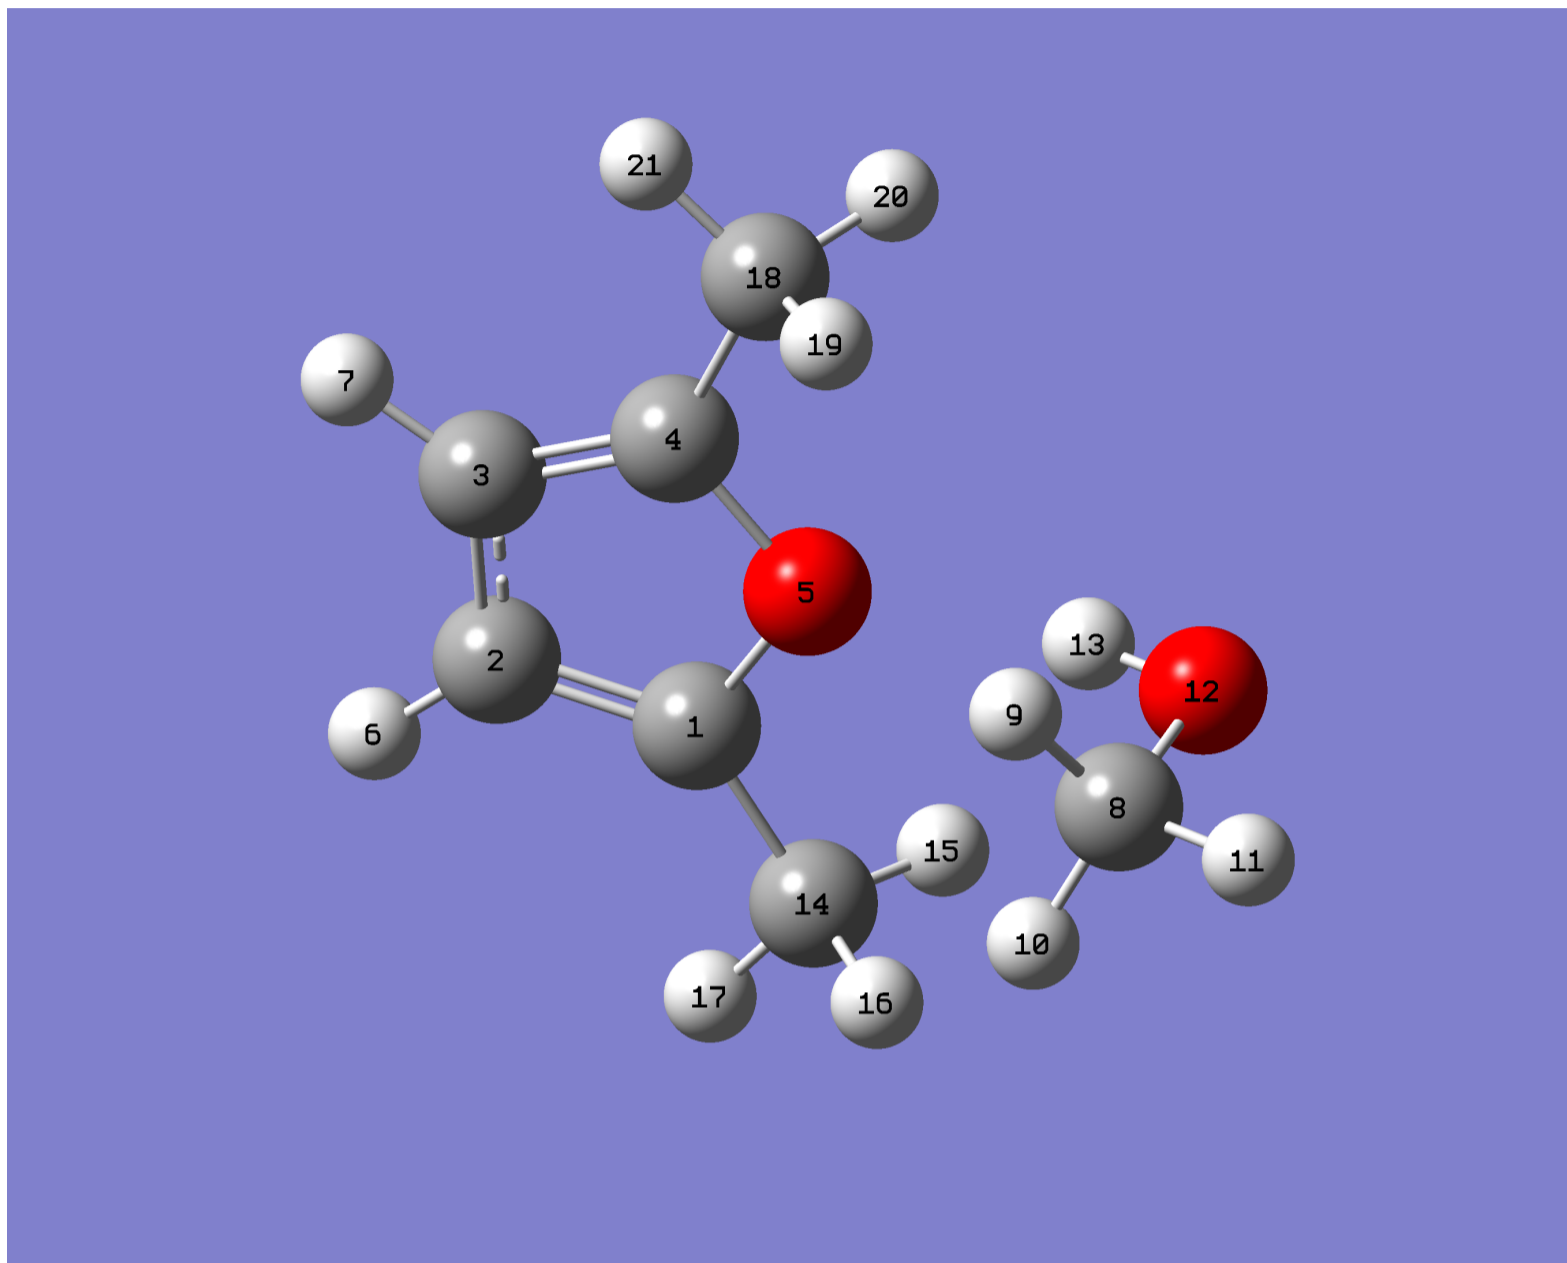

Figure S23: Methanol – 2,5-dimethylfuran transition state connecting OH- and  $\pi$ -bonded structure.

Table S23: Methanol – 2,5-dimethylfuran transition state connecting OH- and  $\pi$ -bonded structure.

| #  | N | ref atom |   |   | Bond      | Angle       | Dihedral     | X          | Y          | Z          |
|----|---|----------|---|---|-----------|-------------|--------------|------------|------------|------------|
|    |   | A        | B | C |           |             |              |            |            |            |
| 1  | C |          |   |   |           |             | -0.9661770   | -1.1151340 | -0.0596060 |            |
| 2  | C | 1        |   |   | 1.3604298 |             | -2.1886840   | -0.7193430 | 0.3871550  |            |
| 3  | C | 2        | 1 |   | 1.4386870 | 106.9136928 | -2.1886840   | 0.7193440  | 0.3871550  |            |
| 4  | C | 3        | 2 | 1 | 1.3604295 | 106.9136525 | 0.0000000    | -0.9661770 | 1.1151340  | -0.0596060 |
| 5  | O | 4        | 3 | 2 | 1.3776052 | 109.0418758 | 0.0341848    | -0.2067150 | 0.0000000  | -0.3379760 |
| 6  | H | 2        | 1 | 5 | 1.0782723 | 125.7518232 | 179.8947637  | -2.9943130 | -1.3732790 | 0.6804140  |
| 7  | H | 3        | 2 | 1 | 1.0782723 | 127.3344410 | 179.9274788  | -2.9943130 | 1.3732800  | 0.6804140  |
| 8  | C | 5        | 4 | 3 | 3.3748597 | 116.6920067 | -133.9347074 | 2.9654120  | 0.0000000  | 0.8141040  |
| 9  | H | 8        | 5 | 4 | 1.0965790 | 79.0321232  | 9.2358922    | 2.5623500  | 0.8896070  | 1.3127280  |
| 10 | H | 8        | 5 | 4 | 1.0965798 | 79.0321314  | 120.6872789  | 2.5623500  | -0.8896080 | 1.3127280  |
| 11 | H | 8        | 5 | 4 | 1.0897370 | 166.4252332 | -115.0384294 | 4.0483880  | 0.0000000  | 0.9353050  |
| 12 | O | 8        | 5 | 4 | 1.4181498 | 59.1741067  | -115.0384294 | 2.6980860  | 0.0000000  | -0.5786220 |
| 13 | H | 12       | 8 | 5 | 0.9637004 | 107.2008666 | 0.0000000    | 1.7402710  | 0.0000000  | -0.6849650 |
| 14 | C | 1        | 2 | 3 | 1.4857191 | 134.4911240 | -179.8964391 | -0.3208120 | -2.4320530 | -0.2974920 |
| 15 | H | 14       | 1 | 2 | 1.0930530 | 111.2345835 | 120.5873744  | -0.0176190 | -2.5414380 | -1.3419410 |
| 16 | H | 14       | 1 | 2 | 1.0933514 | 111.3771284 | -119.1871332 | 0.5705320  | -2.5569880 | 0.3232450  |
| 17 | H | 14       | 1 | 2 | 1.0901729 | 109.4945900 | 0.6861274    | -1.0229600 | -3.2302320 | -0.0558820 |
| 18 | C | 4        | 3 | 2 | 1.4857191 | 134.4910837 | 179.8964392  | -0.3208120 | 2.4320530  | -0.2974920 |
| 19 | H | 18       | 4 | 3 | 1.0933514 | 111.3771284 | 119.1871331  | 0.5705320  | 2.5569880  | 0.3232450  |
| 20 | H | 18       | 4 | 3 | 1.0930539 | 111.2345731 | -120.5873622 | -0.0176190 | 2.5414380  | -1.3419420 |
| 21 | H | 18       | 4 | 3 | 1.0901722 | 109.4946262 | -0.6861089   | -1.0229590 | 3.2302320  | -0.0558820 |

### S1.3.6 2,5-dimethylfuran $\pi$ -bonded conformation PI

up to table of contents

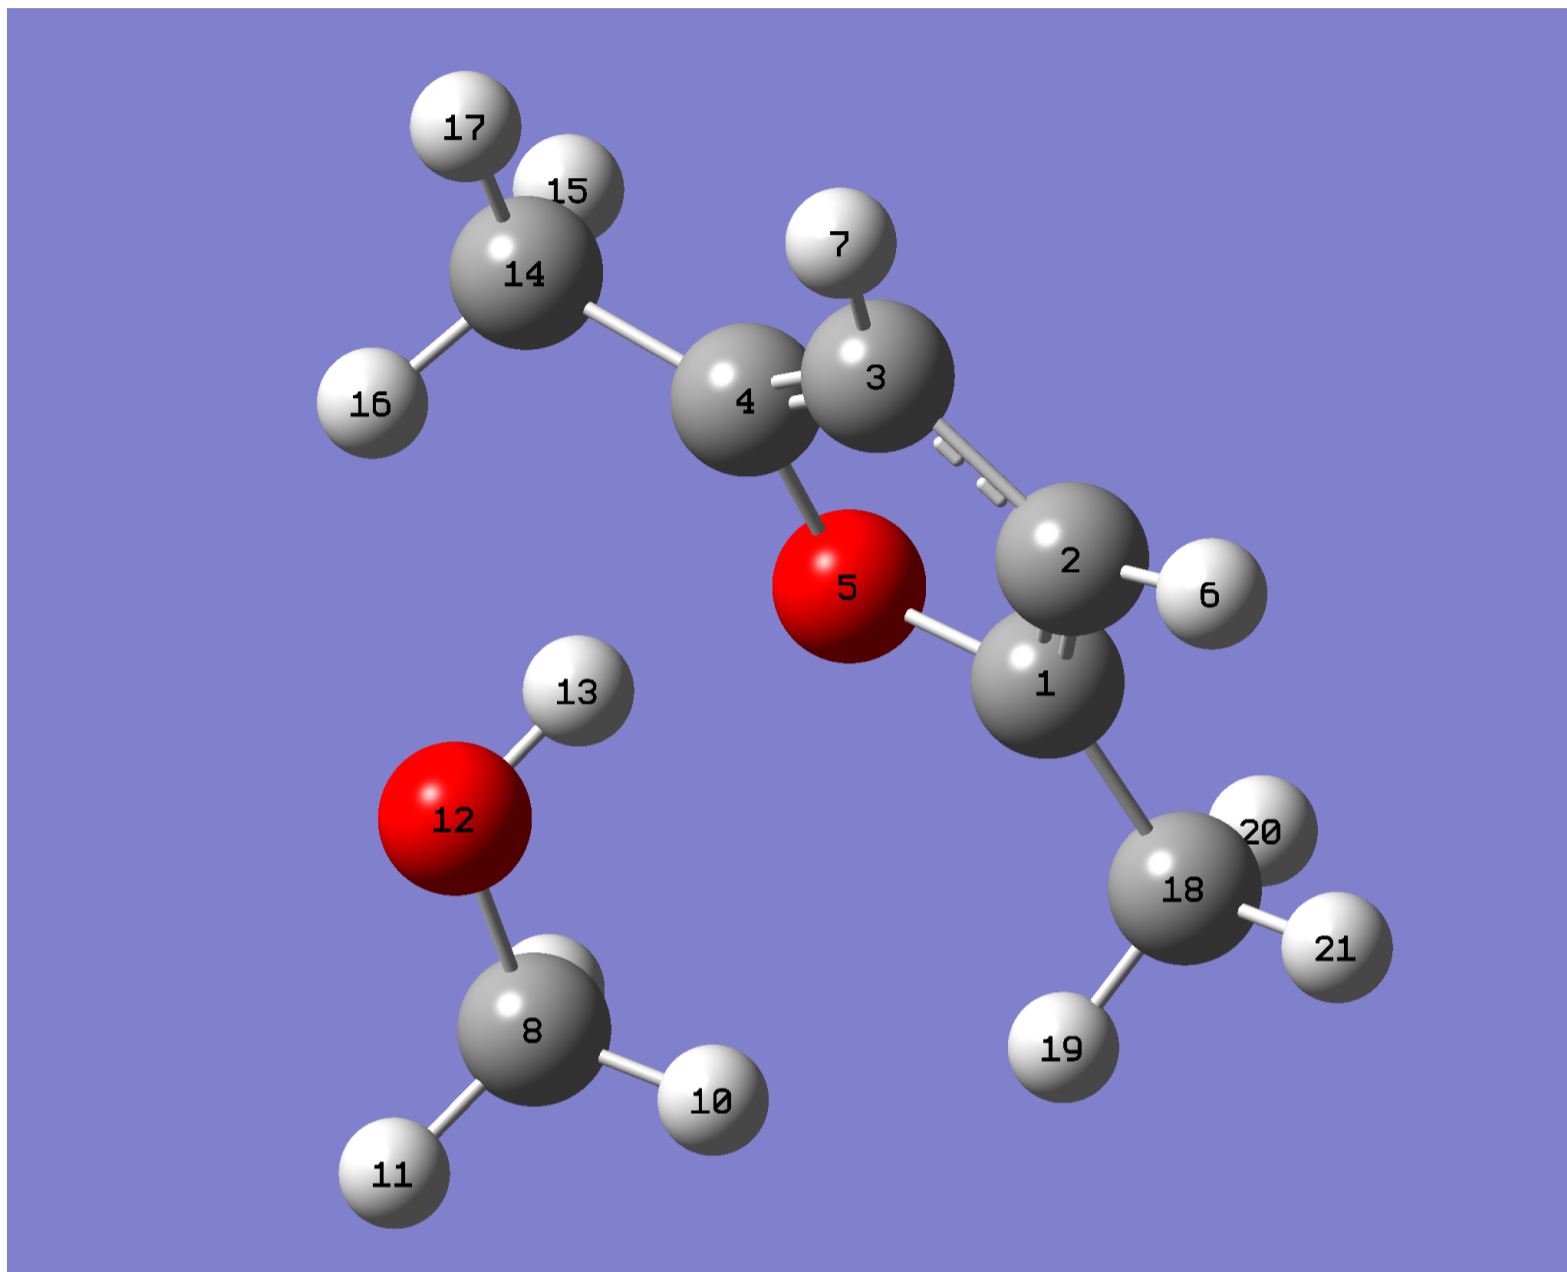

Figure S24:  $\pi$ -bonded methanol – 2,5-dimethylfuran conformation

Table S24:  $\pi$ -bonded methanol – 2,5-dimethylfuran structure.

| #  | N | ref atom |   |   | Bond      | Angle       | Dihedral     | X          | Y          | Z          |
|----|---|----------|---|---|-----------|-------------|--------------|------------|------------|------------|
|    |   | A        | B | C |           |             |              |            |            |            |
| 1  | C |          |   |   |           |             | 1.4084540    | -0.2559170 | 0.0363630  |            |
| 2  | C | 1        |   |   | 1.3624209 |             | 1.1181360    | 0.0946150  | 1.3205100  |            |
| 3  | C | 2        | 1 |   | 1.4389998 | 106.6407046 | 0.1351340    | 1.1431150  | 1.2492700  |            |
| 4  | C | 3        | 2 | 1 | 1.3647028 | 106.6734863 | 0.0433847    | -0.1092340 | 1.3613870  | -0.0755150 |
| 5  | O | 4        | 3 | 2 | 1.3718076 | 109.2881755 | 0.0812607    | 0.6621650  | 0.5097910  | -0.8249040 |
| 6  | H | 2        | 1 | 5 | 1.0783196 | 125.9592053 | -179.9797918 | 1.5518360  | -0.3373270 | 2.2082620  |
| 7  | H | 3        | 2 | 1 | 1.0786861 | 127.4864734 | -179.2761529 | -0.3210120 | 1.6722570  | 2.0711600  |
| 8  | C | 5        | 4 | 3 | 3.4623829 | 90.9661560  | 81.3133913   | -1.6046440 | -2.0624740 | -0.3420740 |
| 9  | H | 8        | 5 | 4 | 1.0954403 | 46.1463997  | 126.9990358  | -1.1458560 | -1.6116550 | -1.2287900 |
| 10 | H | 8        | 5 | 4 | 1.0957468 | 88.9551655  | -115.3911746 | -0.8347510 | -2.6098170 | 0.2132110  |
| 11 | H | 8        | 5 | 4 | 1.0897580 | 154.0723923 | 110.9445227  | -2.3677730 | -2.7699270 | -0.6656740 |
| 12 | O | 8        | 5 | 4 | 1.4209064 | 82.6496335  | -3.1604595   | -2.2542520 | -1.0931280 | 0.4686990  |
| 13 | H | 12       | 8 | 5 | 0.9633190 | 107.8239533 | -25.5202934  | -1.5871550 | -0.4682900 | 0.7729070  |
| 14 | C | 4        | 3 | 2 | 1.4854381 | 133.9968948 | 178.9050829  | -1.0134720 | 2.2739230  | -0.8212750 |
| 15 | H | 14       | 4 | 3 | 1.0929042 | 111.0986742 | 122.4850740  | -0.4503840 | 2.9115620  | -1.5074150 |
| 16 | H | 14       | 4 | 3 | 1.0929690 | 110.9670964 | -117.0623543 | -1.7461780 | 1.7089890  | -1.4031450 |
| 17 | H | 14       | 4 | 3 | 1.0901514 | 109.5681011 | 2.5151067    | -1.5511470 | 2.9101810  | -0.1180600 |
| 18 | C | 1        | 2 | 3 | 1.4854232 | 134.0347047 | -179.7967097 | 2.3190710  | -1.2541460 | -0.5807250 |
| 19 | H | 18       | 1 | 2 | 1.0933508 | 111.1653934 | 119.4839245  | 1.7623510  | -1.9770320 | -1.1831490 |
| 20 | H | 18       | 1 | 2 | 1.0930407 | 111.1740182 | -120.3023066 | 3.0532060  | -0.7704470 | -1.2302010 |
| 21 | H | 18       | 1 | 2 | 1.0902801 | 109.6007882 | -0.4006180   | 2.8528880  | -1.7948180 | 0.2012110  |

S1.3.7 2,5-dimethylfuran  $\pi$ -bonded low TS PiloTS

up to table of contents

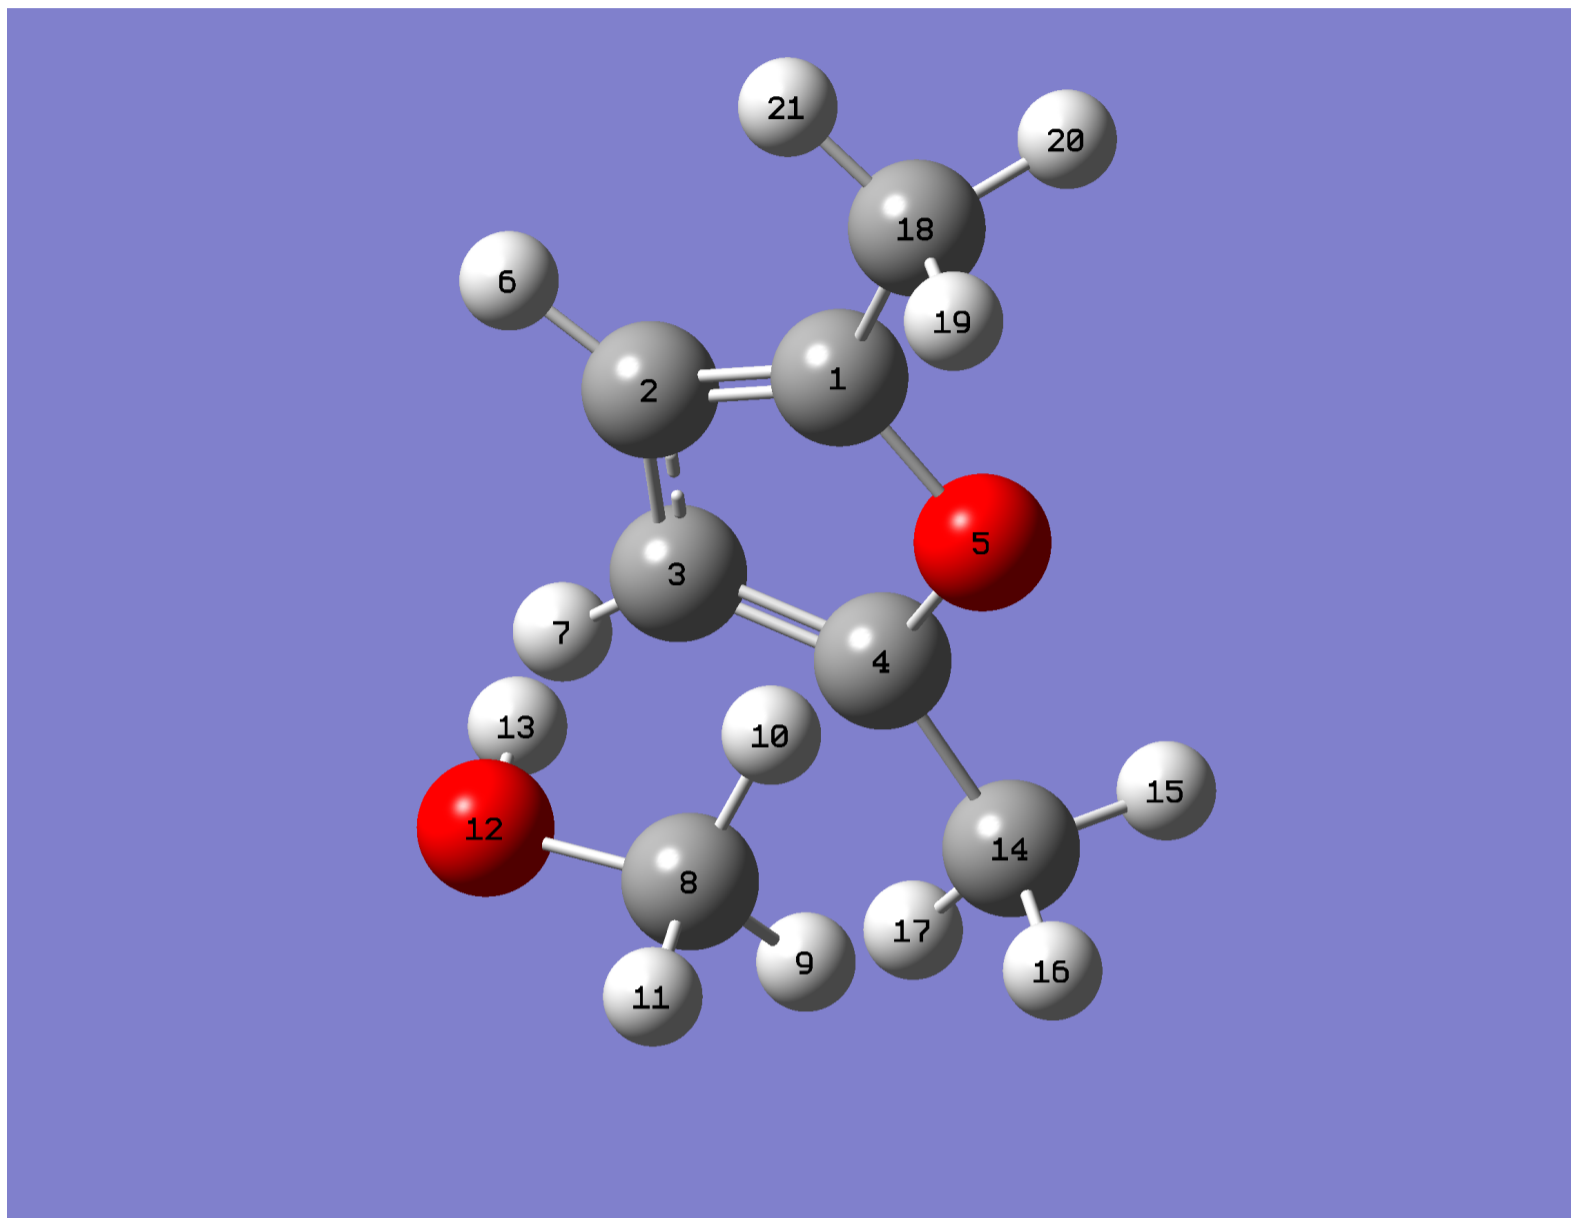

Figure S25:  $\pi$ -bonded methanol – 2,5-dimethylfuran transition state of lowest energy.

Table S25:  $\pi$ -bonded methanol – 2-methylfuran transition state of lowest energy.

| #  | N | ref atom |   |   | Bond      | Angle       | Dihedral     | X          | Y          | Z          |
|----|---|----------|---|---|-----------|-------------|--------------|------------|------------|------------|
|    |   | A        | B | C |           |             |              |            |            |            |
| 1  | C |          |   |   |           |             | -0.8588720   | 1.1099270  | 0.0155860  |            |
| 2  | C | 1        |   |   | 1.3636815 |             | -0.7285660   | 0.7196550  | 1.3157150  |            |
| 3  | C | 2        | 1 |   | 1.4393070 | 106.6300326 | -0.7285660   | -0.7196520 | 1.3157160  |            |
| 4  | C | 3        | 2 | 1 | 1.3636815 | 106.6300850 | 0.0000000    | -0.8588730 | -1.1099270 | 0.0155880  |
| 5  | O | 4        | 3 | 2 | 1.3718541 | 109.3646926 | -0.0332339   | -0.9400250 | -0.0000010 | -0.7865730 |
| 6  | H | 2        | 1 | 5 | 1.0784835 | 125.8853845 | -179.6535609 | -0.6479730 | 1.3759520  | 2.1677160  |
| 7  | H | 3        | 2 | 1 | 1.0784838 | 127.4836794 | -179.6802195 | -0.6479740 | -1.3759470 | 2.1677190  |
| 8  | C | 5        | 4 | 3 | 3.4673901 | 85.9978095  | 84.5270699   | 2.5267900  | -0.0000020 | -0.7234240 |
| 9  | H | 8        | 5 | 4 | 1.0956577 | 62.7026589  | 59.8061335   | 2.0316090  | -0.8894380 | -1.1285970 |
| 10 | H | 8        | 5 | 4 | 1.0956580 | 62.7026336  | -168.2031923 | 2.0316090  | 0.8894330  | -1.1286000 |
| 11 | H | 8        | 5 | 4 | 1.0896987 | 161.2528371 | 125.8014518  | 3.5648830  | -0.0000030 | -1.0547940 |
| 12 | O | 8        | 5 | 4 | 1.4194741 | 91.7171546  | -54.1985146  | 2.5434780  | 0.0000000  | 0.6959520  |
| 13 | H | 12       | 8 | 5 | 0.9627137 | 107.4534742 | 0.0000000    | 1.6285450  | 0.0000010  | 0.9954770  |
| 14 | C | 4        | 3 | 2 | 1.4856022 | 133.8955497 | -179.6833916 | -0.9326310 | -2.4304540 | -0.6610080 |
| 15 | H | 14       | 4 | 3 | 1.0931522 | 111.1587174 | 118.6042574  | -1.8843210 | -2.5528600 | -1.1847300 |
| 16 | H | 14       | 4 | 3 | 1.0930596 | 111.2483696 | -121.1302009 | -0.1291560 | -2.5459180 | -1.3930430 |
| 17 | H | 14       | 4 | 3 | 1.0901579 | 109.5520791 | -1.2873467   | -0.8406490 | -3.2253620 | 0.0793330  |
| 18 | C | 1        | 2 | 3 | 1.4856031 | 133.8955688 | 179.6834275  | -0.9326290 | 2.4304530  | -0.6610140 |
| 19 | H | 18       | 1 | 2 | 1.0930593 | 111.2483498 | 121.1302395  | -0.1291540 | 2.5459140  | -1.3930490 |
| 20 | H | 18       | 1 | 2 | 1.0931522 | 111.1587428 | -118.6041848 | -1.8843190 | 2.5528590  | -1.1847360 |
| 21 | H | 18       | 1 | 2 | 1.0901580 | 109.5520775 | 1.2873507    | -0.8406470 | 3.2253630  | 0.0793250  |

S1.3.8 2,5-dimethylfuran  $\pi$ -bonded high TS PihITS

up to table of contents

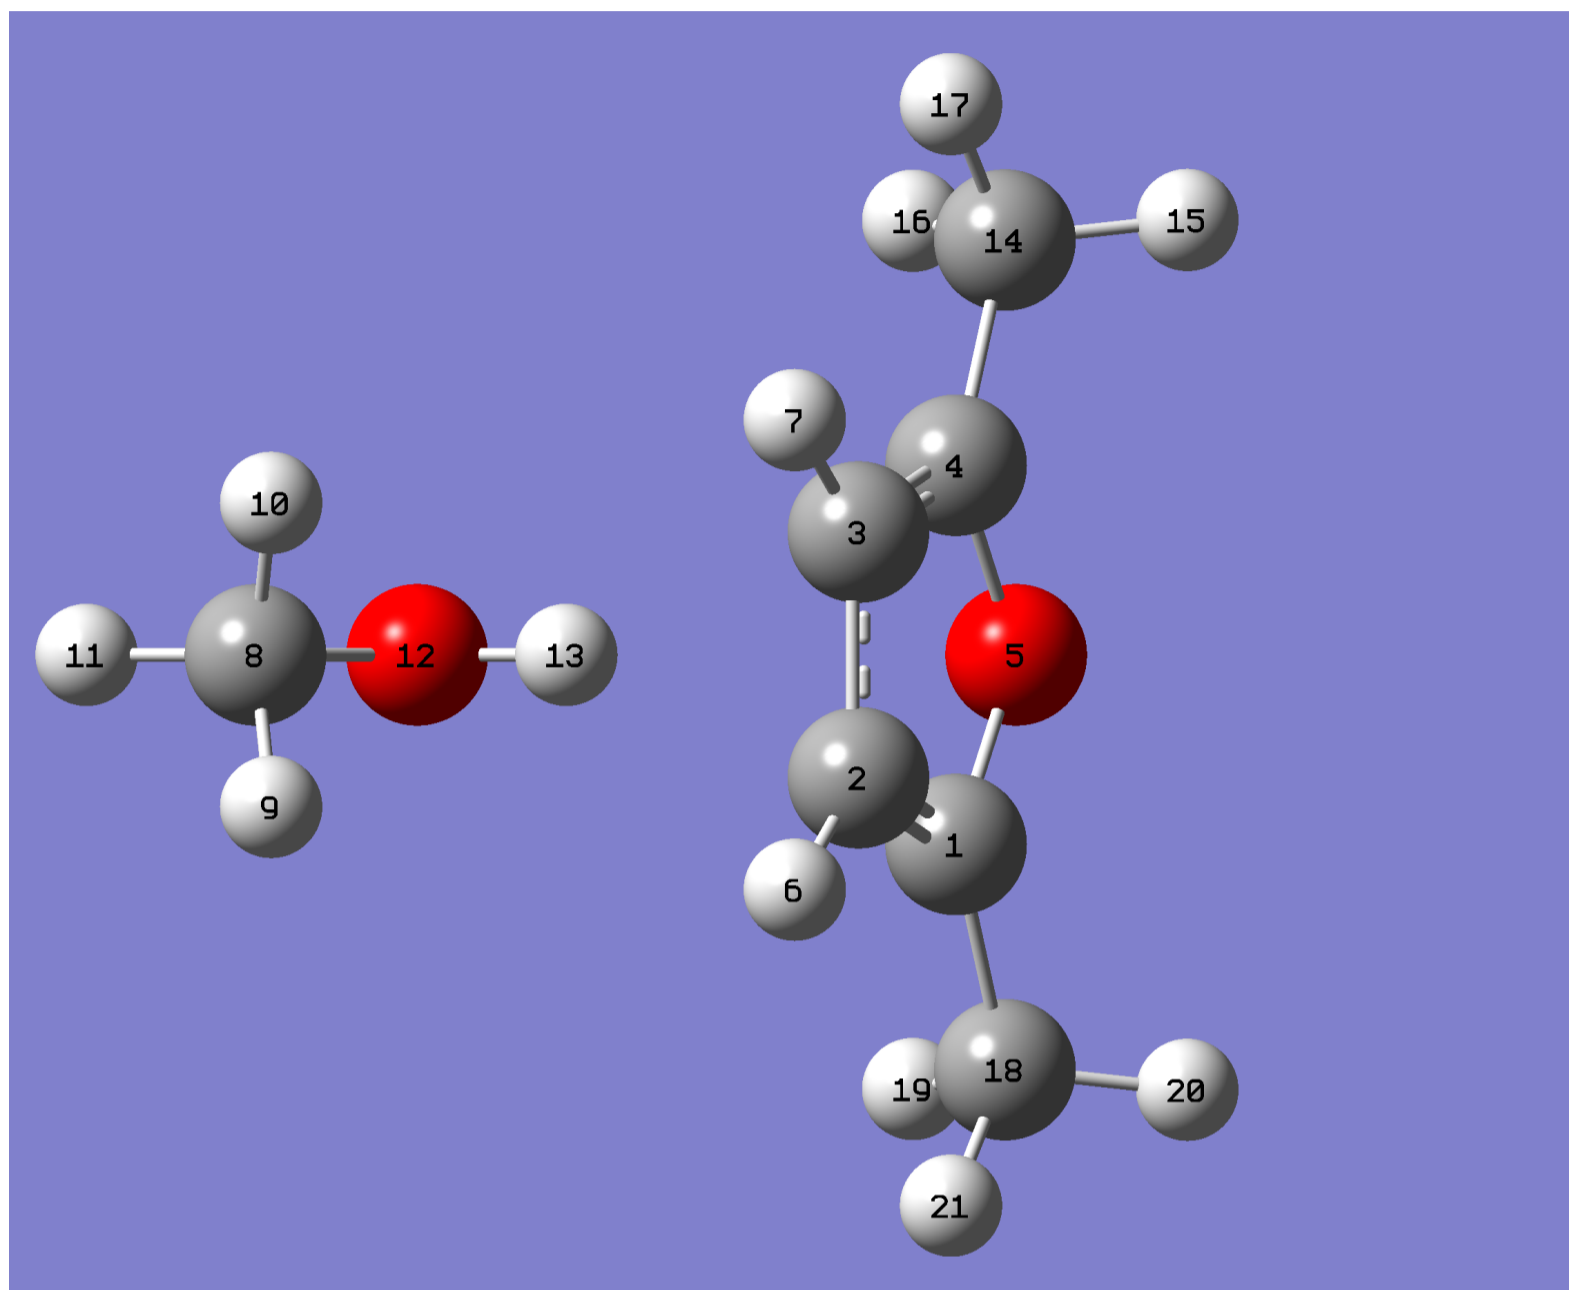

Figure S26:  $\pi$ -bonded methanol – 2,5-dimethylfuran transition state of highest energy.

Table S26:  $\pi$ -bonded methanol – 2,5-dimethylfuran transition state of highest energy.

| #  | ref atom |    |   |   | Bond      | Angle       | Dihedral     | X          | Y          | Z          |
|----|----------|----|---|---|-----------|-------------|--------------|------------|------------|------------|
|    | N        | A  | B | C |           |             |              |            |            |            |
| 1  | C        |    |   |   |           |             | 0.9371660    | -1.1108940 | 0.1157600  |            |
| 2  | C        | 1  |   |   | 1.3635608 |             | 0.3652620    | -0.7194610 | 1.2900700  |            |
| 3  | C        | 2  | 1 |   | 1.4389210 | 106.6824298 | 0.3652620    | 0.7194600  | 1.2900700  |            |
| 4  | C        | 3  | 2 | 1 | 1.3635611 | 106.6824700 | 0.0000000    | 0.9371660  | 1.1108940  | 0.1157600  |
| 5  | O        | 4  | 3 | 2 | 1.3728594 | 109.3013381 | 0.0540367    | 1.2892500  | 0.0000000  | -0.6099770 |
| 6  | H        | 2  | 1 | 5 | 1.0784231 | 125.8474437 | -179.8952851 | -0.0073200 | -1.3755140 | 2.0606370  |
| 7  | H        | 3  | 2 | 1 | 1.0784238 | 127.4698823 | -179.8378376 | -0.0073200 | 1.3755130  | 2.0606380  |
| 8  | C        | 3  | 2 | 1 | 3.7866960 | 79.0474045  | 97.6807985   | -3.1647240 | 0.0000000  | 0.1236040  |
| 9  | H        | 8  | 3 | 2 | 1.0959427 | 84.1963677  | 31.5993795   | -3.0731340 | -0.8906940 | 0.7555580  |
| 10 | H        | 8  | 3 | 2 | 1.0959427 | 65.7984616  | 145.1435330  | -3.0731340 | 0.8906940  | 0.7555580  |
| 11 | H        | 8  | 3 | 2 | 1.0896164 | 167.2642981 | -148.8965503 | -4.1536530 | 0.0000000  | -0.3338710 |
| 12 | O        | 8  | 3 | 2 | 1.4196771 | 66.9030062  | -85.2658769  | -2.2177800 | 0.0000000  | -0.9341200 |
| 13 | H        | 12 | 8 | 3 | 0.9617065 | 107.0718897 | 11.9204651   | -1.3445190 | 0.0000000  | -0.5312620 |
| 14 | C        | 4  | 3 | 2 | 1.4854498 | 134.0510247 | 179.2182253  | 1.2230800  | 2.4299790  | -0.5045860 |
| 15 | H        | 14 | 4 | 3 | 1.0929972 | 111.1277075 | 121.2951477  | 2.2910200  | 2.5477850  | -0.7052570 |
| 16 | H        | 14 | 4 | 3 | 1.0929813 | 111.0148387 | -118.4037792 | 0.6861270  | 2.5432230  | -1.4498190 |
| 17 | H        | 14 | 4 | 3 | 1.0902397 | 109.5691850 | 1.3893535    | 0.9076410  | 3.2266210  | 0.1695670  |
| 18 | C        | 1  | 2 | 3 | 1.4854503 | 134.0510151 | -179.2182021 | 1.2230800  | -2.4299790 | -0.5045870 |
| 19 | H        | 18 | 1 | 2 | 1.0929812 | 111.0148204 | 118.4037786  | 0.6861270  | -2.5432220 | -1.4498200 |
| 20 | H        | 18 | 1 | 2 | 1.0929972 | 111.1277089 | -121.2951499 | 2.2910200  | -2.5477850 | -0.7052580 |
| 21 | H        | 18 | 1 | 2 | 1.0902397 | 109.5691540 | -1.3893750   | 0.9076410  | -3.2266210 | 0.1695660  |

## S2 Method details

Geometries, 1D-scans and frequencies were obtained at B2PLYP-D3/6-311++g(d,p) level throughout. Stationary points, *i.e.* minima and transition states (TSs), were optimized with the standard schemes within the gaussian09.d01 software [1]. An “ultra-ultrafine” density functional theory (DFT) integration grid of 199 radial shells and 974 angular points per atom was used and self-consistent field (SCF) convergence criteria were set to  $10^{11}E_h$ . Only for the methanol-2,5-dimethylfuran OH-bonded dimer this convergence couldn’t be achieved but was set to  $10^9E_h$  at least.

## S3 Electronic energies

### S3.1 Method details

Single-point energies (SPEs) were calculated using the ORCA 4.0.1 version for linux x86 64bit machines [2]. We employed two different families of basis sets: Ahlrichs basis sets def2-TZVPP and def2-QZVPP have been used with the corresponding auxiliary bases with suffix /c and extrapolated according to the formula provided by Liakos *et al.* [3, 4]:

$$E_{CBS} = \frac{E_{HF,QZ} \exp(-\alpha\sqrt{3}) - E_{HF,TZ} \exp(-\alpha\sqrt{4})}{\exp(-\alpha\sqrt{3}) - \exp(-\alpha\sqrt{4})} + \frac{3^\beta E_{CC,TZ} - 4^\beta E_{CC,QZ}}{3^\beta - 4^\beta} \quad (1)$$

The actual values of  $\alpha$  and  $\beta$  are “constants depending on the basis sets” and discussed in the earlier work by Neese *et al.* [3]. For triple- to quadruple- $\zeta$  basis set extrapolation of def2-Ahlrichs bases, the parameters read  $\alpha = 7.88$  and  $\beta = 2.97$ .

For augmented Dunning basis sets, for double- and triple- $\zeta$  extrapolation we employed  $\alpha = 4.30$  and  $\beta = 2.51^2$  and for triple- and quadruple extrapolation  $\alpha = 5.79$  and  $\beta = 3.05$ . For all delocalized pair natural orbital approximated (DLPNO) calculations, TightSCF and TightPNO settings were used<sup>3</sup> and were performed on 8 cores and 8 GB per core maximum RAM (openmpi-2.0.2 parallelization). In previous versions of gaussview, B2PLYP energies were incorrectly displayed, *i.e.* just the SCF energies were shown. We therefore created a perl script to replace B2PLYP SCF energies by the final perturbation-corrected energies. This is why most log filenames carry an “\_repl” extension – they contain replaced energies.

### S3.2 Methanol – furan system

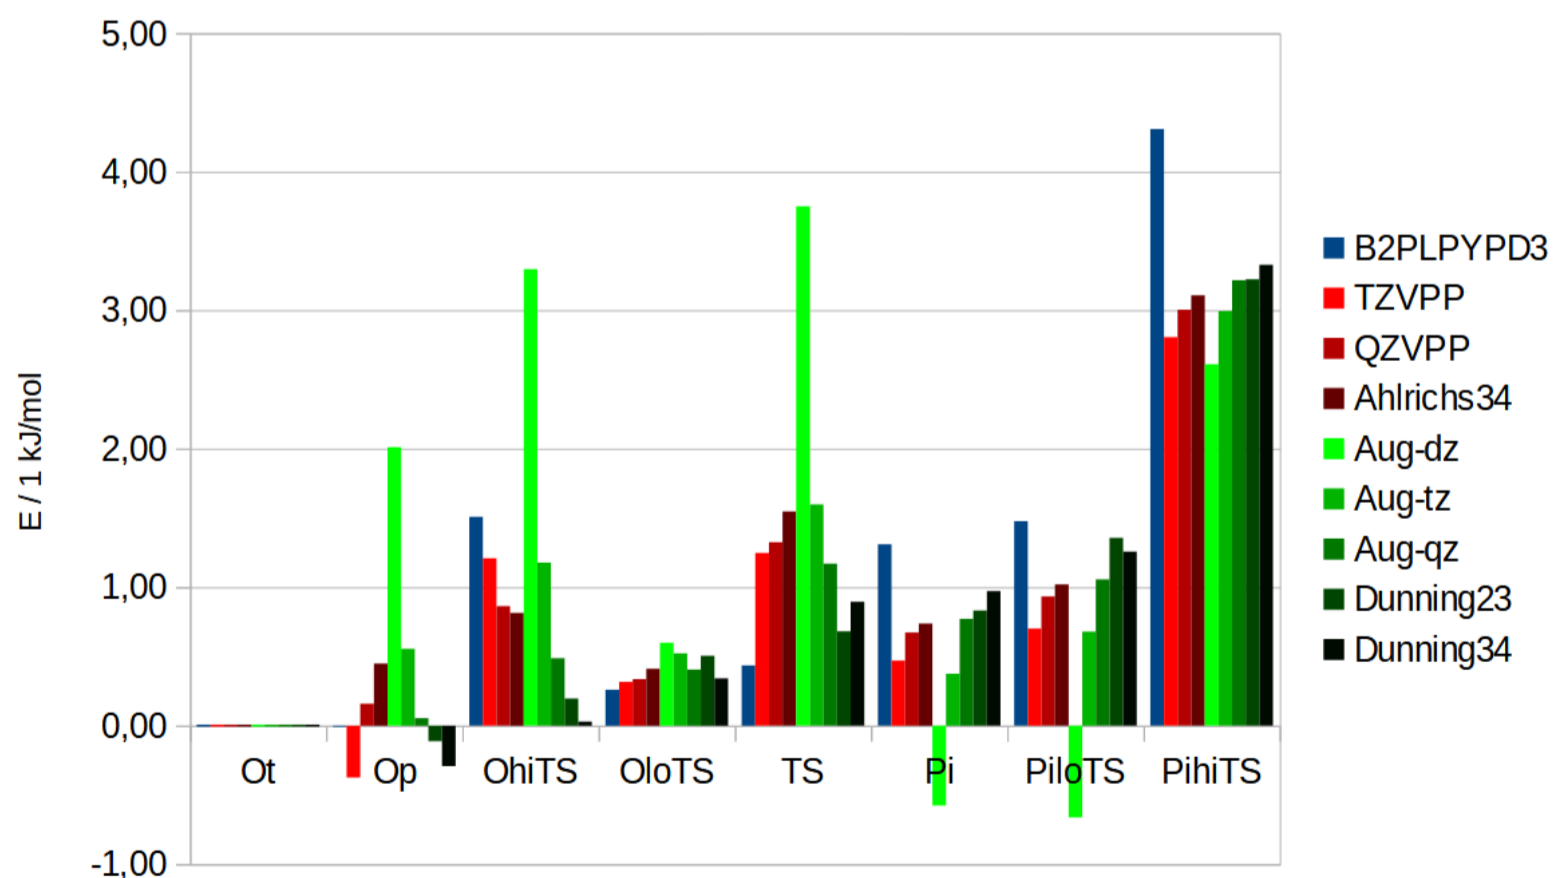

Figure S27: DLPNO-CCSD(T) energies with various basis sets for all stationary points of the methanol - furan dimer.

[up to table of contents](#)

<sup>2</sup>where in the equation QZ must be replaced by TZ and TZ by DZ and 4 by 3 and 3 by 2.

<sup>3</sup>we also set the mdci maxiter keyword to 100

Table S27: Methanol – furan dimer torsional angles, corresponding normal mode vibrational frequency, and energies.

|                                       | Ot               | Op                | OhiTS            | OloTS            | TS               | Pi                | PiloTS           | PihiTS           |
|---------------------------------------|------------------|-------------------|------------------|------------------|------------------|-------------------|------------------|------------------|
| $\theta_{C-O-O-C}$                    | -37.69084        | -95.11377         | 0=180            | 59.25            | -85.6796         | 165.22427         | -118.99142       | 57.12118         |
| $\nu_{\text{lowest}}$                 | 31.96            | 21.97             | -38.34           | -32.96           | -18.33           | 19.32             | -17.58           | -49.98           |
| Energies in hartree/particle          |                  |                   |                  |                  |                  |                   |                  |                  |
| B2PLYP                                | -345.52690678352 | -345.526909659779 | -345.52633201868 | -345.52680783815 | -345.52674103266 | -345.526407254569 | -345.52634403578 | -345.52526537014 |
| TZVPP                                 | -345.200355306   | -345.200497707    | -345.199894917   | -345.200234786   | -345.199879932   | -345.200176161    | -345.200088093   | -345.199286933   |
| QZVPP                                 | -345.297465936   | -345.297405401    | -345.297137413   | -345.297337519   | -345.296961043   | -345.29720956     | -345.297110529   | -345.296322189   |
| Ahrichs34                             | -345.35996490384 | -345.35979376554  | -345.35965474943 | -345.35980840438 | -345.35937563287 | -345.35968394696  | -345.35957629441 | -345.35878151664 |
| aug-dz                                | -344.911130756   | -344.910364607    | -344.909875195   | -344.909702152   | -344.911350329   | -344.911382916    | -344.911382916   | -344.910136297   |
| aug-tz                                | -345.21802434    | -345.217812707    | -345.217575705   | -345.217415327   | -345.217881328   | -345.217765354    | -345.217765354   | -345.216883541   |
| aug-qz                                | -345.306018987   | -345.305998128    | -345.305833148   | -345.305864669   | -345.305573266   | -345.305724786    | -345.305616721   | -345.304794117   |
| aug-(d,t)z                            | -345.37274207    | -345.372784713    | -345.372667091   | -345.372549557   | -345.372482297   | -345.372425032    | -345.372225274   | -345.371514152   |
| aug-(t,q)z                            | -345.359386929   | -345.359498098    | -345.359375601   | -345.359256648   | -345.359046067   | -345.359016437    | -345.358908246   | -345.358119718   |
| aug-5z                                | -345.333138088   | -345.333136014    |                  |                  |                  | -345.332827055    |                  |                  |
| Energies with respect to Ot in kJ/mol |                  |                   |                  |                  |                  |                   |                  |                  |
| B2PLYP                                | 0.00             | -0.01             | 1.51             | 0.26             | 0.44             | 1.31              | 1.48             | 4.31             |
| TZVPP                                 | 0.00             | -0.37             | 1.21             | 0.32             | 1.25             | 0.47              | 0.70             | 2.81             |
| QZVPP                                 | 0.00             | 0.16              | 0.86             | 0.34             | 1.33             | 0.67              | 0.93             | 3.00             |
| Ahrichs34                             | 0.00             | 0.45              | 0.81             | 0.41             | 1.55             | 0.74              | 1.02             | 3.11             |
| aug-dz                                | 0.00             | 2.01              | 3.30             | 0.60             | 3.75             | -0.58             | -0.66            | 2.61             |
| aug-tz                                | 0.00             | 0.56              | 1.18             | 0.52             | 1.60             | 0.38              | 0.68             | 3.00             |
| aug-qz                                | 0.00             | 0.05              | 0.49             | 0.41             | 1.17             | 0.77              | 1.06             | 3.22             |
| aug-(d,t)z                            | 0.00             | -0.11             | 0.20             | 0.51             | 0.68             | 0.83              | 1.36             | 3.22             |
| aug-(t,q)z                            | 0.00             | -0.29             | 0.03             | 0.34             | 0.89             | 0.97              | 1.26             | 3.33             |
| aug-5z                                | 0.00             | 0.01              |                  |                  |                  | 0.82              |                  |                  |

### S3.3 Methanol – 2-methylfuran system

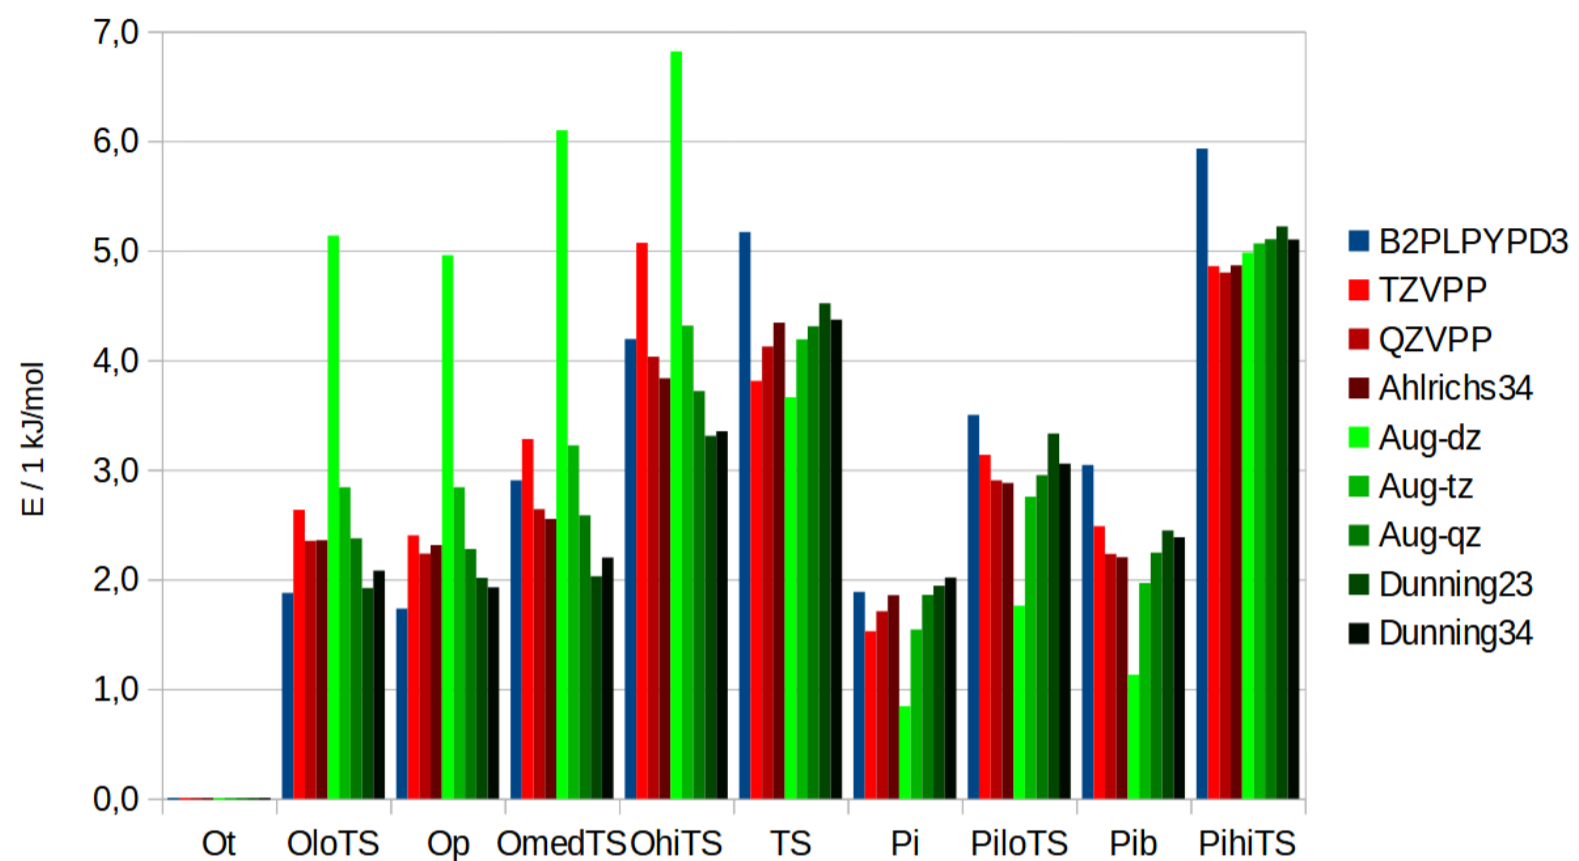

Figure S28: DLPNO-CCSD(T) energies with various basis sets for all stationary points of the methanol - 2-methylfuran dimer.

up to table of contents

### S3.4 Methanol – 2,5-dimethylfuran system

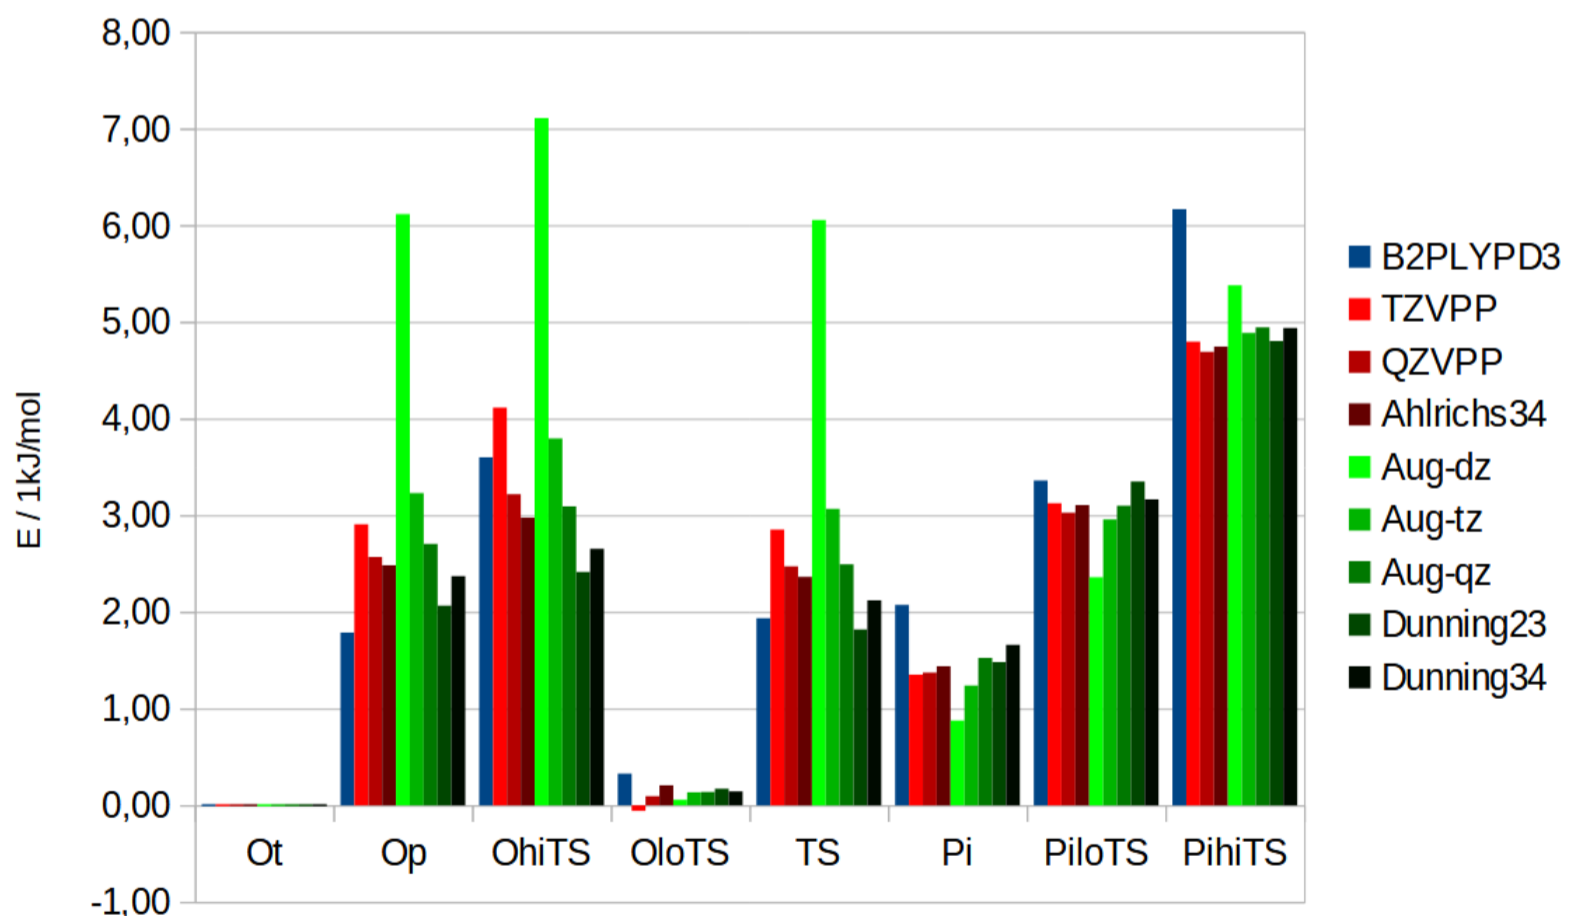

Figure S29: DLPNO-CCSD(T) energies with various basis sets for all stationary points of the methanol - 2,5-dimethylfuran dimer.

up to table of contents

## S4 Hindered rotor results

The TAMkin [5] Python library version 1.2.6 is licensed under the GNU General Public License v3.0 and can be obtained via pip, conda, or manually from the project's GitHub page.

The TAMkinTools code developed in this study is available under MIT license on GitLab of RWTH Aachen University at <https://git.rwth-aachen.de/Wassja.Kopp/tamkintools>. The version released for this study will be committed to a separate publication branch.

Table S28: Methanol – 2-methylfuran torsional angles, corresponding normal mode vibrational frequency, and energies.

|                                       | Ot               | OloTS            | Op               | OmedTS           | OhiTS            | TS               | Pi               | PiloTS           | Pib              | PihiTS           |
|---------------------------------------|------------------|------------------|------------------|------------------|------------------|------------------|------------------|------------------|------------------|------------------|
| $\theta_{C-O-O-C}$                    | 40.04135         | -77.19415        | -104.87742       | -45.26506        | -178.4621        | -144.31447       | 65.75423         | 1.20334          | 33.81733         | -150.69257       |
| $\nu_{\text{lowest}}$                 | 35.41            | -21.85           | 12.94            | -23.68           | -41.82           | -39.385          | 31.30            | -28.90           | 32.75            | -26.71           |
| Energies in hartree/particle          |                  |                  |                  |                  |                  |                  |                  |                  |                  |                  |
| B2PLYP                                | -384.81648165959 | -384.81576671896 | -384.81582091994 | -384.81537554232 | -384.81488430883 | -384.81451212381 | -384.81576351502 | -384.81514792965 | -384.81532179986 | -384.81422212591 |
| TZVPP                                 | -384.449591006   | -384.448586744   | -384.448676268   | -384.448341888   | -384.447659513   | -384.448139217   | -384.449009446   | -384.448395768   | -384.448643923   | -384.447739821   |
| QZVPP                                 | -384.557625353   | -384.556729749   | -384.556774392   | -384.55661931    | -384.556090057   | -384.556054455   | -384.556974008   | -384.556519563   | -384.556775117   | -384.555796708   |
| Ahrichs34                             | -384.62724748385 | -384.62634998061 | -384.62636613859 | -384.62627568563 | -384.62578646773 | -384.6255935791  | -384.62654048342 | -384.62614983627 | -384.62640817097 | -384.62539467288 |
| aug-dz                                | -384.126160805   | -384.124204166   | -384.124272448   | -384.12383781    | -384.123564056   | -384.124765515   | -384.125839625   | -384.125490724   | -384.125730113   | -384.124263812   |
| aug-tz                                | -384.469758365   | -384.468675853   | -384.468676624   | -384.468531069   | -384.468114062   | -384.468162795   | -384.46917075    | -384.468708839   | -384.469009543   | -384.467828916   |
| aug-qz                                | -384.567142605   | -384.566238186   | -384.56627548    | -384.566157869   | -384.565725964   | -384.565501449   | -384.566434111   | -384.566017584   | -384.566287824   | -384.565198961   |
| aug-(d,t)z                            | -384.643255845   | -384.642523226   | -384.642482901   | -384.642488653   | -384.641994797   | -384.641534909   | -384.642516269   | -384.641987506   | -384.642323273   | -384.641267391   |
| aug-(t,q)z                            | -384.626237011   | -384.625444292   | -384.625502558   | -384.625398939   | -384.62495978    | -384.624572571   | -384.625468865   | -384.625072937   | -384.625329311   | -384.624294298   |
| Energies with respect to Ot in kJ/mol |                  |                  |                  |                  |                  |                  |                  |                  |                  |                  |
| B2PLYP                                | 0                | 1.88             | 1.73             | 2.90             | 4.19             | 5.17             | 1.89             | 3.50             | 3.05             | 5.93             |
| TZVPP                                 | 0                | 2.64             | 2.40             | 3.28             | 5.07             | 3.81             | 1.53             | 3.14             | 2.49             | 4.86             |
| QZVPP                                 | 0                | 2.35             | 2.23             | 2.64             | 4.03             | 4.12             | 1.71             | 2.90             | 2.23             | 4.80             |
| Ahrichs34                             | 0                | 2.36             | 2.31             | 2.55             | 3.84             | 4.34             | 1.86             | 2.88             | 2.20             | 4.86             |
| aug-dz                                | 0                | 5.14             | 4.96             | 6.10             | 6.82             | 3.66             | 0.84             | 1.76             | 1.13             | 4.98             |
| aug-tz                                | 0                | 2.84             | 2.84             | 3.22             | 4.32             | 4.19             | 1.54             | 2.76             | 1.97             | 5.07             |
| aug-qz                                | 0                | 2.37             | 2.28             | 2.59             | 3.72             | 4.31             | 1.86             | 2.95             | 2.24             | 5.10             |
| aug-(d,t)z                            | 0                | 1.92             | 2.01             | 2.03             | 3.31             | 4.52             | 1.94             | 3.33             | 2.45             | 5.22             |
| aug-(t,q)z                            | 0                | 2.08             | 1.93             | 2.20             | 3.35             | 4.37             | 2.02             | 3.06             | 2.38             | 5.10             |



Table S29: Methanol – 2,5-dimethylfuran torsional angles, corresponding normal mode vibrational frequency, and energies.

|                                       | Ot               | Op               | OhTS             | OloTS             | TS                | Pi               | PiloTS           | PihiTS           |
|---------------------------------------|------------------|------------------|------------------|-------------------|-------------------|------------------|------------------|------------------|
| $\theta_{C-O-O-C}$                    | 43.16909         | -94.77078        | 156.00091        | 57.93             | 79.1              | 71.3838          | 15.1597          | -160.09          |
| $\nu_{\text{lowest}}$                 | 37.05            | 13.58            | -31.82           | -31.81            | -21.12            | 34.11            | -36.69           | -64.71           |
| Energies in hartree/particle          |                  |                  |                  |                   |                   |                  |                  |                  |
| B2PLYP                                | -424.10509159429 | -424.10441120463 | -424.10372117947 | -424.10496701329  | -424.104354305    | -424.10430257468 | -424.10381200814 | -424.10274331964 |
| TZVPP                                 | -423.697755862   | -423.696648709   | -423.696188297   | -423.697777935    | -423.696669785    | -423.697241964   | -423.696566643   | -423.695929061   |
| QZVPP                                 | -423.816865977   | -423.815887413   | -423.81563963    | -423.816830489    | -423.815924187    | -423.816343776   | -423.815712603   | -423.815079121   |
| (T.Q)ZVPP                             | -423.89364978186 | -423.89270492917 | -423.89251595878 | -423.893571287405 | -423.892749922679 | -423.89310174332 | -423.89246713815 | -423.89184287869 |
| aug-dz                                | -423.340313485   | -423.337984665   | -423.337606277   | -423.340292068    | -423.338007877    | -423.339979591   | -423.339415479   | -423.338264072   |
| aug-tz                                | -423.720475349   | -423.719244838   | -423.71902941    | -423.720424144    | -423.719308113    | -423.720003355   | -423.719348564   | -423.718614411   |
| aug-qz                                | -423.827355813   | -423.826326136   | -423.826178965   | -423.827303442    | -423.826406239    | -423.826775235   | -423.826174982   | -423.825473293   |
| aug-(d,t)z                            | -423.912653487   | -423.911866556   | -423.911734088   | -423.912588110035 | -423.911961259987 | -423.912089084   | -423.911377884   | -423.910825034   |
| aug-(t,q)z                            | -423.892236241   | -423.891334125   | -423.891226185   | -423.892181331285 | -423.891428188959 | -423.891604354   | -423.891031631   | -423.890356551   |
| Energies with respect to Ot in kJ/mol |                  |                  |                  |                   |                   |                  |                  |                  |
| B2PLYP                                | 0.00             | 1.79             | 3.60             | 0.33              | 1.94              | 2.07             | 3.36             | 6.17             |
| TZVPP                                 | 0.00             | 2.91             | 4.12             | -0.06             | 2.85              | 1.35             | 3.12             | 4.80             |
| QZVPP                                 | 0.00             | 2.57             | 3.22             | 0.09              | 2.47              | 1.37             | 3.03             | 4.69             |
| (T.Q)ZVPP                             | 0.00             | 2.48             | 2.98             | 0.21              | 2.36              | 1.44             | 3.11             | 4.74             |
| aug-dz                                | 0.00             | 6.11             | 7.11             | 0.06              | 6.05              | 0.88             | 2.36             | 5.38             |
| aug-tz                                | 0.00             | 3.23             | 3.80             | 0.13              | 3.06              | 1.24             | 2.96             | 4.89             |
| aug-qz                                | 0.00             | 2.70             | 3.09             | 0.14              | 2.49              | 1.52             | 3.10             | 4.94             |
| aug-(d,t)z                            | 0.00             | 2.07             | 2.41             | 0.17              | 1.82              | 1.48             | 3.35             | 4.80             |
| aug-(t,q)z                            | 0.00             | 2.37             | 2.65             | 0.14              | 2.12              | 1.66             | 3.16             | 4.94             |

## S4.1 Technical hints for working with TAMkin and TAMkinTools

We corrected the original rotor.py file of TAMkin for two issues: The first refers to lines 515 to 540 in the def potential(self). Here, we replace the line `deltas -= np.floor(deltas/a)*a` by `deltas -= (abs(np.floor(deltas/a))-0.5)*a` and `deltas = abs(deltas)`. The original version shifted the minimum to the right sometimes. The new version makes sure the correct minimum is taken.

The second issue is already corrected for in newer versions of TAMkin and refers to the construction of the design matrix near lines 250, 251. The old code reads: `ncos = min(dofmax, self.nmax/rotsym)` and this has to be adjusted to `ncos = min(dofmax, int(self.nmax/rotsym))`. This was coming from python2 where the “/” division returned an integer when both inputs were integers. In python3 this always produces a float which will cause problems for ncos if self.nmax/rotsym is bigger than dofmax.

## S4.2 Original scans used for the Goebench challenge

Here comes a technical description on what was done to the files obtained from Gaussian scans.

The originally submitted scans for the Goebench challenge [6] already contained some manual editing. We discuss these for the scans but use TAMkinTools throughout this study to obtain the corresponding manipulations.

### S4.2.1 Methanol - furan dimer

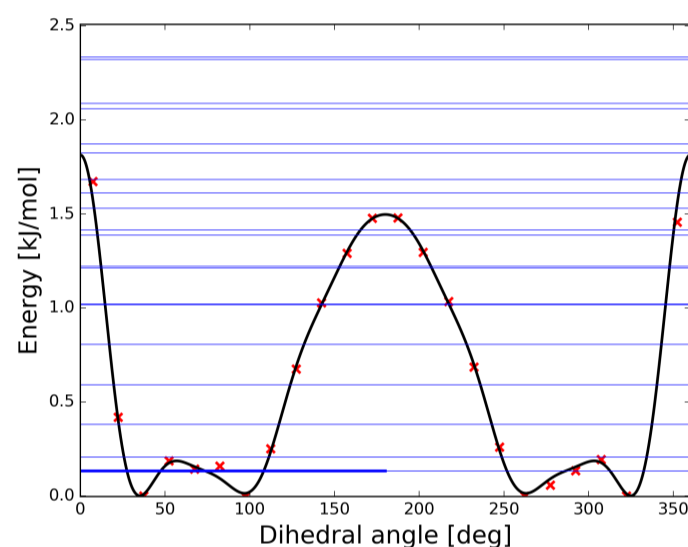

Figure S30: Methanol – furan OH scan treated like TAMkin rotors as submitted to the Goebench challenge [6, 7]. The scan was performed along the C–O–O–C dihedral involving the furan oxygen and an adjacent carbon as well as the methanol oxygen and carbon.

#### OH-bonded configuration:

```
OHb = load_molecule_g03fchk("OHbfreq.fchk")
scanOH = load_rotscan_g03log("OHb_scan1n_repl.log")
rotor = Rotor(scanOH, OHb, rotsym=1, cancel_freq='scan', even=True, dofmax=9, num_levels=level_prec)
```

The OHb\_scan1n has 24 points with -15 degrees. It starts in the “top” configuration, switches to “plane” and rotates back to “top”. The scan is used as is, but point 24 did not converge (“– Number of steps exceeded” instead of “– Stationary point found”) and the last point (number 25) was removed (“– Stationary point found”) because it seems stuck in the “plane” configuration but has the same dihedral angle value as the minimum and would confuse Tamkin.

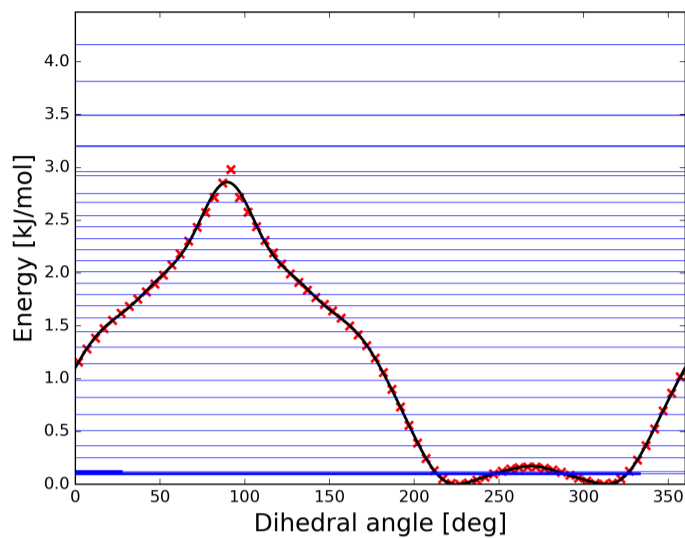

Figure S31: Methanol-furan  $\pi$  scan treated like TAMkin rotors as submitted to the Goebench challenge [6, 7]. The scan was performed along the C–C–O–C angle involving the two furan carbons opposite to the oxygen and the methanol oxygen and carbon (for  $\pi$ -bonded dimers, choosing a descriptive dihedral angle for the rotations was ambiguous since the methanol is  $\pi$ -stacked to the furan plane and one might choose any two reference atoms of the furan ring).

#### $\pi$ -bonded configuration:

```
PI      = load_molecule_g03fchk("PIfreq.fchk")
scanPI  = load_rotscan_g03log("PI_torsp_repl.log")
rotor   = Rotor(scanPI, PI, rotsym=1, cancel_freq='scan', even=False, dofmax=10, num_levels=level_prec)
```

The scan “PI\_torsp.log” was used as is. It contains 72 points (5 degrees distance). No changes were necessary. The scan shows a little jump at the maximum of the potential energy surface (PES) due to coupling

#### S4.2.2 Methanol – 2-methylfuran dimer

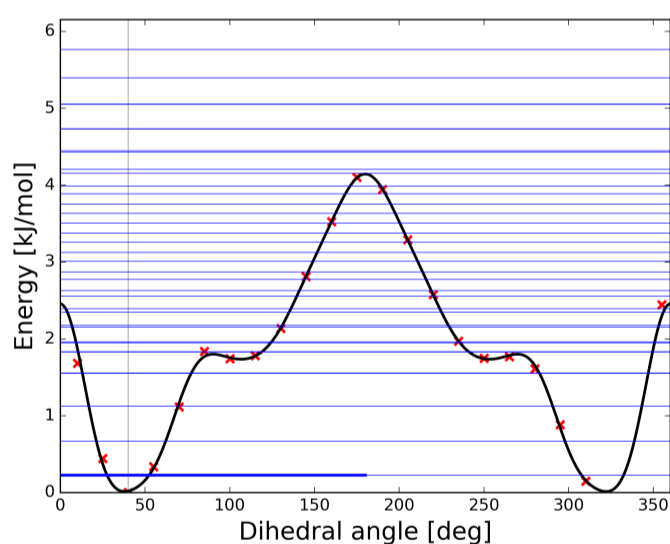

Figure S32: Methanol – 2-methylfuran OH scan close to those of Goebench challenge [6, 7]; for description cf. S30.

#### OH-bonded configuration:

```
OHa     = load_molecule_g03fchk("OHafreq.fchk")
OHb     = load_molecule_g03fchk("OHbfreq.fchk")
scanOH  = load_rotscan_g03log("scan_OHb_n_repl.log")
rotor   = Rotor(scanOH, OHb, rotsym=1, cancel_freq='scan', even=True, dofmax=10, num_levels=level_prec)
```

This scan starts in “top” configuration Ot and contains 24 steps of 15 degrees. Only the scan in negative direction “scan\_OHb\_n.log” was used where we erased points 4 to 6. The hindered rotor profile shows mirror symmetry, but, due to coupling, on the way from the lowest-energy Ot conformation to its mirror image, the energy raises further up and suddenly drops to the lowest-energy conformation mirror image, cf. Fig. S32. Therefore, three points were discarded and even symmetry was imposed on the fit.

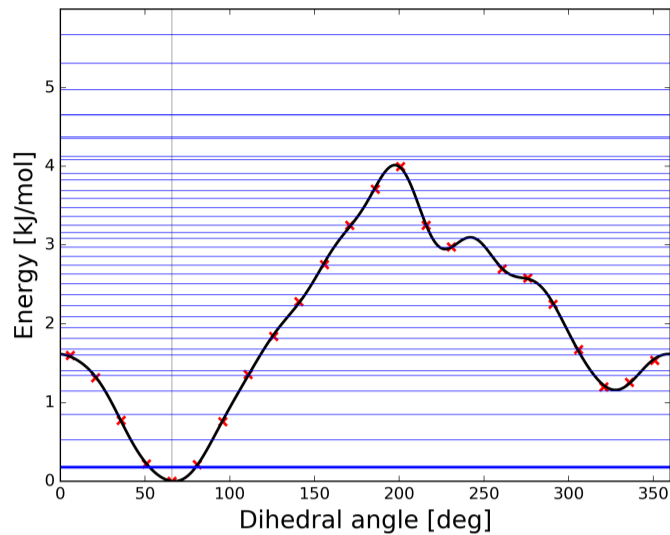

Figure S33: Methanol – 2-methylfuran  $\pi$  scan close to those of Goebench challenge [6, 7]; for description cf. S31.

**$\pi$ -bonded configuration:** For this unsymmetric partner 2-methylfuran, two  $\pi$ -bonded conformations exist. In one (PIa), the methanol oxygen is close to the branch carbon (with that our scan starts), in the other, it is most distant from it.

```
PIa      = load_molecule_g03fchk("PIafreq.fchk")
PIb      = load_molecule_g03fchk("PIbfreq.fchk")
scanPI   = load_rotscan_g03log("scan_PiA_p_repl.log")
rotor    = Rotor(scanPI, PIa, rotsym=1, cancel_freq='scan', even=False, dofmax=10, num_levels=level_prec)
```

The scan is based on PIa. It has been used as is, but one point (scan point 13 of the original scan) is completely deleted.

#### S4.2.3 Methanol - 2,5-dimethylfuran dimer

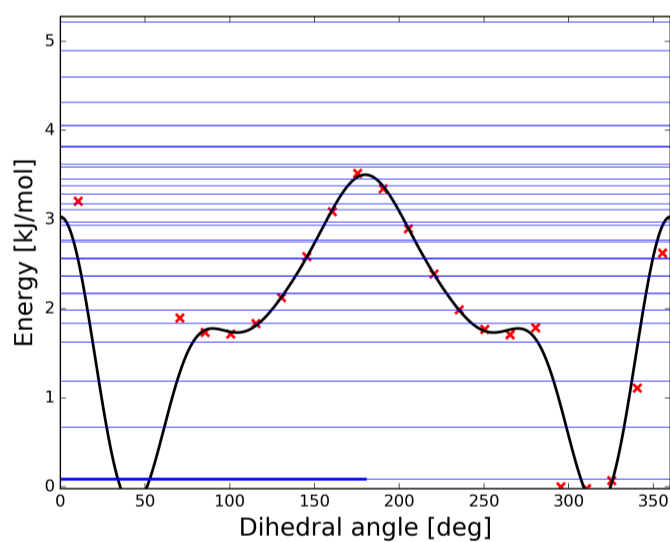

Figure S34: Methanol – 2,5-dimethylfuran OH scan close to those of Goebench challenge [6, 7]; for description cf. S30. The discontinuity near 280° causes the fit to undershoot the minimum.

**OH-bonded structure:**

```
OHa      = load_molecule_g03fchk("OHa.fchk")
OHb      = load_molecule_g03fchk("OHb.fchk")
scanOH   = load_rotscan_g03log("OHa_repl.log")
rotor    = Rotor(scanOH, OHb, rotsym=1, #cancel_freq='scan',
                 even=True, dofmax=7, num_levels=level_prec)
```

The OH-bonded methanol - 2,5-dimethylfuran dimer scan shows several discontinuities. The total scan profile is therefore combined from two scans in opposite directions<sup>4</sup>. The discontinuity (the steep jump) near the global minimum leads to undershooting of the fit below the zero of energy and a shift of the minimum, cf. Fig. S34. To partly remedy this, Originally, point 4 is repeated seven times to emphasize it; in this study we use the weights array instead, but the fit using 7 functions still does not satisfactorily reproduce the global minimum. The last scan points of OHa++ are discarded because they overlap with the scan in the opposite direction, but at higher energy.

<sup>4</sup>9 points in positive and 15 points in negative direction. In the overlap region, the points with higher energy were removed (from the positive-direction scan)

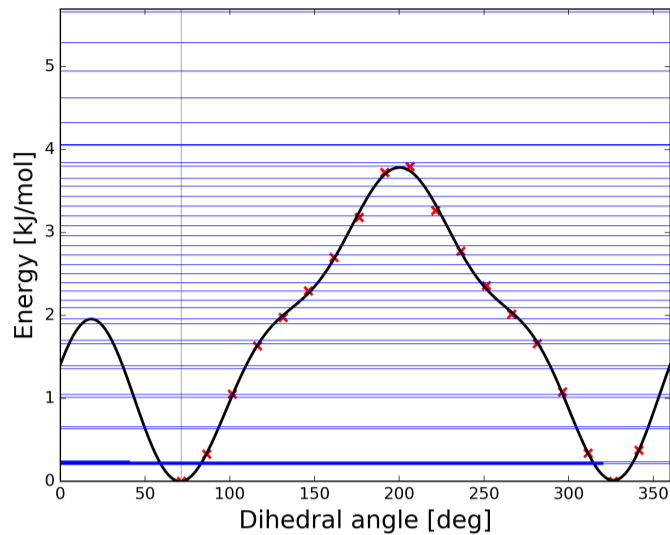

Figure S35: Methanol – 2,5-dimethylfuran  $\pi$  scan close to those of Goebench challenge [6, 7]; for description cf. S31.

#### $\pi$ -bonded configuration:

```
PI = load_molecule_g03fchk("PIfreq.fchk")
scanPI = load_rotscan_g03log("scan_PI_p_repl.log")
rotor = Rotor(scanPI, PI, rotsym=1, cancel_freq='scan', even=False, dofmax=5, num_levels=level_prec)
```

The scan was taken in positive direction for 24 steps of 15 degrees. For the  $\pi$ -bonded configuration of the methanol – 2,5-dimethylfuran dimer the continuous scan from Gaussian was satisfactorily fitted by 5 Fourier functions, cf. Fig S35<sup>5</sup>.

### S4.3 Improved Scans

#### S4.3.1 Methanol – furan dimer

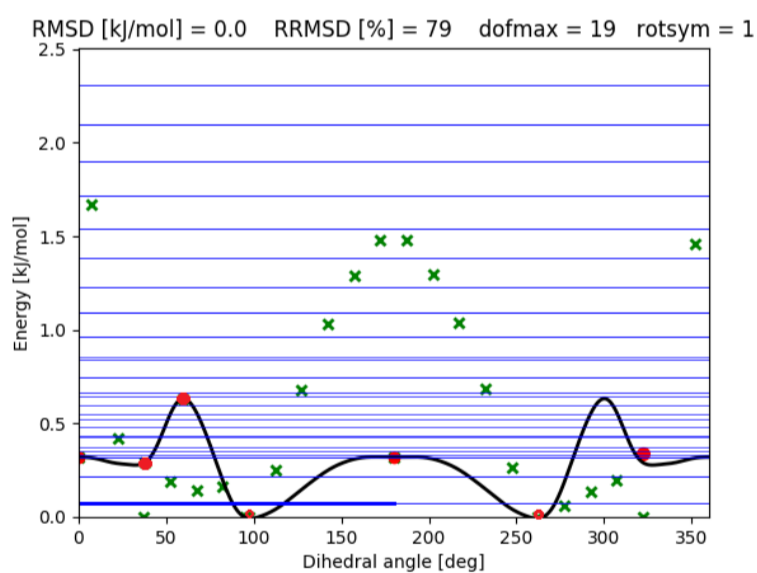

Figure S36: Methanol – furan OH scan improved by the TAMkinTools functions from this study. The scan points are the same as in Fig. S30 and the scan was performed along the C–O–O–C dihedral involving the furan oxygen and an adjacent carbon as well as the methanol oxygen and carbon.

#### OH bonded configuration

```
OHa = load_molecule_g03fchk("OHafreq.fchk",energy = -345.35949810)
OHb = load_molecule_g03fchk("OHbfreq.fchk",energy = -345.35938693)

scanOH = load_rotscan_g03log("OHb_scan1n_repl.log")
original_angle, original_energy = scanOH.potential
scanOH_erased = erase_point_scan(scanOH,23)

scanOH_added_tshigh = add_point(scanOH_erased, 180.0*np.pi/180.0, 0.321615812/2625.4995+ref_energy) #TShigh
scanOH_hi2 = add_point(scanOH_added_tshigh, 0.0*np.pi/180.0, 0.321615812/2625.4995+ref_energy) #TShi-0
scanOH_low = add_point(scanOH_hi2, 59.25*np.pi/180.0, 0.633926854/2625.4995+ref_energy) #TSlow
scanOH_ref1 = add_point(scanOH_low, 37.69*np.pi/180.0, 0.292/2625.4995+ref_energy)#first ref energy
scanOH_complete = add_point(scanOH_ref1, 95.11*np.pi/180.0, 0.0/2625.4995+ref_energy)#second ref energy
angles,energies = scanOH_complete.potential

myderivateposition = [180.0*np.pi/180.0,
0.0*np.pi/180.0,
59.25*np.pi/180.0,
37.69*np.pi/180.0,
95.11*np.pi/180.0]

thetas = np.asarray([0.0,59.25,180.0,360.0-59.25])/360.0*2.0*np.pi
```

<sup>5</sup>Only one point (no. 20) was discarded because it had issues with forming derivatives of the scf energy and the optimization aborted.

```
rotor = Opt_Rotor(scanOH_complete, OHb, rotsym=1, cancel_freq='scan', weights =myweights,
                 derivatives = myderivative, even=True, dofmax=14, num_levels=level_prec)
```

Inclusion of DLPNO-coupled-cluster singles, doubles, and perturbative triples (CCSD(T))/aug-cc-pv(t,q)z SPE makes the Op configuration the global minimum, cf. Fig. S37. Zero-point energy (ZPE) is also slightly lowered, mostly because the energies of the highest-energy TSs at DFT level become considerably lower at CCSD(T) level. The coupled-cluster energies can influence in principle even the frequencies (that correspond to the hindered rotation mode) at the minima *via* the corresponding change in curvature, though clearly more high-level points would be necessary to accurately reproduce coupled-cluster (CC) frequencies.

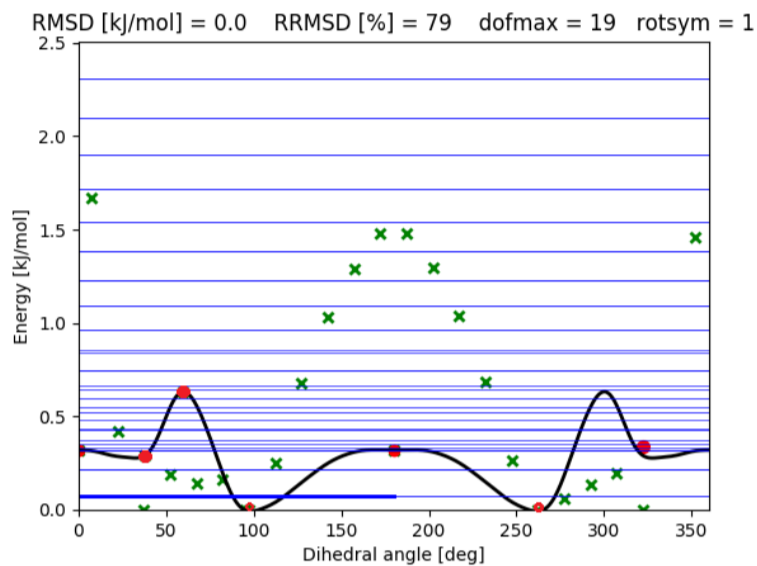

Figure S37: Methanol – furan OH scan improved by the TAMkinTools functions from this study. The scan points are the same as in Fig. S30 and the scan was performed along the C–O–O–C dihedral involving the furan oxygen and an adjacent carbon as well as the methanol oxygen and carbon.

### OH bonded configuration - 5z

```
OHa = load_molecule_g03fchk("OHa_flip_freq.fchk",energy = -345.33313601)
OHb = load_molecule_g03fchk("OHb_freq.fchk",energy = -345.33313809)

scanOH_added_tshigh = add_point(scanOH_erased, 180.0*np.pi/180.0, 0.344137/2625.4995+ref_energy) #TShigh
scanOH_hi2 = add_point(scanOH_added_tshigh, 0.0*np.pi/180.0, 0.344137/2625.4995+ref_energy) #TShi-0
scanOH_low = add_point(scanOH_hi2, 59.25*np.pi/180.0, 0.372661/2625.4995+ref_energy) #TSlow
scanOH_ref1 = add_point(scanOH_low, 37.69*np.pi/180.0, 0.00/2625.4995+ref_energy)#first ref energy
scanOH_complete = add_point(scanOH_ref1, 95.11*np.pi/180.0, 0.005445/2625.4995+ref_energy)#second ref energy
angles,energies = scanOH_complete.potential

rotor = Opt_Rotor(scanOH_complete, OHb, rotsym=1, cancel_freq='scan', weights =myweights,
                 derivatives = myderivative, even=True, dofmax=14, num_levels=level_prec)
```

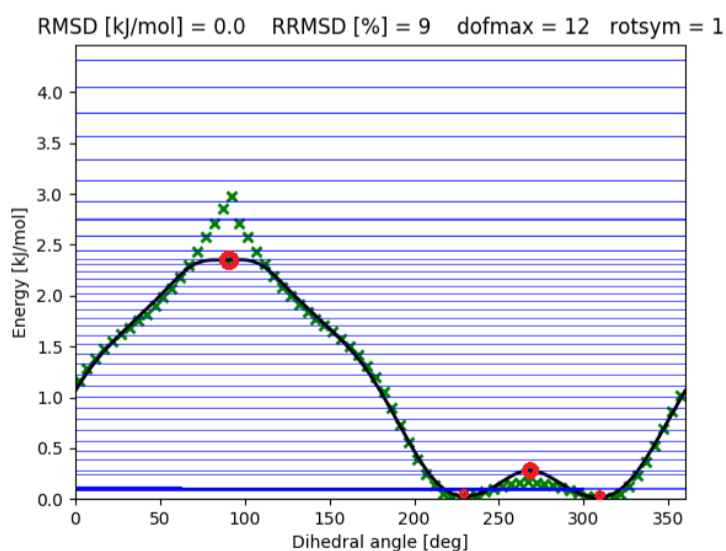

Figure S38: Methanol – furan  $\pi$  scan improved by the TAMkinTools functions from this study. The scan points are the same as in Fig. S31.

### PI bonded configuration

```
scanPIO = add_point(scanPI, -135.75453*np.pi/180.0, 0.00/2625.4995+ref_energy) # Min_mirror
scanPI1 = add_point(scanPIO, -48.17849*np.pi/180.0, 0.00/2625.4995+ref_energy) # Min
scanPI2 = add_point(scanPI1, 89.49808*np.pi/180.0, 2.35/2625.4995+ref_energy) # TShi
scanPI3 = add_point(scanPI2, -91.96651*np.pi/180.0, 0.28/2625.4995+ref_energy) # TSlo

myderivativevalues = [0.0 for i in range(4)]
myderivateposition = [-135.75453*np.pi/180.0,
                     -48.17849*np.pi/180.0,
```

```

89.49808*numpy.pi/180.0,
-91.96651*numpy.pi/180.0]

myderivativeweights = [0.1 for i in range(4)]
myderivative = [myderivativevalues,myderivateposition,myderivativeweights]

rotor = Opt_Rotor(scanPI3, PI, rotsym=1, cancel_freq='scan', weights=myweights,
                 derivatives = myderivative,
                 even=False, dofmax=14, num_levels=level_prec)

```

For this dimer, inclusion of optimized stationary points and their updated SPEs hardly changes the results, cf. Fig. S38. The added stationary points are given higher weight (100) while to the original points is given relatively lower weight (0.1) so that the minimization of curvature leads to a smooth behavior near the added high-level points.

### S4.3.2 Methanol – 2-methylfuran dimer

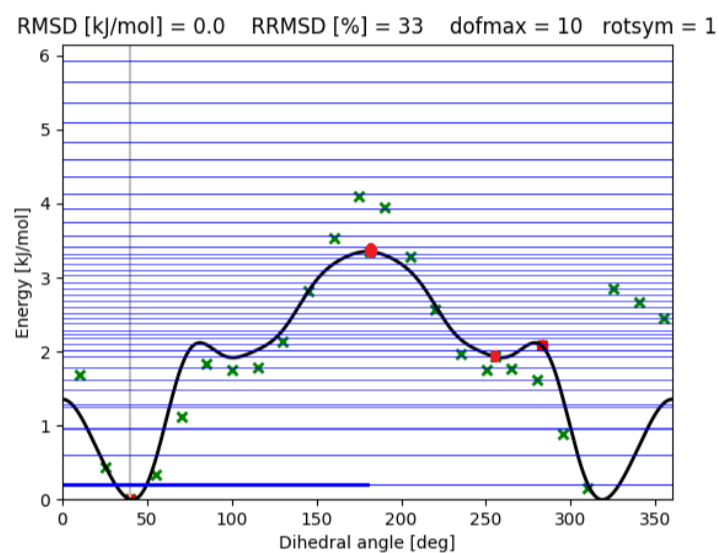

Figure S39: Methanol – 2-methylfuran OH scan improved by the TAMkinTools functions from this study. The scan points are the same as in Fig. S30 and the scan was performed along the C–O–O–C dihedral involving the furan oxygen and an adjacent carbon as well as the methanol oxygen and carbon.

#### OH bonded configuration

```

OHa = load_molecule_g03fchk("OHafreq.fchk", energy=-384.62550256)
OHb = load_molecule_g03fchk("OHbfreq.fchk", energy=-384.62623701)

scanOH = load_rotscan_g03log("scan_OHb_n_repl.log")

scanOH_ref = add_point(scanOH, 40.04135*numpy.pi/180.0, 0.00/2625.4995+ref_energy) #0t
scanOH_low = add_point(scanOH_ref, -77.19415*numpy.pi/180.0, 2.08/2625.4995+ref_energy) #TSlow
scan_OHhigh = add_point(scanOH_low, -178.4621*numpy.pi/180.0, 3.35/2625.4995+ref_energy) #TShigh
scan_OHconf2 = add_point(scan_OHhigh, -104.8774*numpy.pi/180.0, 1.93/2625.4995+ref_energy) #0p

myweights = [0.1 for i in range(25)]
myweights[4] = 0.0
myweights[5] = 0.0

myadded_points = [[ 40.04135*numpy.pi/180.0,
-77.19415*numpy.pi/180.0,
-178.4621*numpy.pi/180.0,
-104.8774*numpy.pi/180.0],
[0.00/2625.4995+ref_energy,
2.08/2625.4995+ref_energy,
3.35/2625.4995+ref_energy,
1.93/2625.4995+ref_energy]]

rotor = Opt_Rotor(scan_OHconf2, OHb, rotsym=1, cancel_freq='scan', even=True, weights = myweights,
                 derivatives = myderivatives, dofmax=14, num_levels=level_prec)

```

Introducing high-level CCSD(T) SPEs slightly raises the TS between the two minima, slightly increasing the curvature at the minima, cf. Fig. S39.

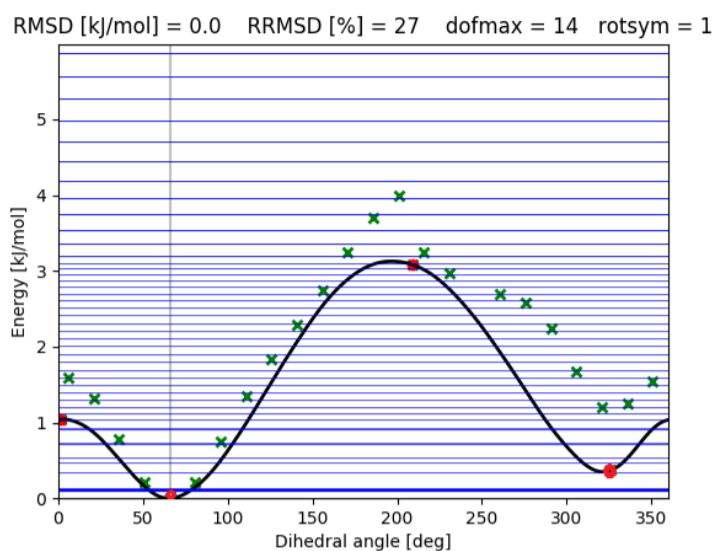

Figure S40: Methanol – 2-methylfuran  $\pi$  scan improved by the TAMkinTools functions from this study. The scan points are the same as in Fig. S31.

### PI bonded configuration

```
PIa      = load_molecule_g03fchk("PIafreq.fchk", energy=-384.62546887)
PIb      = load_molecule_g03fchk("PIbfreq.fchk", energy=-384.62532931)

scanPI    = load_rotscan_g03log("scan_PIa_p_repl.log")
angles, energies = scanPI.potential
scanPI_corrected = erase_point_scan(scanPI,12)

nma_angle = dihed_angle(nma_PIa.coordinates[scanPI_corrected.dihedral])[0]

ref_energy = potential_reference(scanPI, nma_angle)

scan_PIhigh = add_point(scanPI_corrected, -150.69257/180.0*numpy.pi, 3.08/2625.4995+ref_energy) #TShigh
scan_PIlow  = add_point(scan_PIhigh,      1.20334/180.0*numpy.pi, 1.04/2625.4995+ref_energy) #TSlow
scan_PI2    = add_point(scan_PIlow,      -33.81733/180.0*numpy.pi, 0.37/2625.4995+ref_energy) #TSlow
scan_PI3    = add_point(scan_PI2,        65.75423/180.0*numpy.pi, 0.00/2625.4995+ref_energy) #TSlow

rotor     = Opt_Rotor(scan_PI3, PIa, rotsym=1, cancel_freq='scan', weights = myweights, derivatives=myderivative,
                      even=False, dofmax=14, num_levels=level_prec)
```

The optimized fit with TamkinTools avoids the artificial minimum by minimizing curvature, cf. Fig. S40.

### S4.3.3 Methanol – 2,5-dimethylfuran dimer

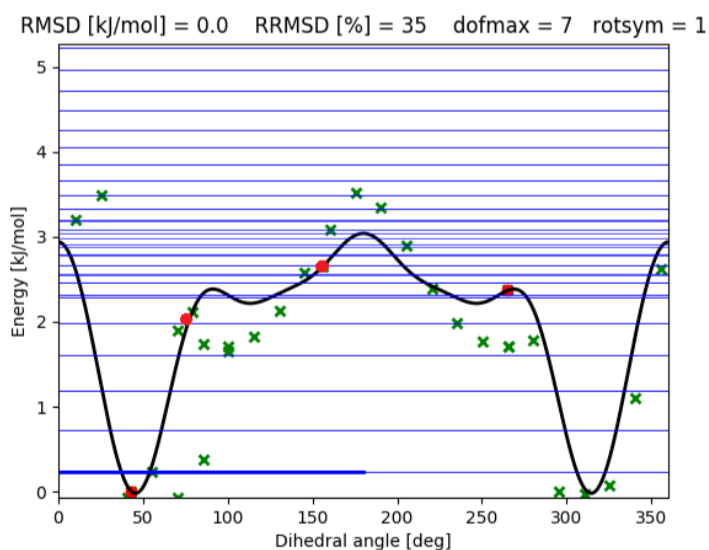

Figure S41: Methanol – 2,5-dimethylfuran OH scan improved by the TAMkinTools functions from this study. The scan points are the same as in Fig. S30 and the scan was performed along the C–O–O–C dihedral involving the furan oxygen and an adjacent carbon as well as the methanol oxygen and carbon.

### OH bonded configuration

```
level_prec = 200
T_plot     = 1
ExtRotSym  = 1

OHa      = load_molecule_g03fchk("OHa.fchk", energy=-423.89133413)
OHb      = load_molecule_g03fchk("OHb.fchk", energy=-423.89223624)

scanOHpp  = load_rotscan_g03log("OHa+_repl.log")
scanOHn   = load_rotscan_g03log("OHa-_repl.log")
combscan  = combine_Scan(scanOHn, scanOHpp)

scanmin0  = add_point(combscan, 43.16909*numpy.pi/180.0, 0.00/2625.4995+ref_energy) #0t
scanmin1  = add_point(scanmin0, -94.77078*numpy.pi/180.0, 2.37/2625.4995+ref_energy) #0p
scan_OHsmall = add_point(scanmin1, 79.10000*numpy.pi/180.0, 2.12/2625.4995+ref_energy) #TS
scan_OHfinal = add_point(scan_OHsmall, 156.00091*numpy.pi/180.0, 2.65/2625.4995+ref_energy) #TShigh
```



```
rotor = Opt_Rotor(scan_0Hfinal, 0Hb, rotsym=1, cancel_freq='scan',
                 even=True, weights = myweights, derivatives=myderivatives,
                 dofmax=14, num_levels=level_prec)
```

When corrected using TamkinTools, the PES matches the minima well, cf. Fig. S41. This also slightly increases the computed ZPE.

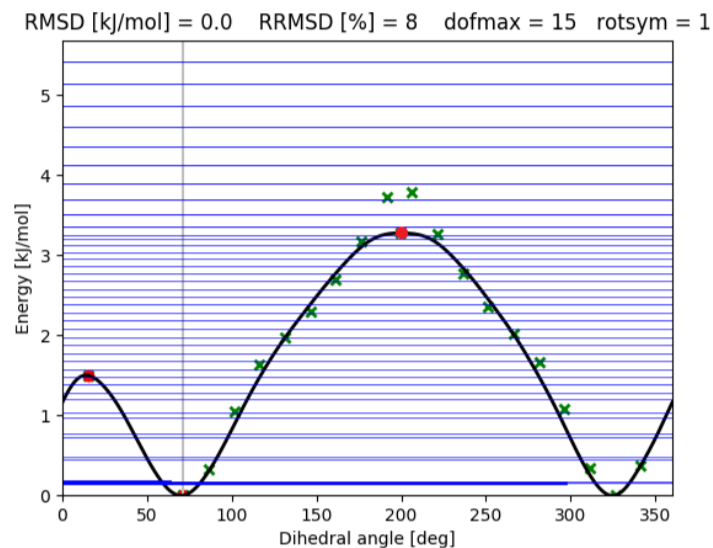

Figure S42: Methanol – 2,5-dimethylfuran  $\pi$  scan improved by the TAMkinTools functions from this study. The scan points are the same as in Fig. S31.

### PI bonded configuration

```
PI = load_molecule_g03fchk("PIfreq.fchk")

scanPI = load_rotscan_g03log("scan_PI_p_repl.log")

scan_PI0 = add_point(scanPI, 71.3838*numpy.pi/180.0, (1.66-1.66)/2625.4995+ref_energy) #TSlow
scan_PIlow = add_point(scan_PI0, 15.1597*numpy.pi/180.0, (3.16-1.66)/2625.4995+ref_energy) #TSlow
scan_PIhigh = add_point(scan_PIlow, -160.0900*numpy.pi/180.0, (4.94-1.66)/2625.4995+ref_energy) #TShigh

myweights = [0.1 for i in range(19)]

myweights[17] = 100 # also "stationary"

rotor = Opt_Rotor(scan_PIhigh, rotsym=1, cancel_freq='scan', weights = myweights,
                 derivatives = myderivatives,
                 even=False, dofmax=14, num_levels=level_prec)
```

Optimized fits with TamkinTools that include DLPNO-CCSD(T) SPEs slightly lower the high-energy TS and enlarge the low-energy TS, cf. Fig S42; apart from that, the picture is unchanged.

## S4.4 Zero-Point Energies

Vibrational ZPEs result already from rigid rotor harmonic oscillator (RRHO) treatments. In order to include the proper one-dimensional hindered rotor (1DHR) ZPE within the 'cancel\_freq' treatment, a harmonic oscillator (HO) is fitted to the curvature and the total partition function is divided by this, that is the total ZPE is reduced by the ZPE of that HO. The partition function file will just print this ZPE. All in all, the total contribution of 1DHR treatment is the ZPE of the hindered rotor (HR) which is the corresponding energy level, minus the ZPE of the fitted HO.

For higher-energy conformations, TAMkin would still pertain to the lowest-energy minimum by producing negative energy levels. Instead, we take the first eigenvalue where the corresponding wave function shows a population peak in the well of the respective conformation as ZPE. For local minima, the energy of the eigenvalue is taken relative to the potential energy of the respective local minimum so that addition of the total ZPE to the respective potential energy yields the energy at 0 K

Table S30: ZPEs for all dimers in this study in kJ/mol; differences are given always with respect to the top Ot conformation. The first data column comprises pure unscaled RRHO ZPE corrections. The third represents the original TAMkin procedure involving the direct fit. The fifth comprises results from the optimized PES fitting procedure using TAMkinTools (this study). The PES for the HR treatment are based on CC aug-cc-pv(t,q)z extrapolation except for the values in parentheses that are based on aug-cc-pv5z energies.

| Structure    | RRHO   | $\Delta_{Ot}$ | direct fit | $\Delta_{Ot}$ | opt. fit        | $\Delta_{Ot}$ |
|--------------|--------|---------------|------------|---------------|-----------------|---------------|
| Me-Fu Ot     | 322.77 | 0             | 322.71     | 0             | 322.95 (322.73) | 0 (0)         |
| Me-Fu Op     | 322.51 | -0.26         | 322.61     | -0.10         | 322.75 (322.48) | -0.20 (-0.25) |
| Me-Fu PI     | 321.94 | -0.83         | 321.92     | -0.78         | 321.92 (321.92) | -1.03 (-0.81) |
| Me-2mFu Ot   | 396.25 | 0             | 396.46     | 0             | 396.25          | 0             |
| Me-2mFu Op   | 395.88 | -0.37         | 395.91     | -0.55         | 395.83          | -0.41         |
| Me-2mFu PIa  | 395.22 | -1.03         | 395.22     | -1.24         | 395.22          | -1.03         |
| Me-2mFu PIb  | 395.15 | -1.10         | 395.17     | -1.29         | 395.15          | -1.09         |
| Me-25dmFu Ot | 469.12 | 0             | 469.06     | 0             | 469.16          | 0             |
| Me-25dmFu Op | 468.82 | -0.31         | 468.67     | -0.39         | 468.72          | -0.44         |
| Me-25dmFu PI | 468.37 | -0.75         | 468.31     | -0.35         | 468.36          | -0.33         |

## S5 Selected probability density functions

All probability density functions plotted here contain some shift to make them better distinguishable from the axis.

### S5.1 Original Goebench submission profiles

#### S5.1.1 Methanol – furan, OH-bonded

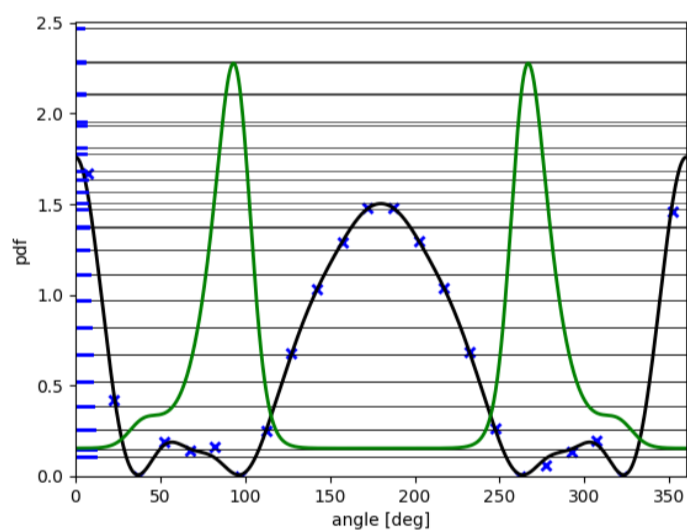

Figure S43: Probability density function for energy level 0.

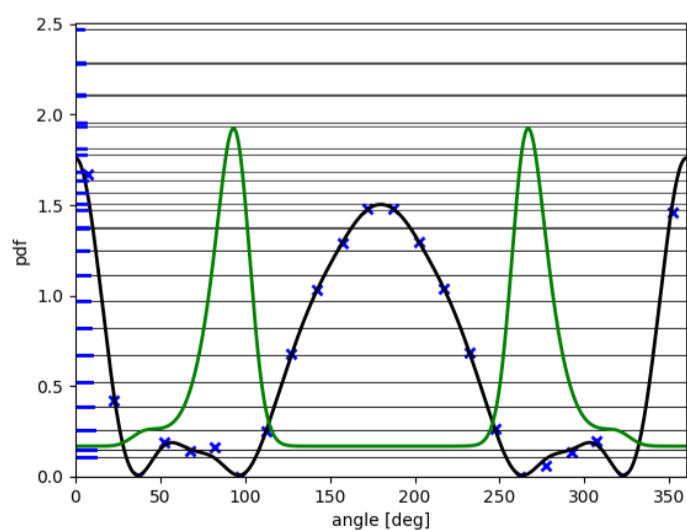

Figure S44: Probability density function for energy level 1.

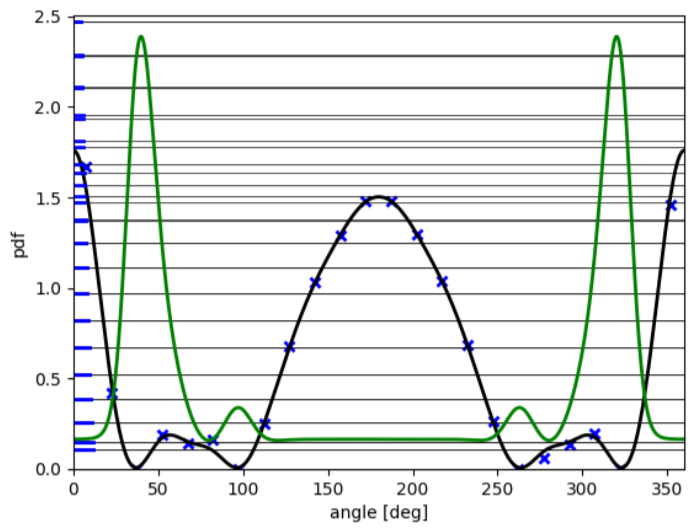

Figure S45: Probability density function for energy level 2.

### S5.1.2 Methanol – 2-methylfuran

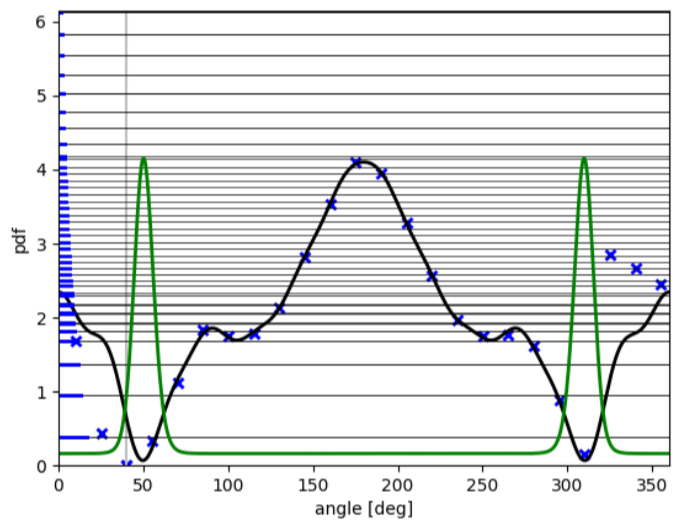

Figure S46: Probability density function for energy level 0.

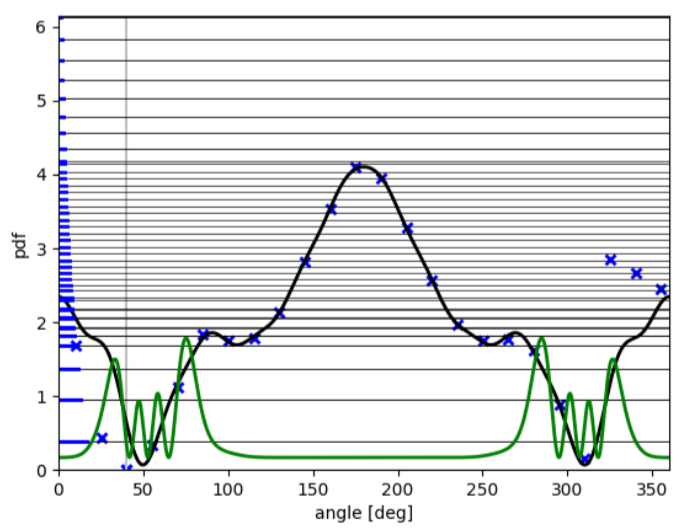

Figure S47: Probability density function for energy level 7.

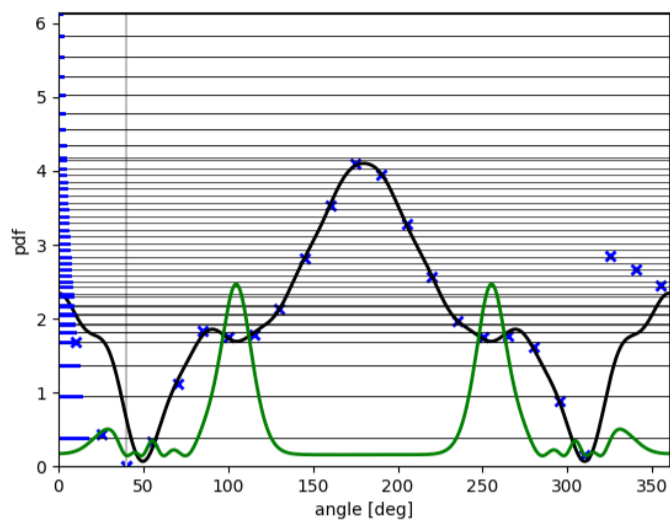

Figure S48: Probability density function for energy level 8.

**OH-bonded conformation**

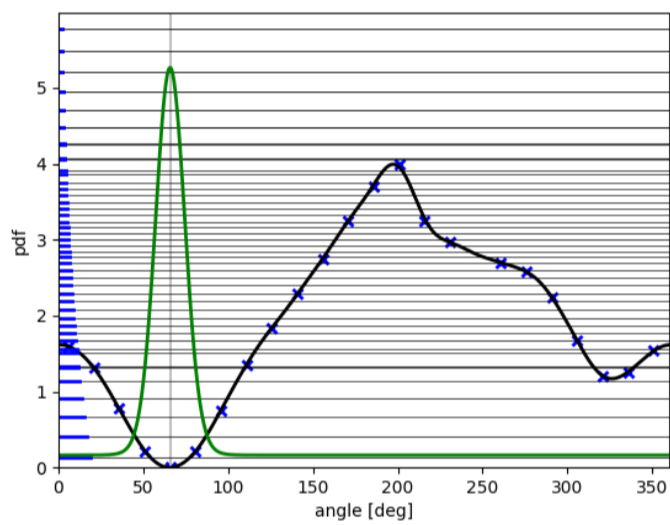

Figure S49: Probability density function for energy level 0.

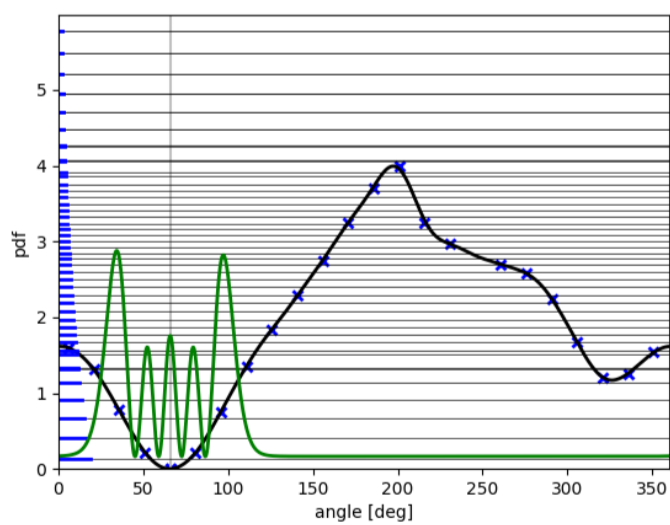

Figure S50: Probability density function for energy level 4.

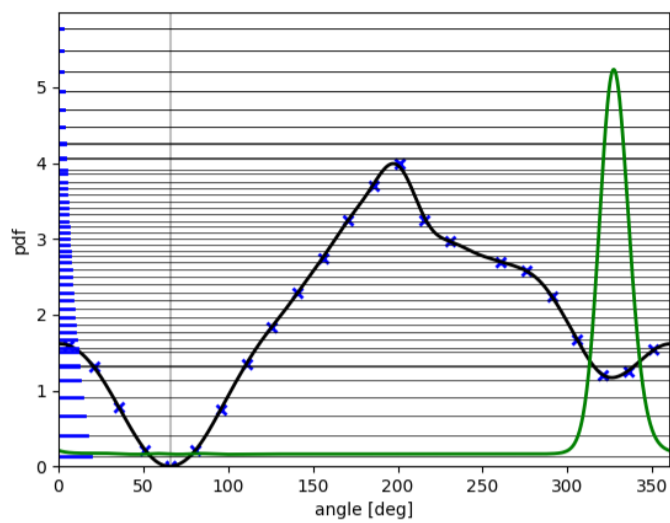

Figure S51: Probability density function for energy level 5.

PI-bonded conformation

S5.1.3 Methanol – 2,5-dimethylfuran, OH-bonded

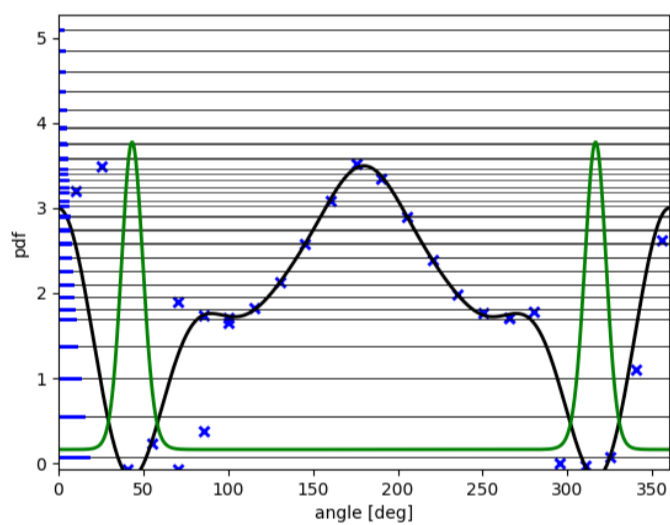

Figure S52: Probability density function for energy level 0.

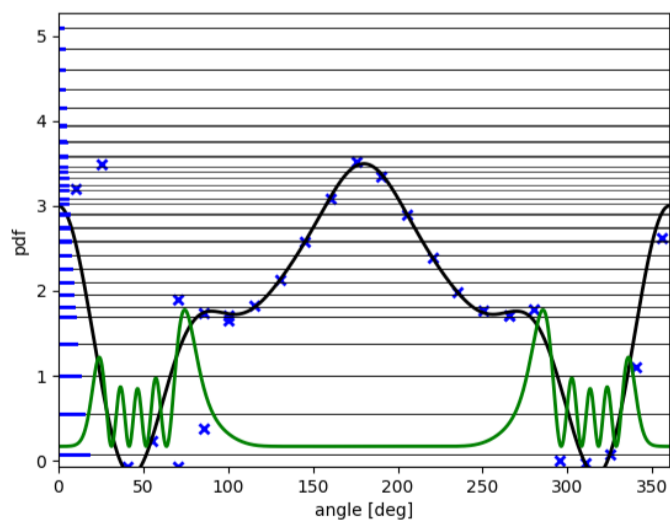

Figure S53: Probability density function for energy level 9.

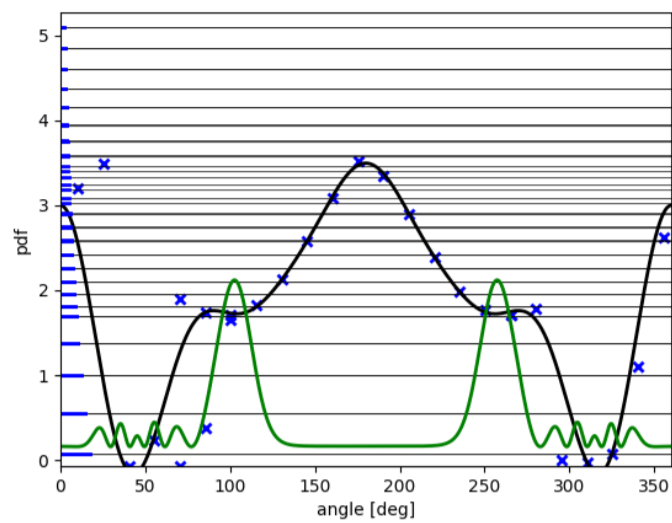

Figure S54: Probability density function for energy level 10.

## S5.2 Improved profiles using TAMkinTools

### S5.2.1 Methanol – furan, OH-bonded, aug-cc-pv5z

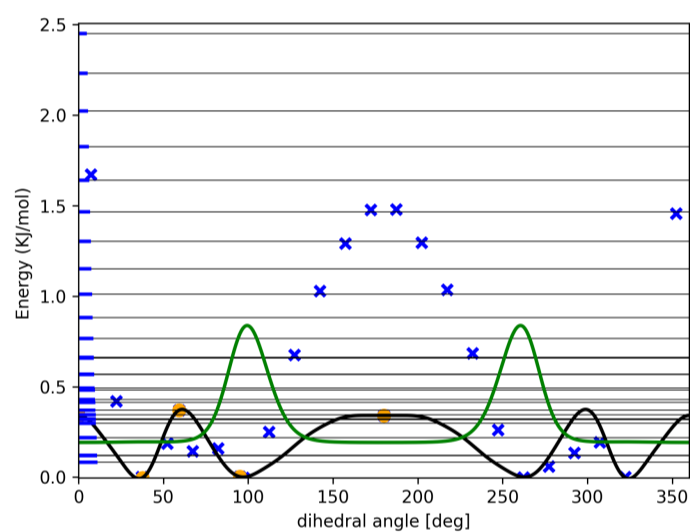

Figure S55: Probability density function for energy level 0.

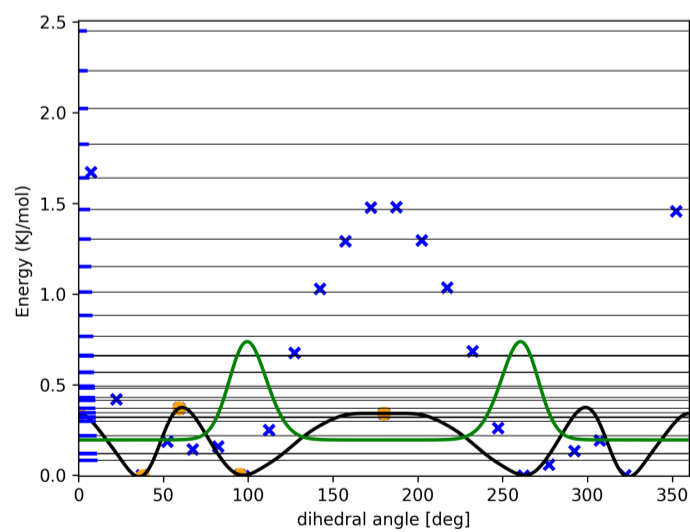

Figure S56: Probability density function for energy level 1.

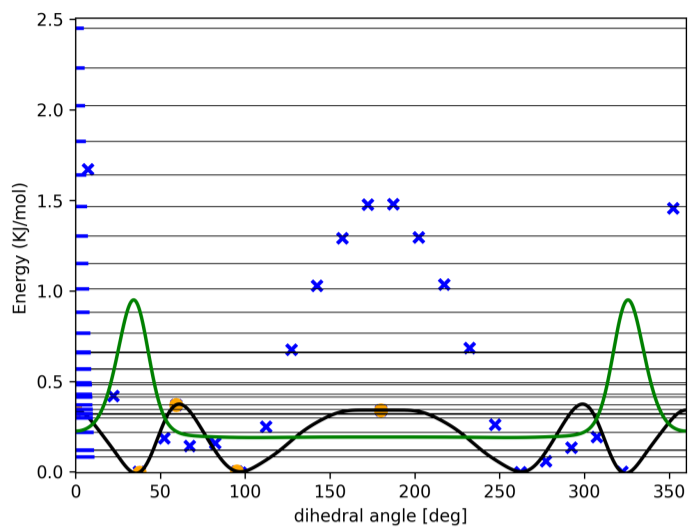

Figure S57: Probability density function for energy level 2.

### S5.2.2 Methanol – furan, OH-bonded, aug-cc-pv(t,q)z

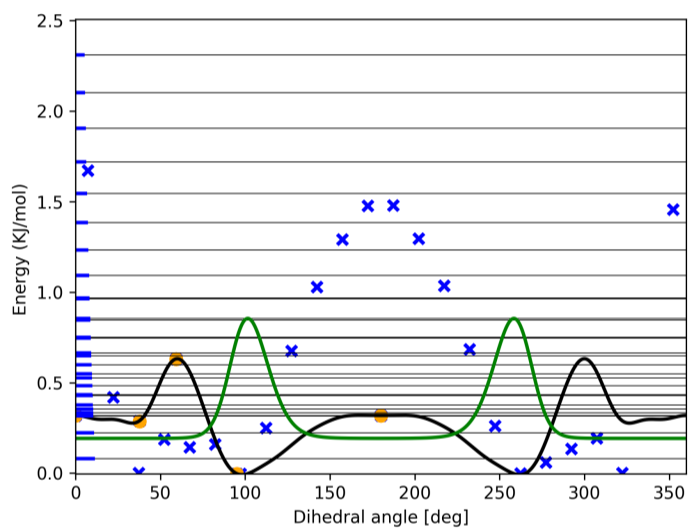

Figure S58: Probability density function for energy level 0.

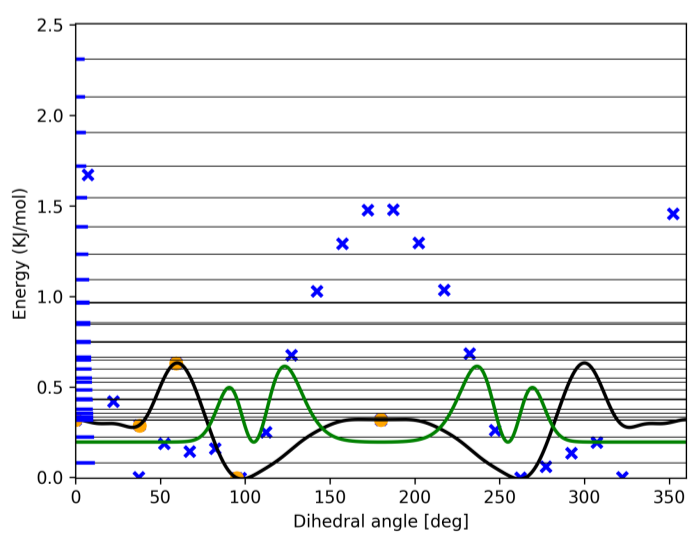

Figure S59: Probability density function for energy level 3.

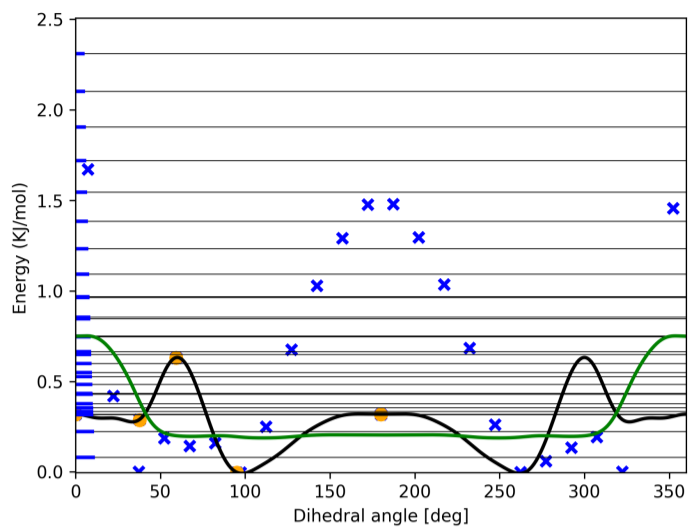

Figure S60: Probability density function for energy level 4.

### S5.2.3 Methanol – 2-methylfuran

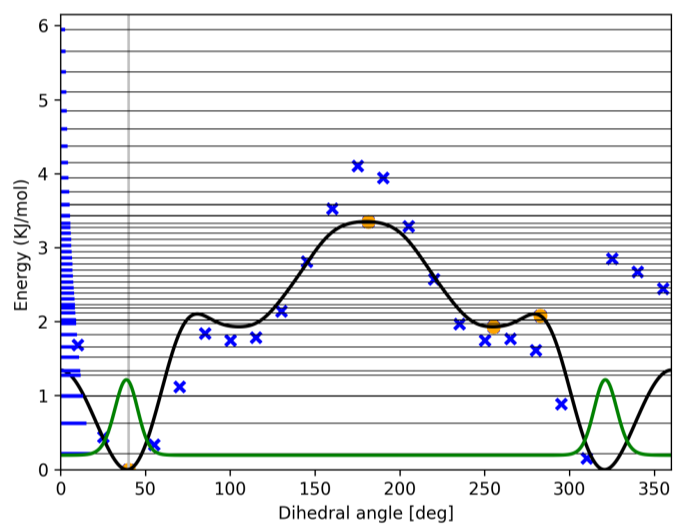

Figure S61: Probability density function for energy level 0.

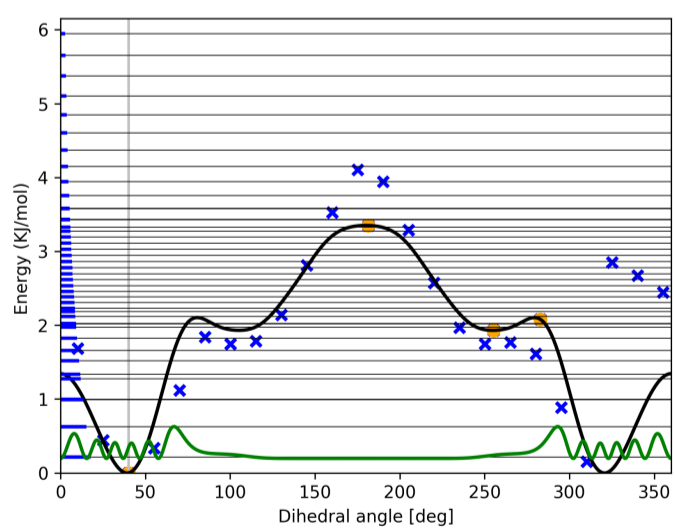

Figure S62: Probability density function for energy level 11.



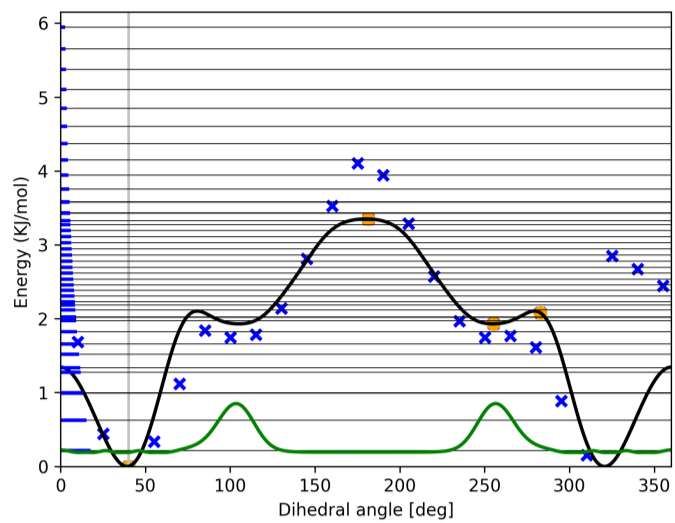

Figure S63: Probability density function for energy level 12.

### OH-bonded conformation

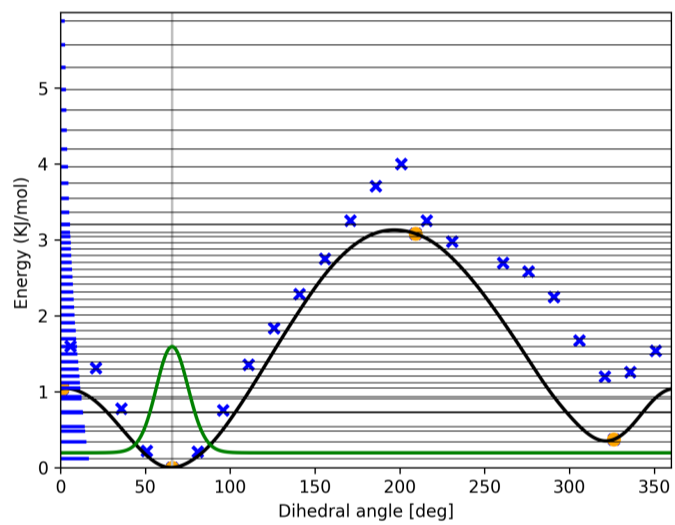

Figure S64: Probability density function for energy level 0.

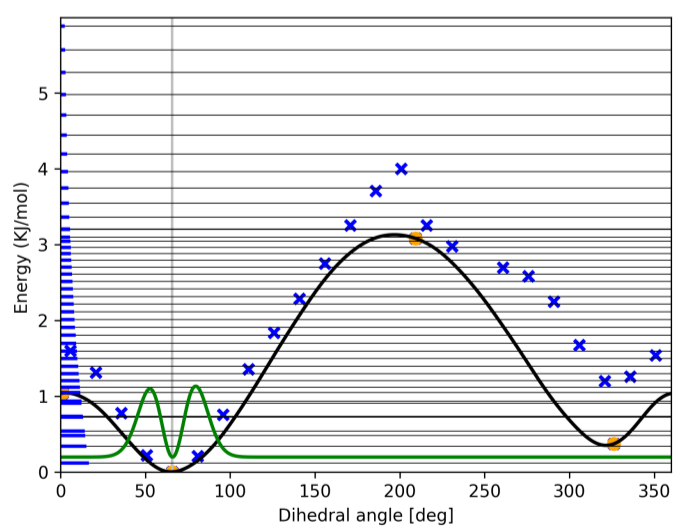

Figure S65: Probability density function for energy level 1.

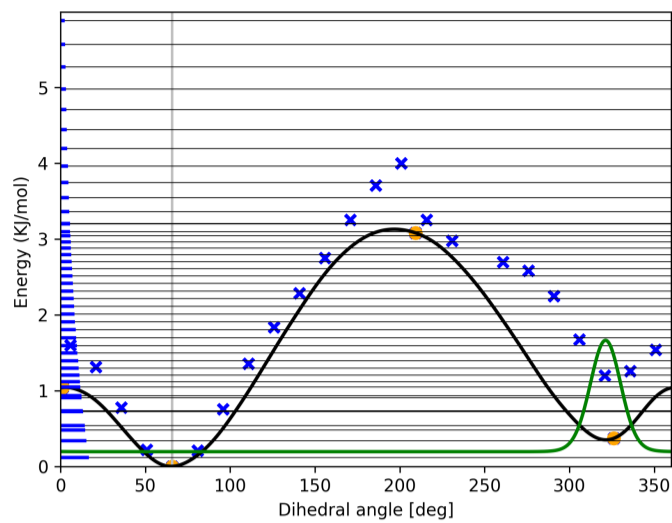

Figure S66: Probability density function for energy level 2.

### PI-bonded conformation

#### S5.2.4 Methanol – 2,5-dimethylfuran, OH-bonded

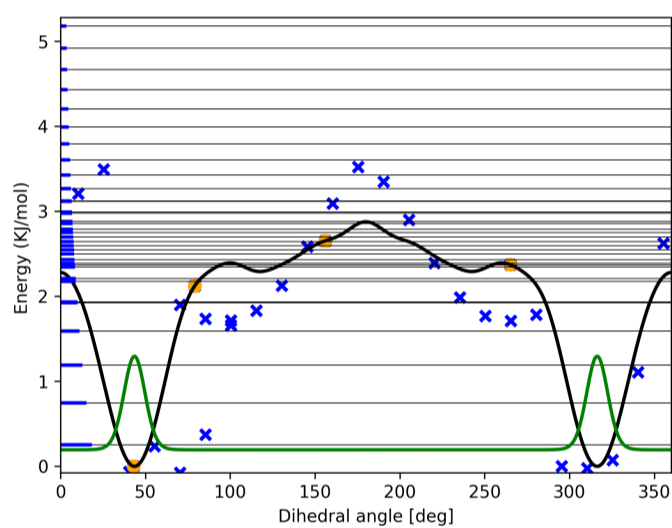

Figure S67: Probability density function for energy level 0.

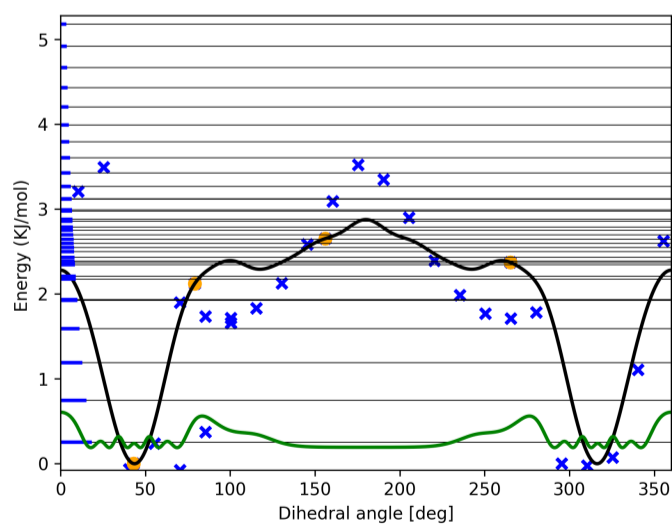

Figure S68: Probability density function for energy level 12.

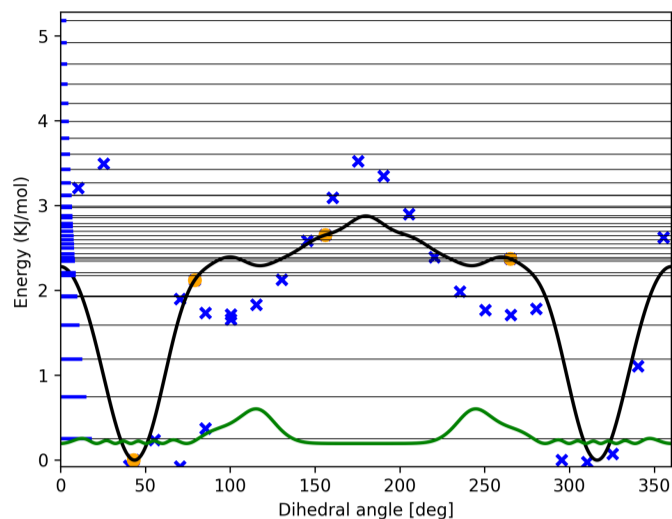

Figure S69: Probability density function for energy level 13.

## References

- [1] M. J. Frisch, G. W. Trucks, H. B. Schlegel, G. E. Scuseria, M. A. Robb, J. R. Cheeseman, G. Scalmani, V. Barone, B. Mennucci, G. A. Petersson, H. Nakatsuji, M. Caricato, X. Li, H. P. Hratchian, A. F. Izmaylov, J. Bloino, G. Zheng, J. L. Sonnenberg, M. Hada, M. Ehara, K. Toyota, R. Fukuda, J. Hasegawa, M. Ishida, T. Nakajima, Y. Honda, O. Kitao, H. Nakai, T. Vreven, J. A. Montgomery, Jr., J. E. Peralta, F. Ogliaro, M. Bearpark, J. J. Heyd, E. Brothers, K. N. Kudin, V. N. Staroverov, R. Kobayashi, J. Normand, K. Raghavachari, A. Rendell, J. C. Burant, S. S. Iyengar, J. Tomasi, M. Cossi, N. Rega, J. M. Millam, M. Klene, J. E. Knox, J. B. Cross, V. Bakken, C. Adamo, J. Jaramillo, R. Gomperts, R. E. Stratmann, O. Yazyev, A. J. Austin, R. Cammi, C. Pomelli, J. W. Ochterski, R. L. Martin, K. Morokuma, V. G. Zakrzewski, G. A. Voth, P. Salvador, J. J. Dannenberg, S. Dapprich, A. D. Daniels, O. Farkas, J. B. Foresman, J. V. Ortiz, J. Cioslowski, and D. J. Fox. Gaussian 09 Revision D.01, 2009. Gaussian Inc. Wallingford CT 2009.
- [2] Frank Neese. The orca program system. *Wiley Interdisciplinary Reviews: Computational Molecular Science*, 2(1):73–78, 2012.
- [3] Frank Neese and Edward F. Valeev. Revisiting the atomic natural orbital approach for basis sets: Robust systematic basis sets for explicitly correlated and conventional correlated ab initio methods? *J. Chem. Theory Comput.*, 7(1):33–43, 2011. PMID: 26606216.
- [4] Dimitrios G. Liakos, Manuel Sparta, Manoj K. Kesharwani, Jan M. L. Martin, and Frank Neese. Exploring the accuracy limits of local pair natural orbital coupled-cluster theory. *J. Chem. Theory Comput.*, 11(4):1525–1539, 2015.
- [5] An Ghysels, Toon Verstraelen, Karen Hemelsoet, Michel Waroquier, and Veronique van Speybroeck. Tamkin: A versatile package for vibrational analysis and chemical kinetics. *Journal of Chemical Information and Modeling*, 50(9):1736–1750, 2010.
- [6] Hannes C. Gottschalk, Anja Poblitzki, Martin A. Suhm, Muneerah M. Al-Mogren, Jens Antony, Alexander A. Auer, Leonardo Baptista, David M. Benoit, Giovanni Bistoni, Fabian Bohle, Rahma Dahmani, Dzmitry Firaha, Stefan Grimme, Andreas Hansen, Michael E. Harding, Majdi Hochlaf, Christof Holzer, Georg Jansen, Wim Klopper, Wassja A. Kopp, Leif C. Kröger, Kai Leonhard, Halima Mouhib, Frank Neese, Max N. Pereira, Inga S. Ulusoy, Axel Wuttke, and Ricardo A. Mata. The furan microsolvation blind challenge for quantum chemical methods: First steps. *J. Chem. Phys.*, 148(1):014301, 2018.
- [7] Hannes C. Gottschalk, Anja Poblitzki, Mariyam Fatima, Daniel A. Obenchain, Cristóbal Pérez, Jens Antony, Alexander A. Auer, Leonardo Baptista, David M. Benoit, Giovanni Bistoni, Fabian Bohle, Rahma Dahmani, Dzmitry Firaha, Stefan Grimme, Andreas Hansen, Michael E. Harding, Majdi Hochlaf, Christof Holzer, Georg Jansen, Wim Klopper, Wassja A. Kopp, Małgorzata Krasowska, Leif C. Kröger, Kai Leonhard, Muneerah Mogren Al-Mogren, Halima Mouhib, Frank Neese, Max N. Pereira, Muthuramalingam Prakash, Inga S. Ulusoy, Ricardo A. Mata, Martin A. Suhm, and Melanie Schnell. The first microsolvation step for furans: New experiments and benchmarking strategies. *J. Chem. Phys.*, 152(16):164303, 2020.
